# Supplementary material for: Mapping the human genetic architecture of COVID-19
Source: Springer Nature journal article supplement (doi:10.1038/s41586-021-03767-x), 2021-07-08

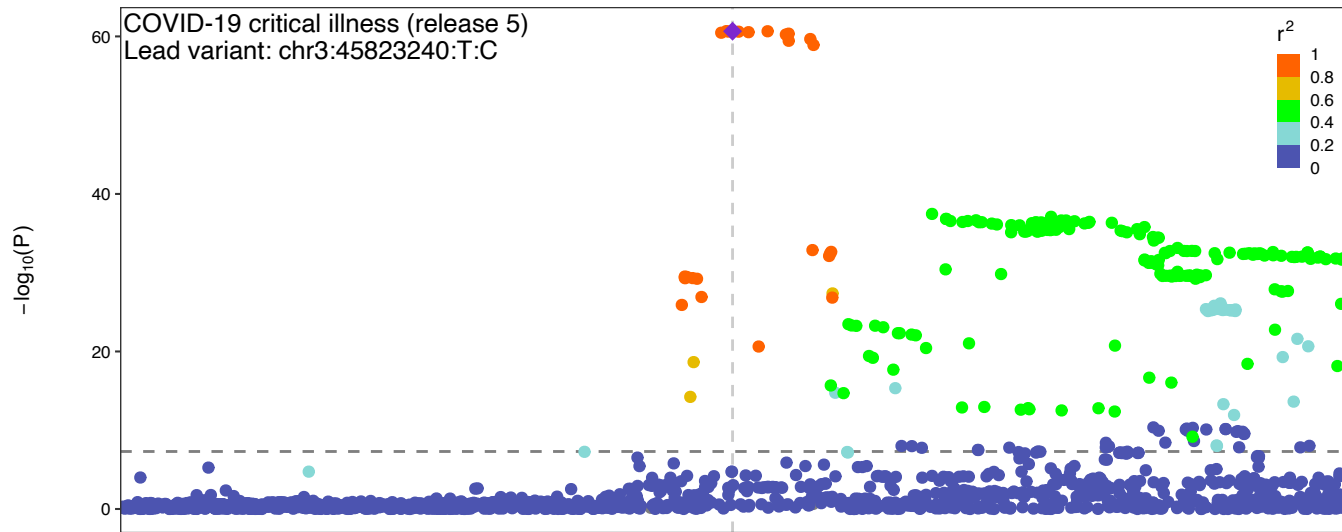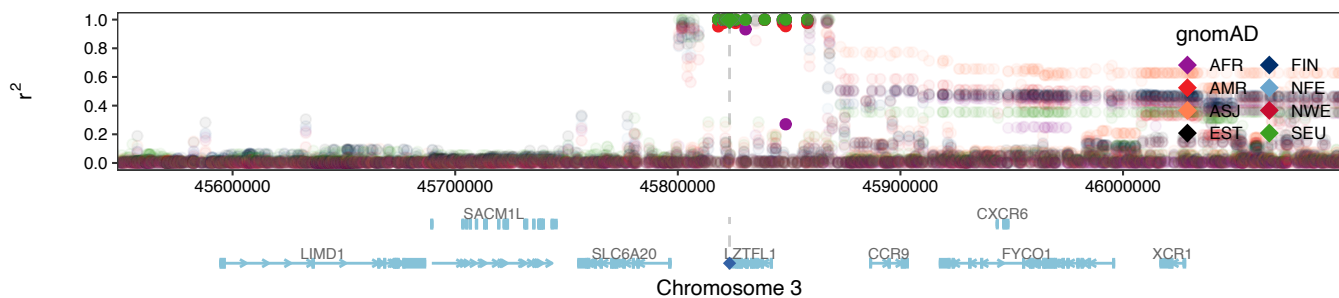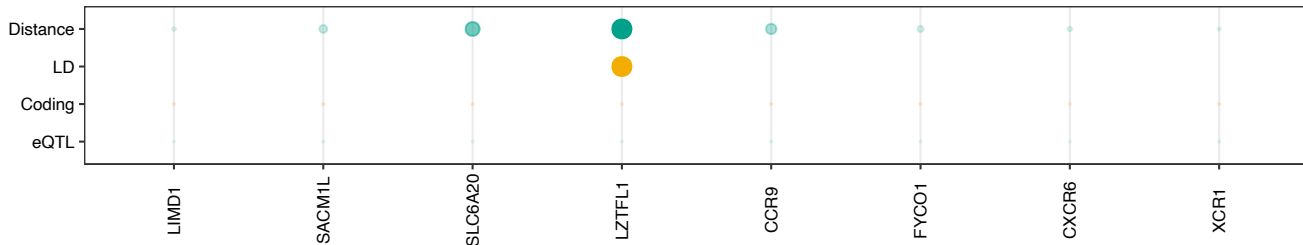

COVID-19 critical illness (release 5)  
Lead variant: chr12:112919388:G:A

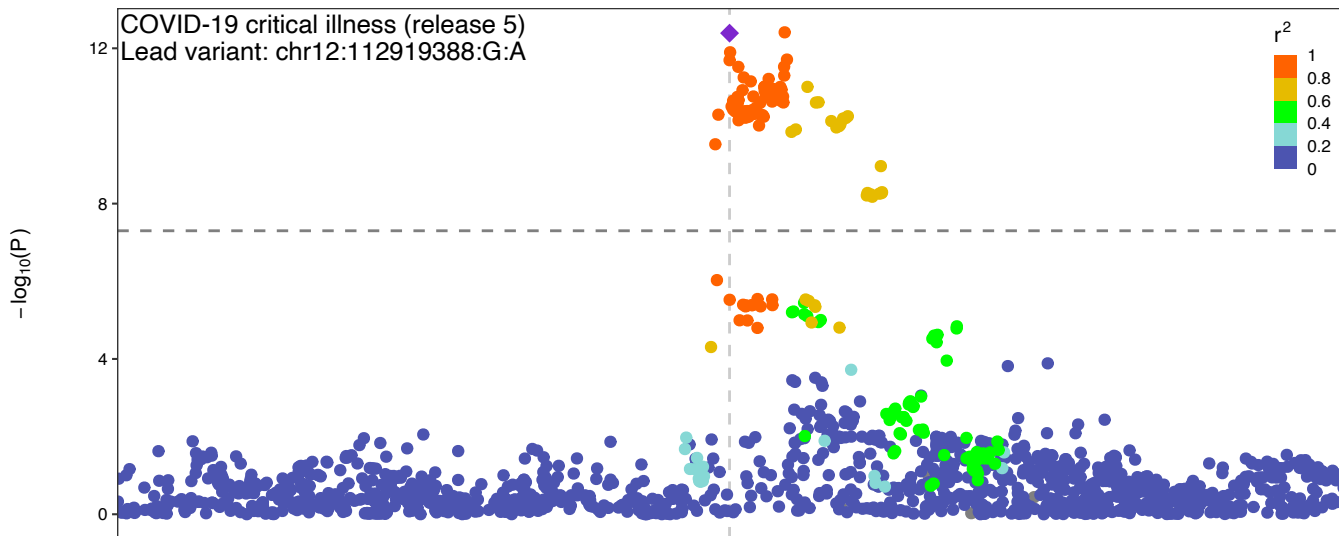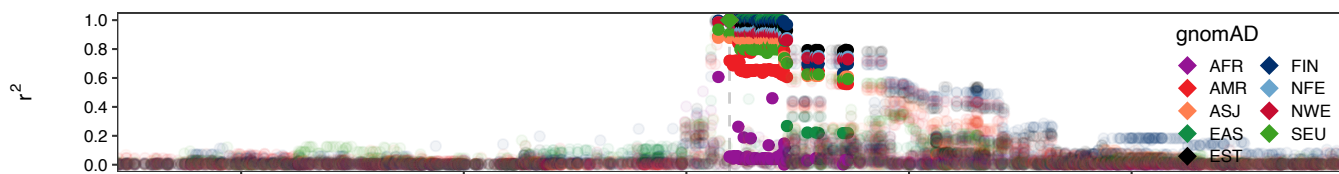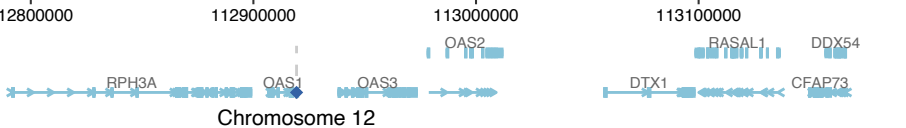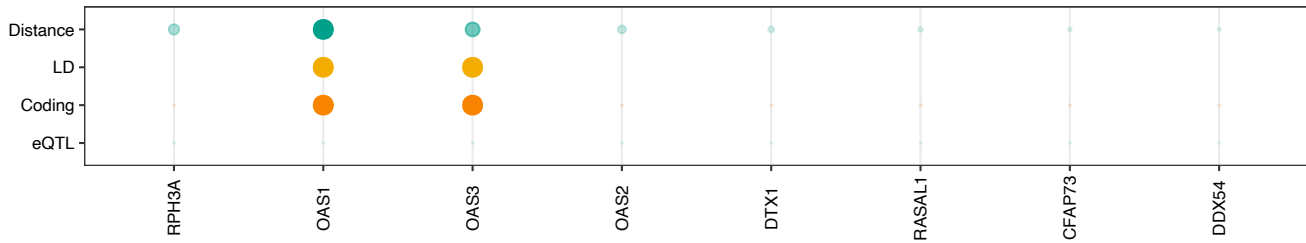

COVID-19 critical illness (release 5)

Lead variant: chr17:49863303:C:T

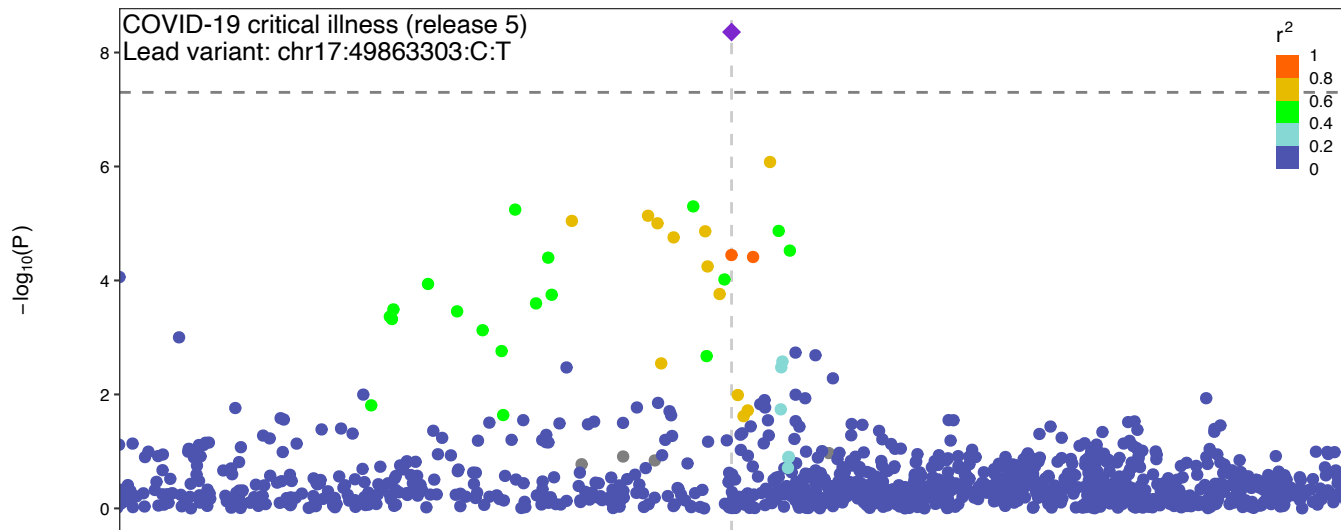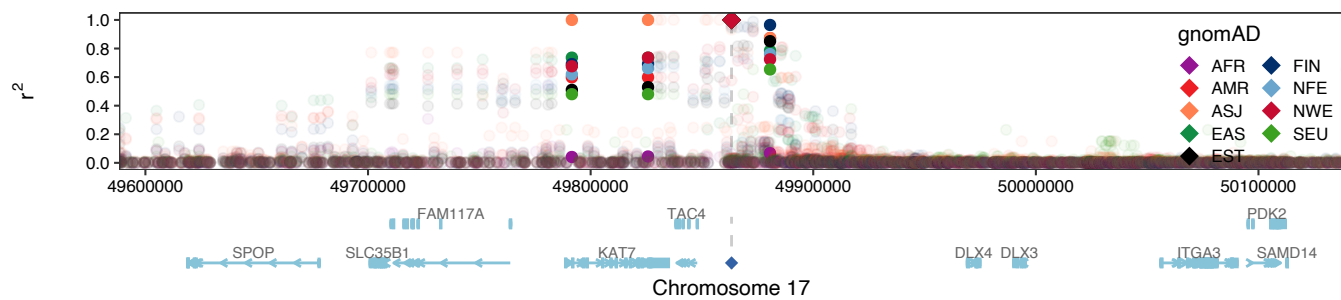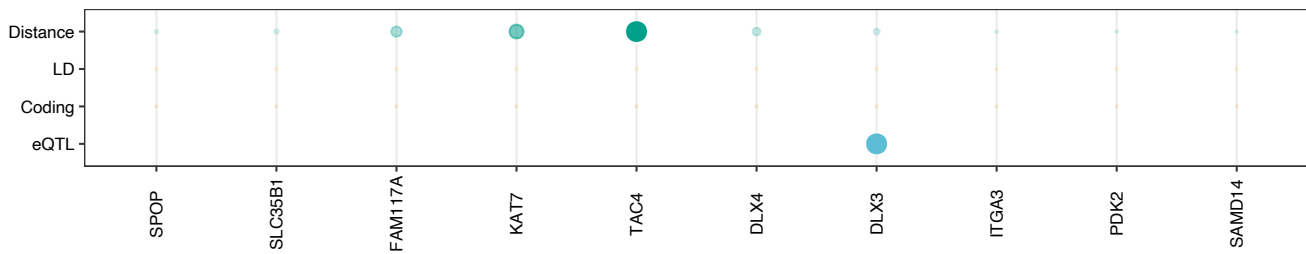

COVID-19 critical illness (release 5)

Lead variant: chr19:4719431:G:A

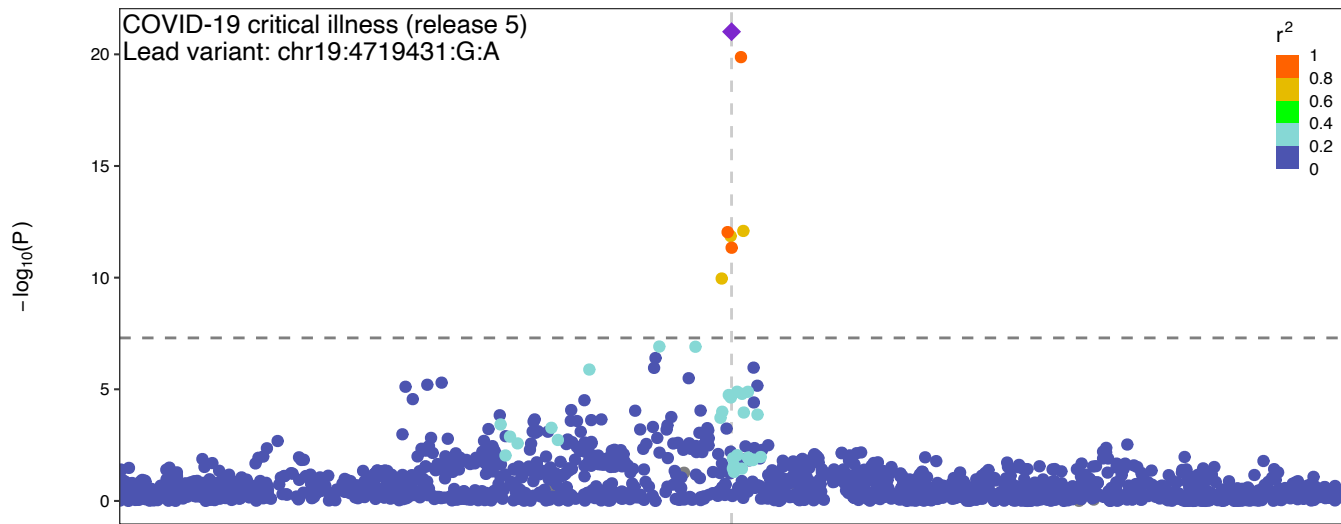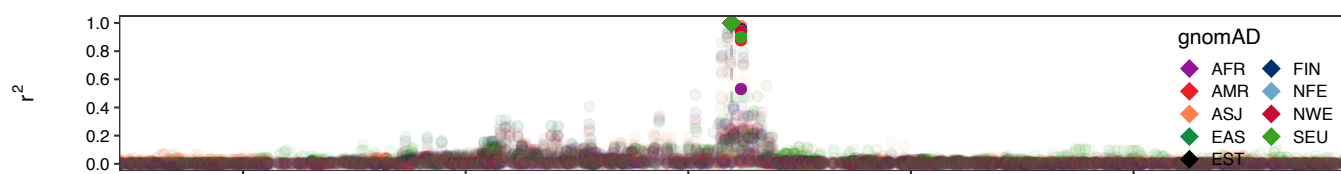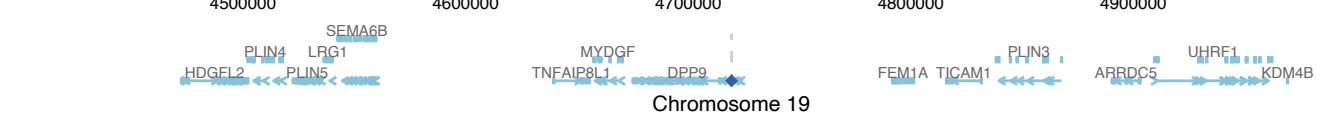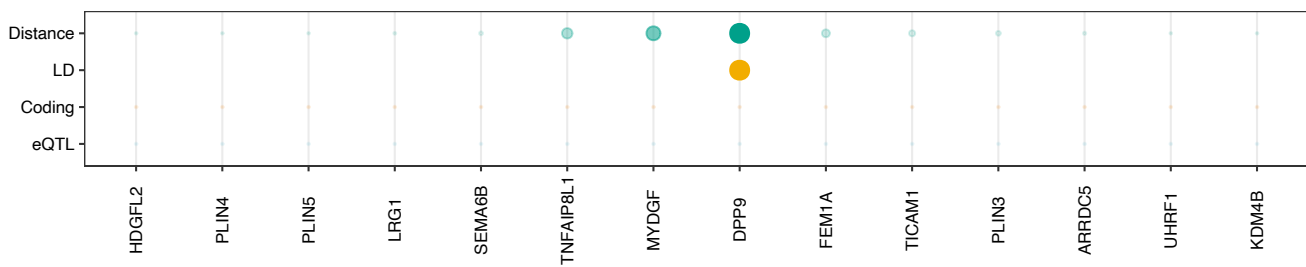

# COVID-19 critical illness (release 5)

Lead variant: chr19:10317045:T:A

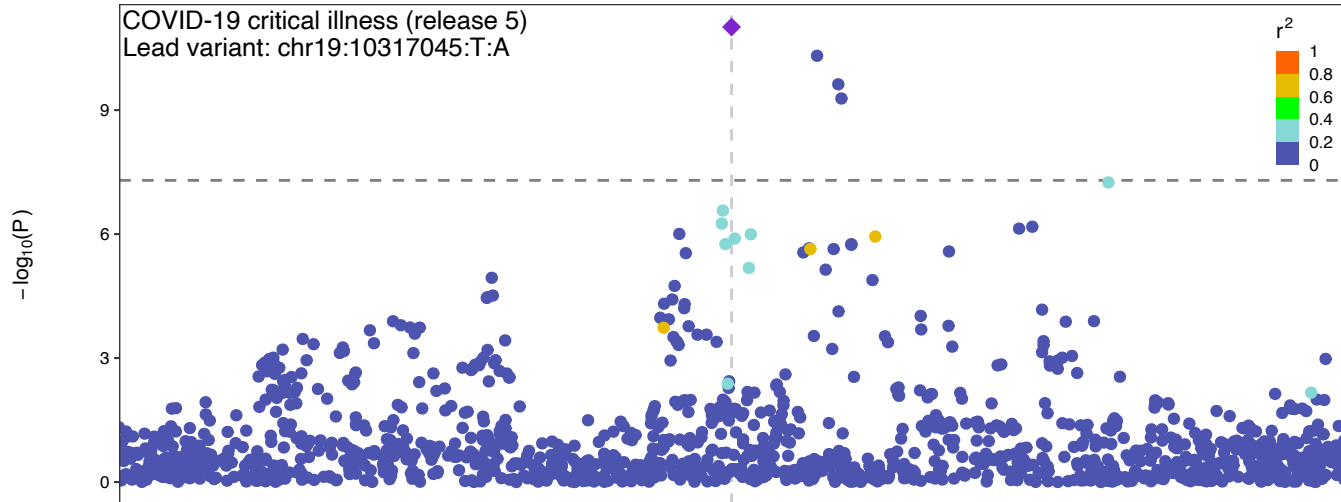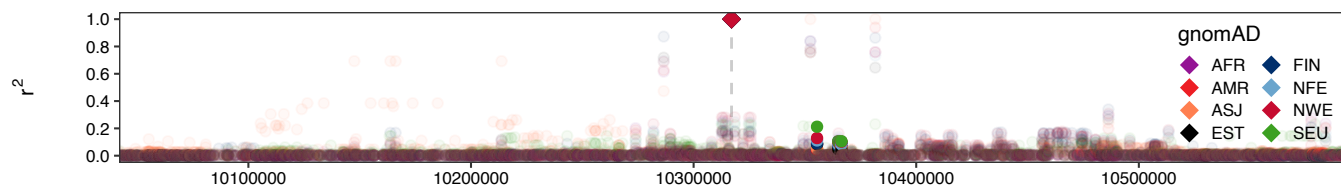

10100000 10200000 10300000 10400000 10500000

P2RY11 P2RY11 P2RY11  
 ANGPTL6 EIF3G SHFL PPAN  
 DNMT1  
 S1PR2 MRPL4 ICAM1 ICAM4 ICAM5 ZGLP1 RAVR1 RAVR1  
 ICAM3 TYK2 CDC37 PDE4A  
 KEAP1 S1PR5 ATG4D KRI1 CDKN2D

Chromosome 19

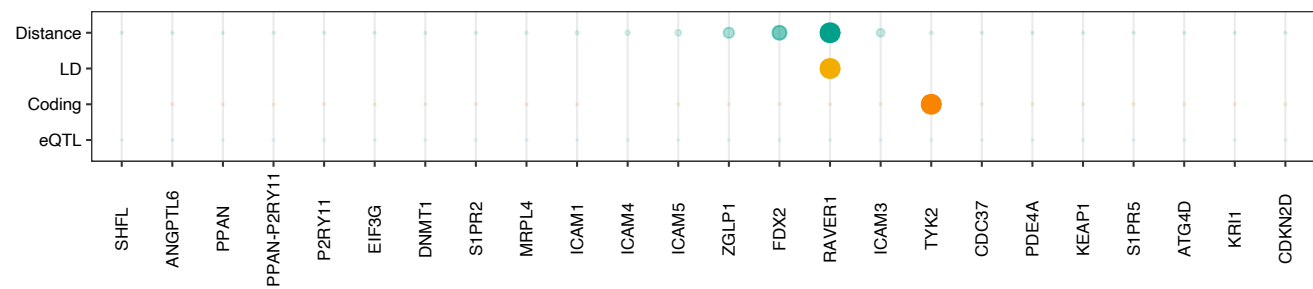

COVID-19 critical illness (release 5)

Lead variant: chr21:33242905:T:C

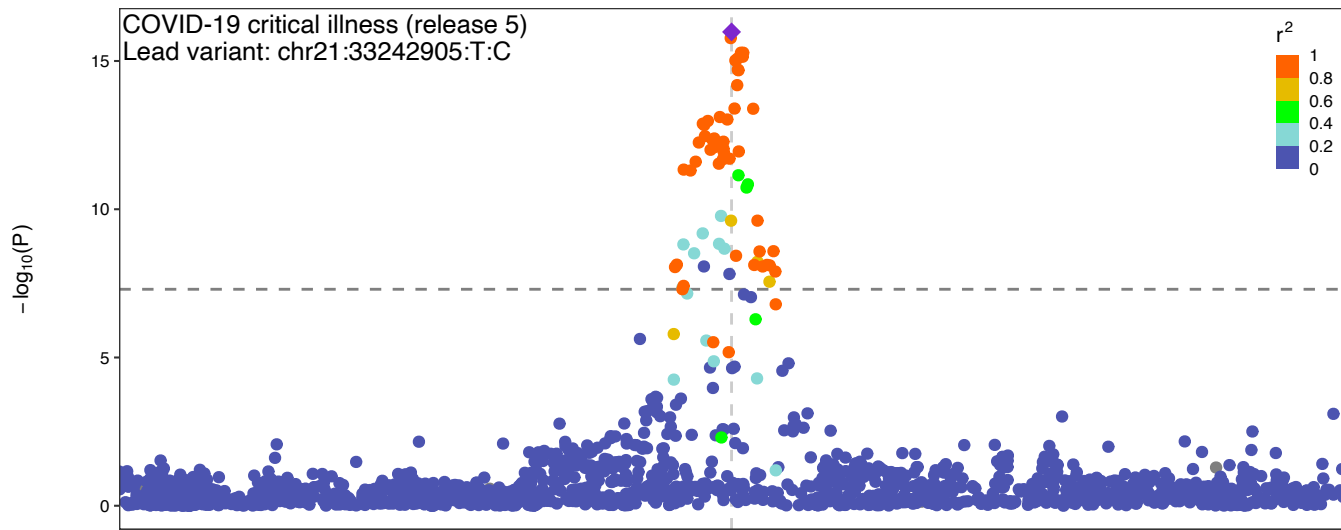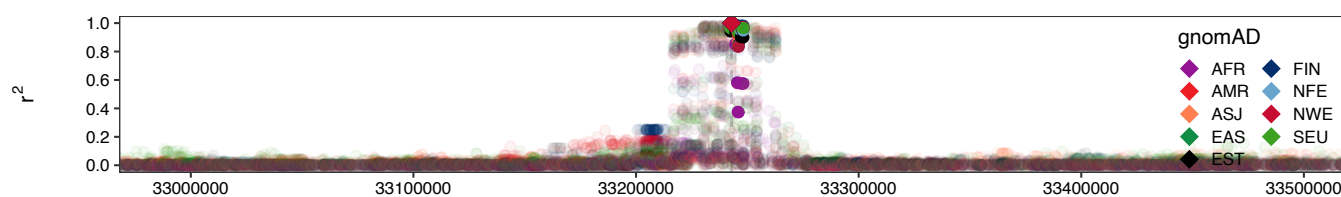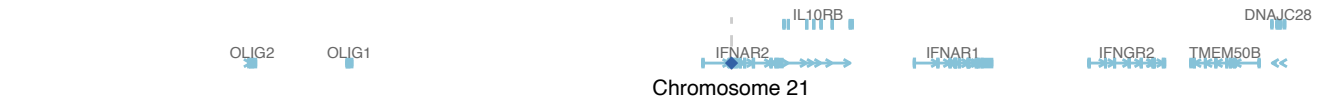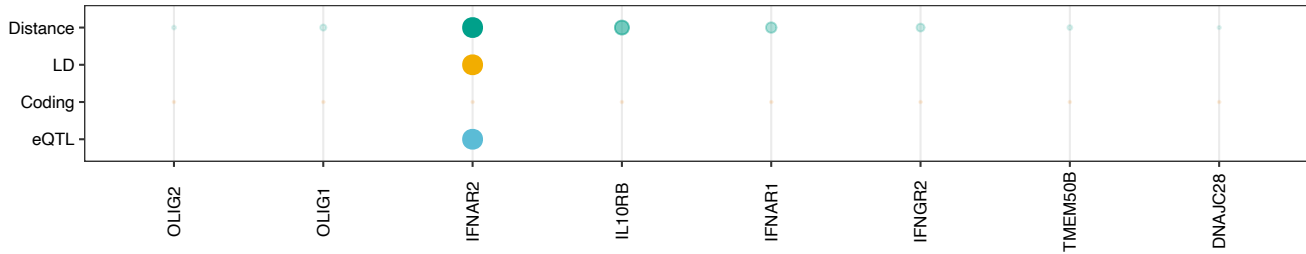

COVID-19 hospitalization (release 5)  
Lead variant: chr3:45823240:T:C

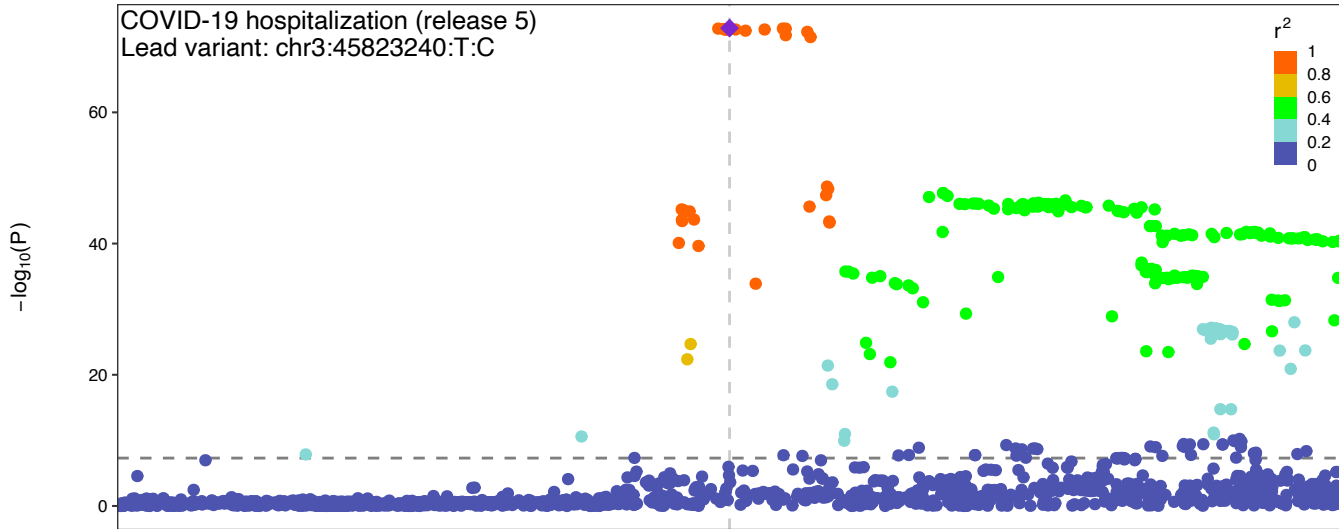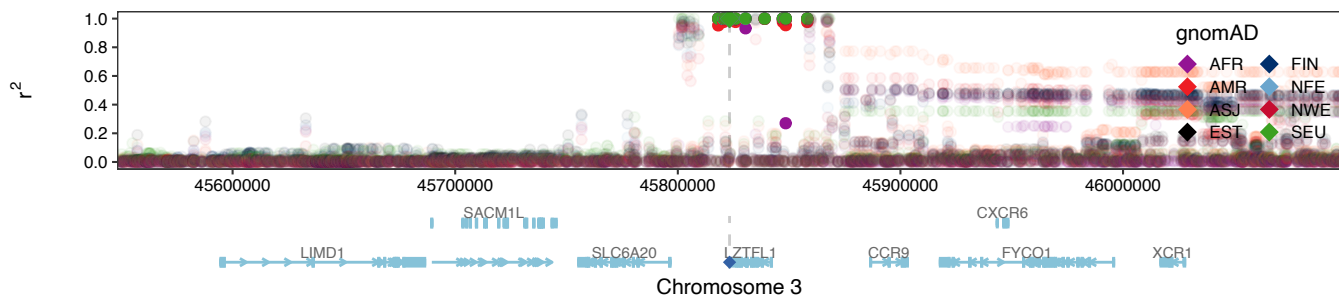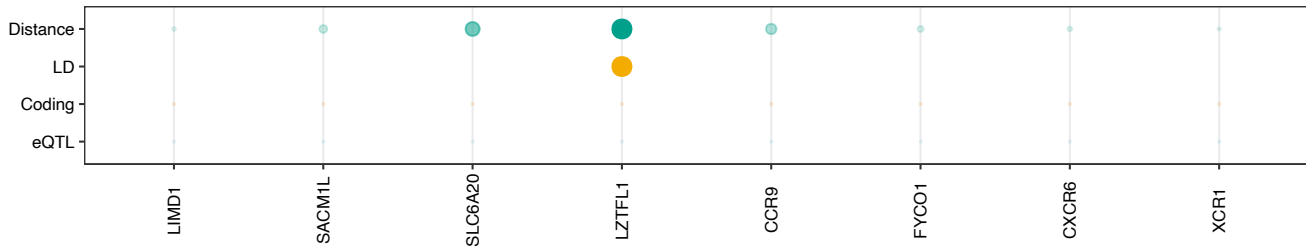

# COVID-19 hospitalization (release 5)

Lead variant: chr6:41534945:A:C

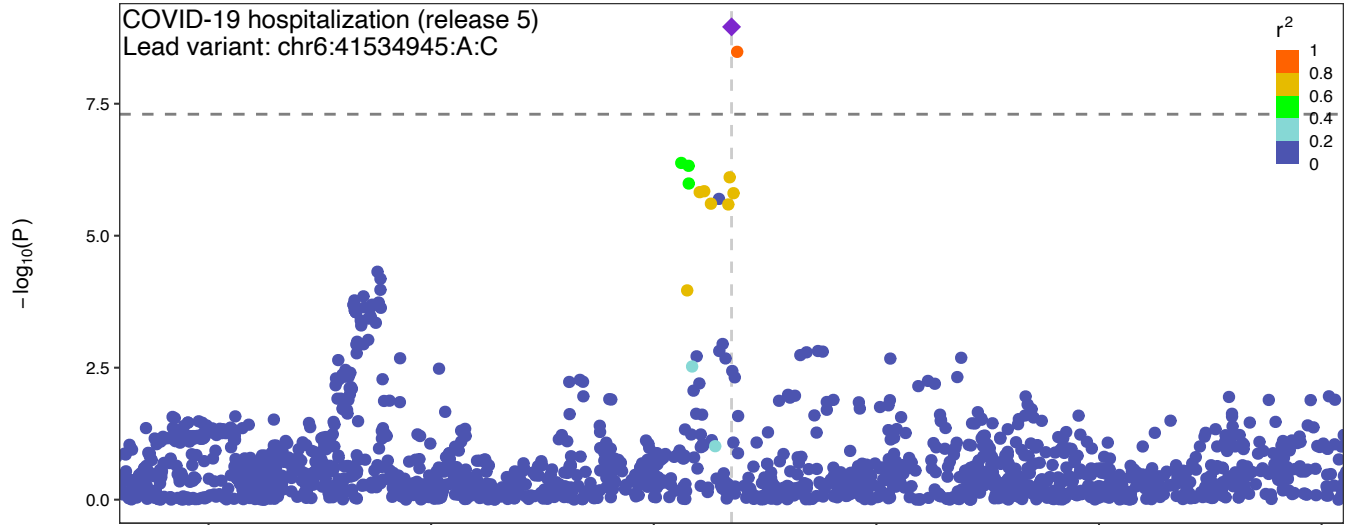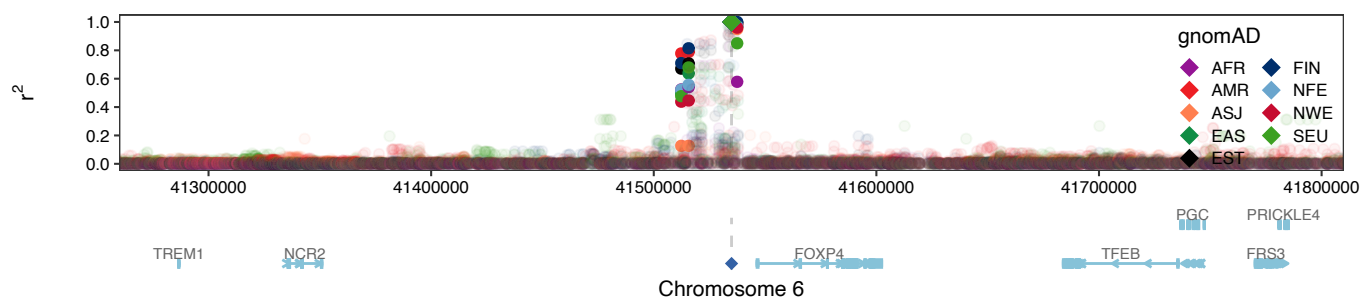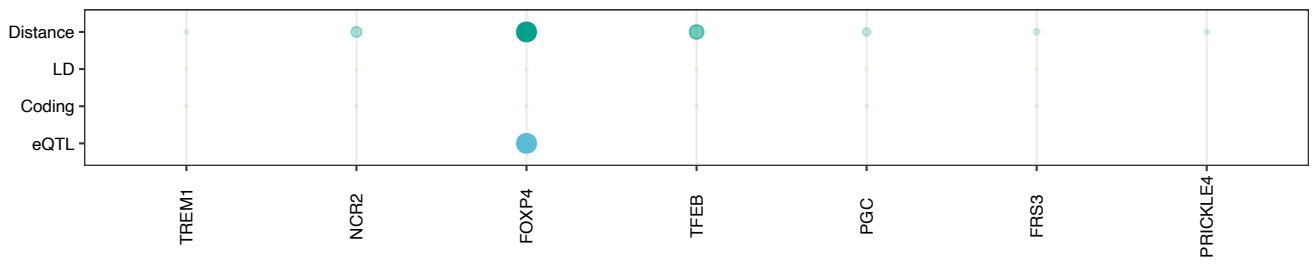



COVID-19 hospitalization (release 5)  
Lead variant: chr8:124324323:T:C

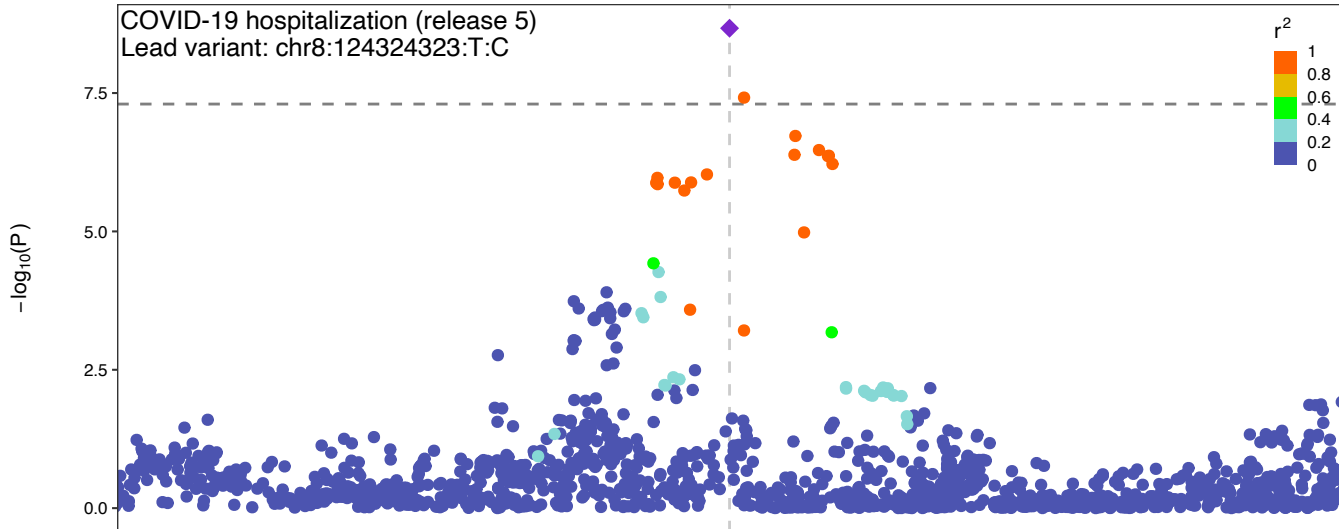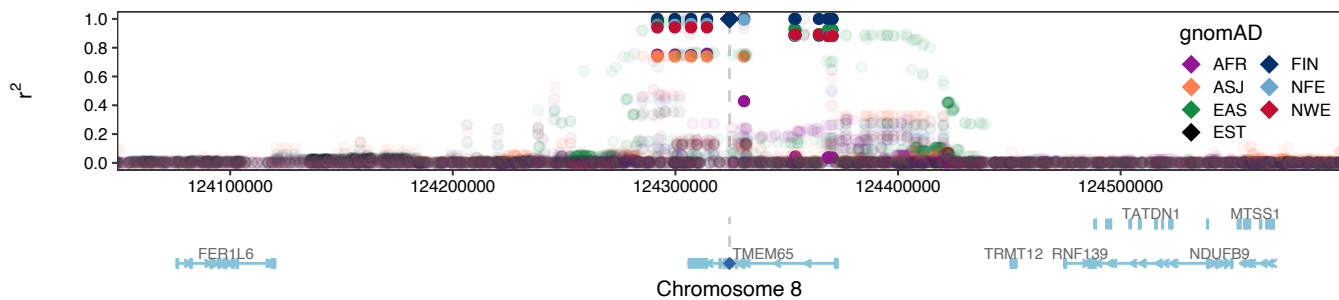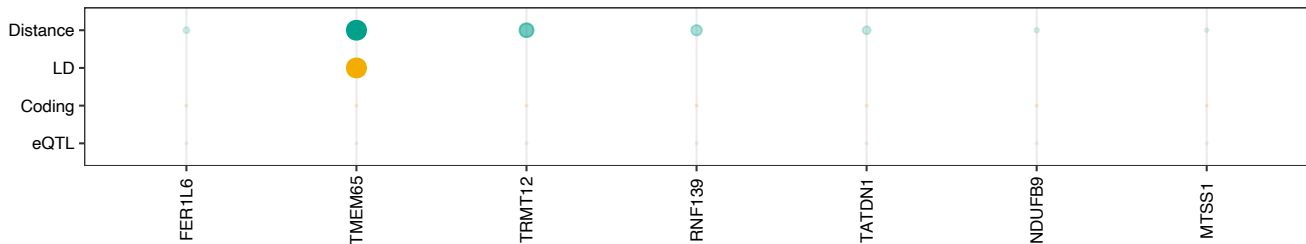

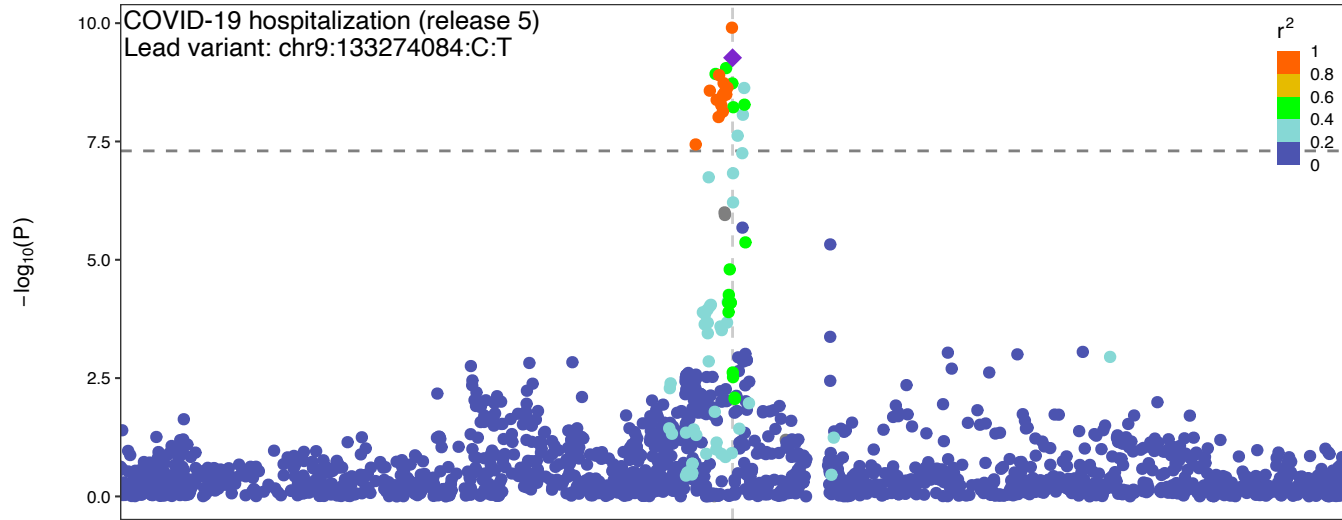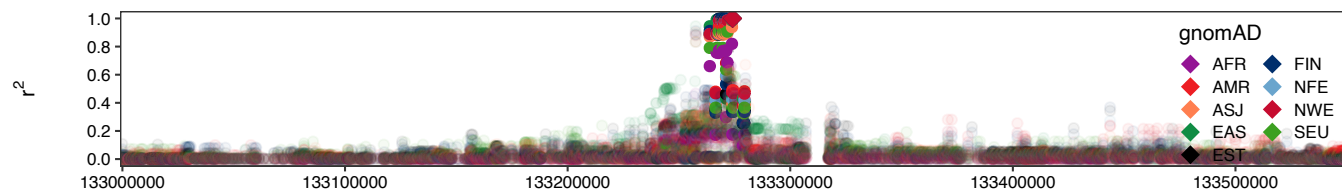

133000000 133100000 133200000 133300000 133400000 133500000

GTF3C5 CEL RALGDS GBGT1 OBP2B ABO SURF2 SURF1 MED22 SURF4 STKLD1 REXO4 ADAMTS13 SLC2A6 CACFD1 MYMK

Chromosome 9

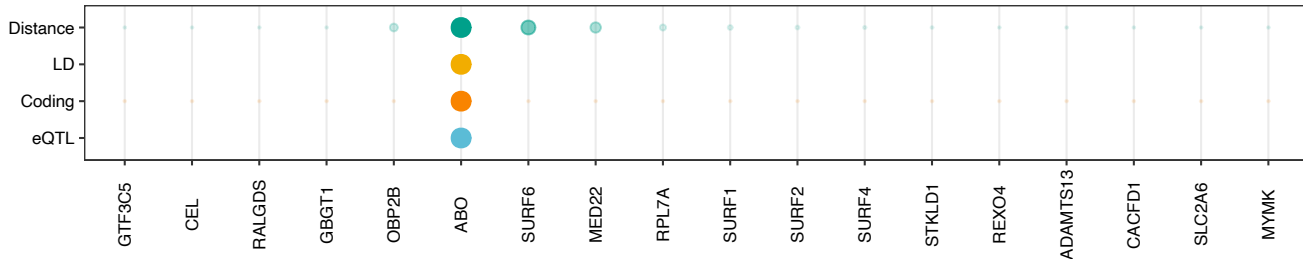

COVID-19 hospitalization (release 5)  
Lead variant: chr12:112919388:G:A

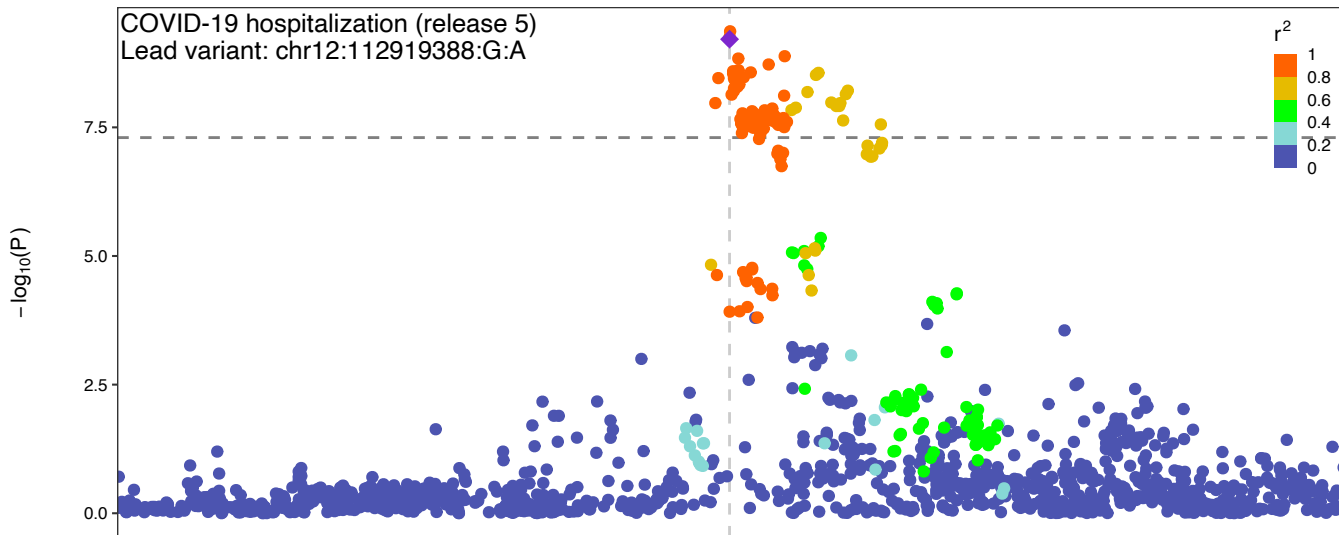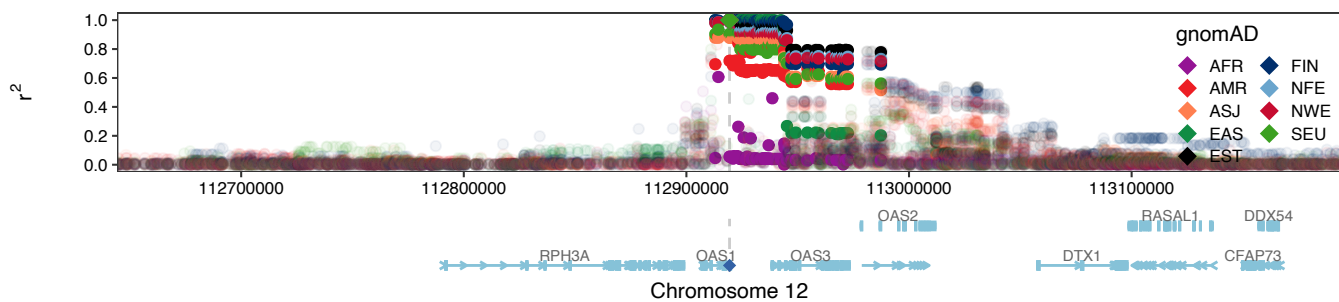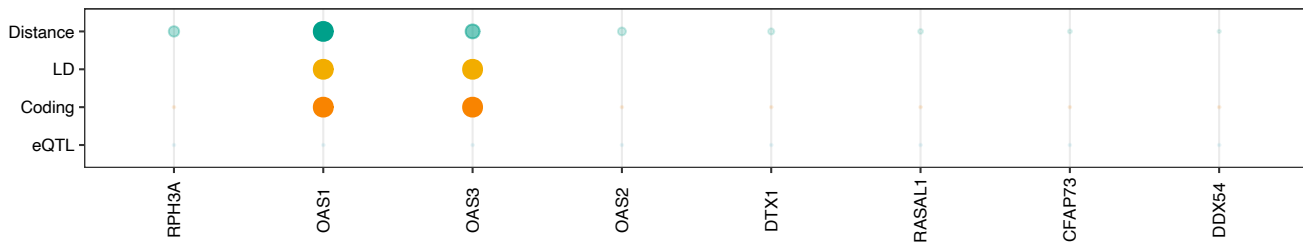

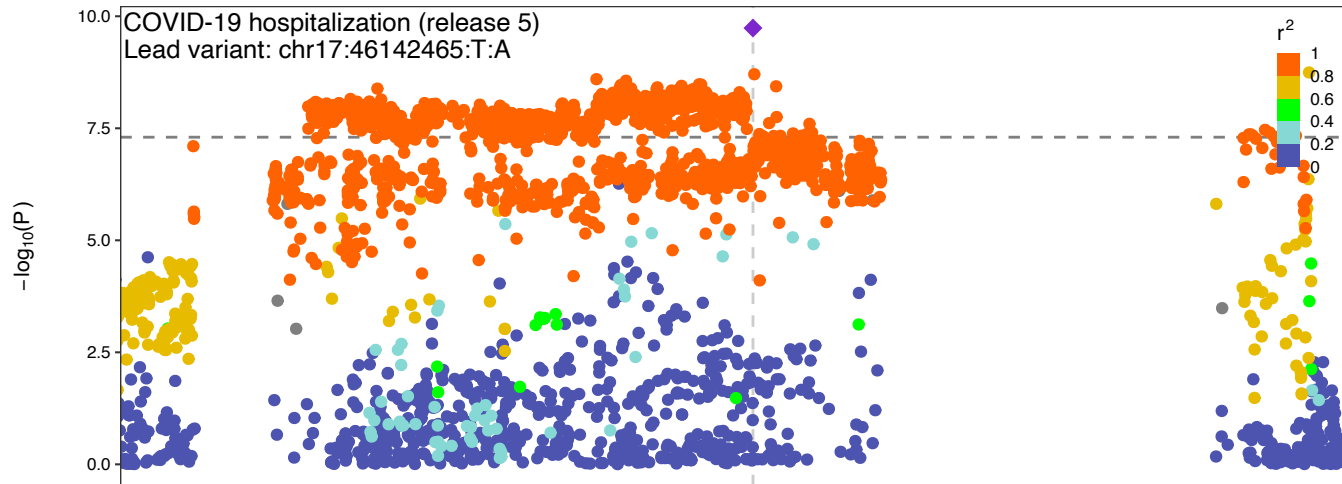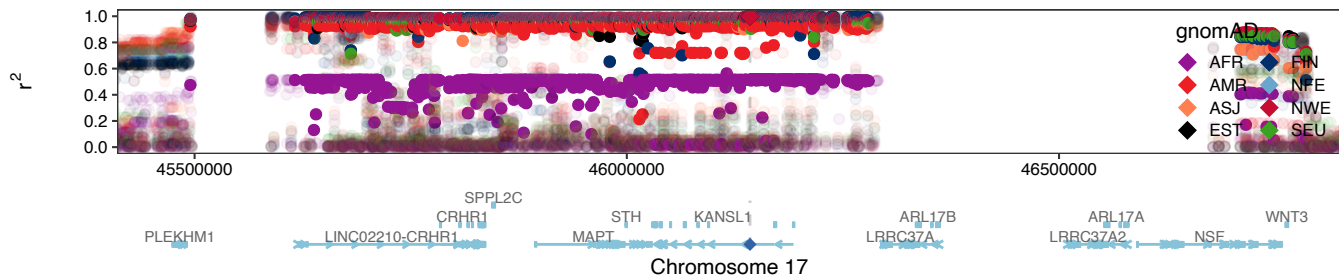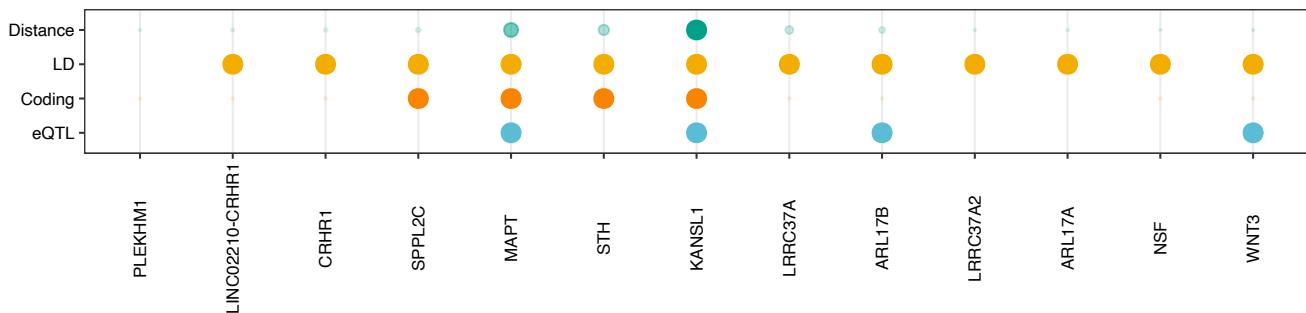

# COVID-19 hospitalization (release 5)

Lead variant: chr19:4719431:G:A

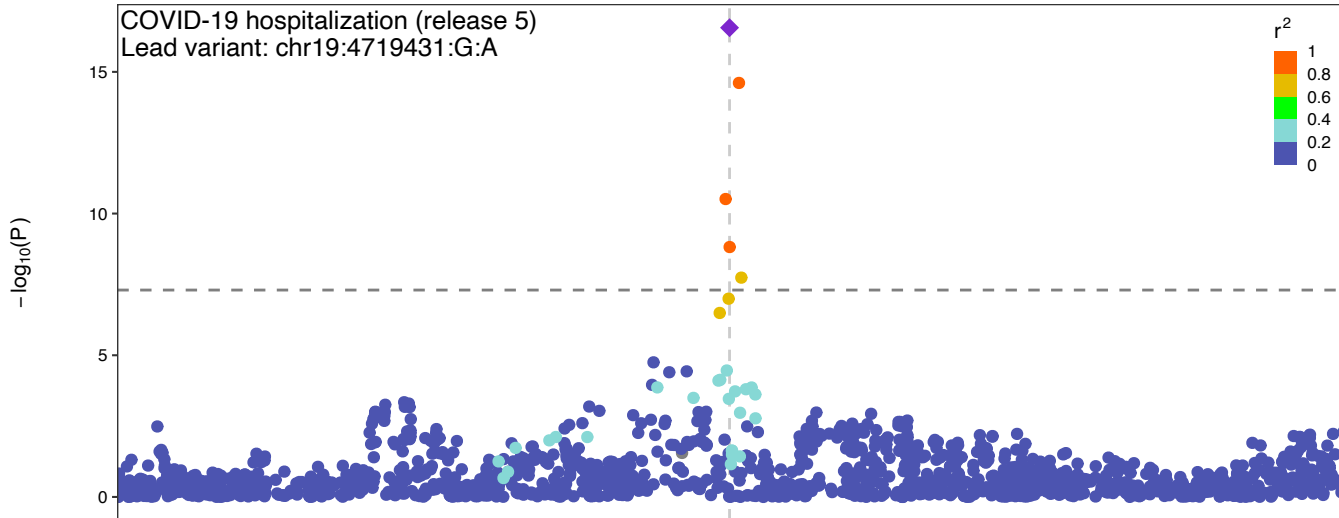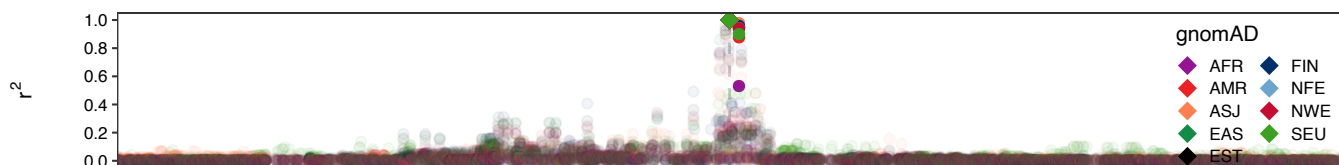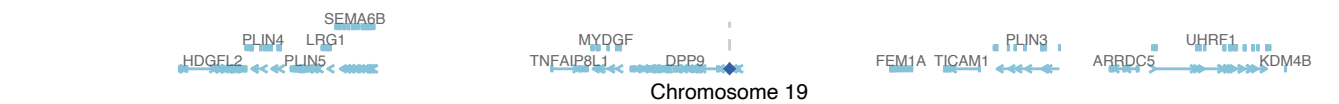

# COVID-19 hospitalization (release 5)

Lead variant: chr19:10317045:T:A

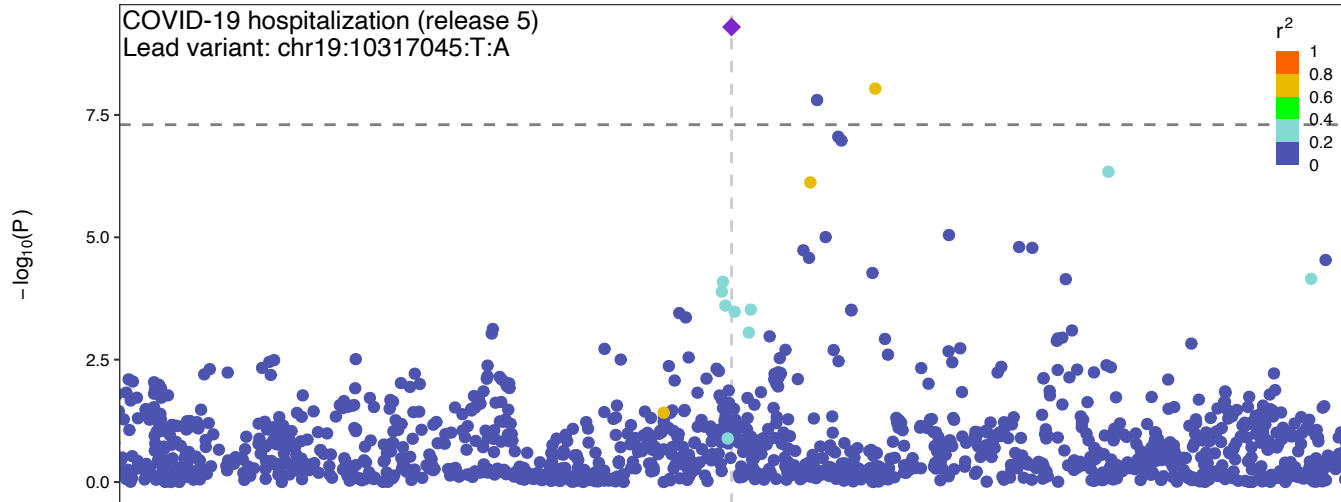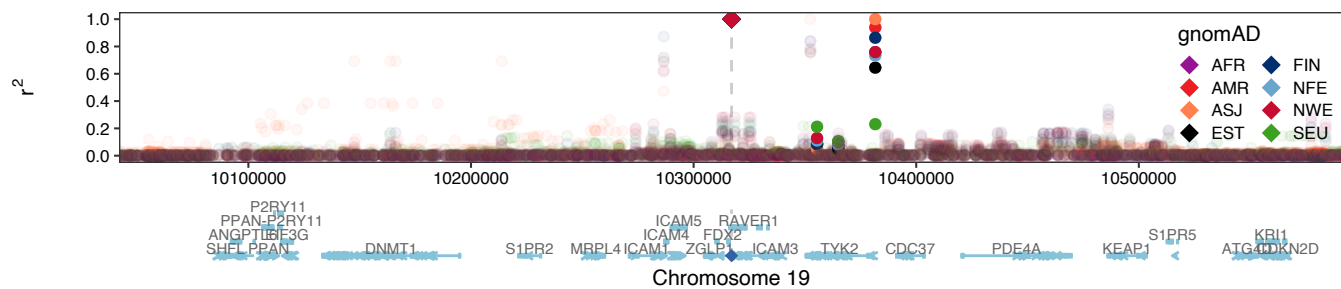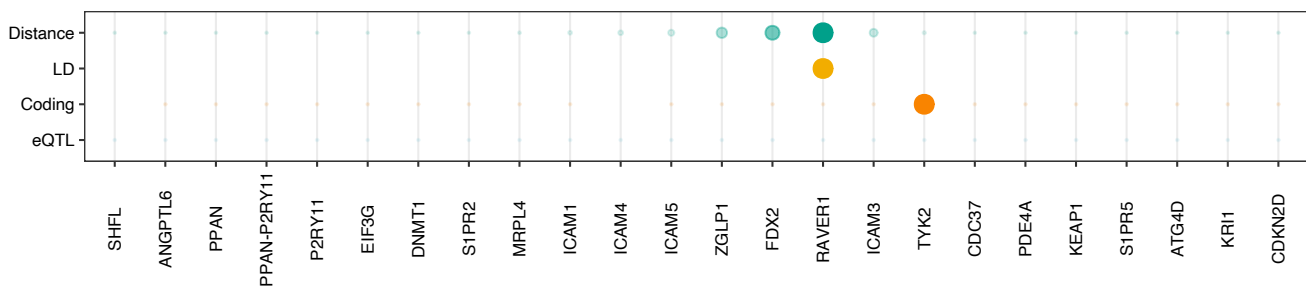

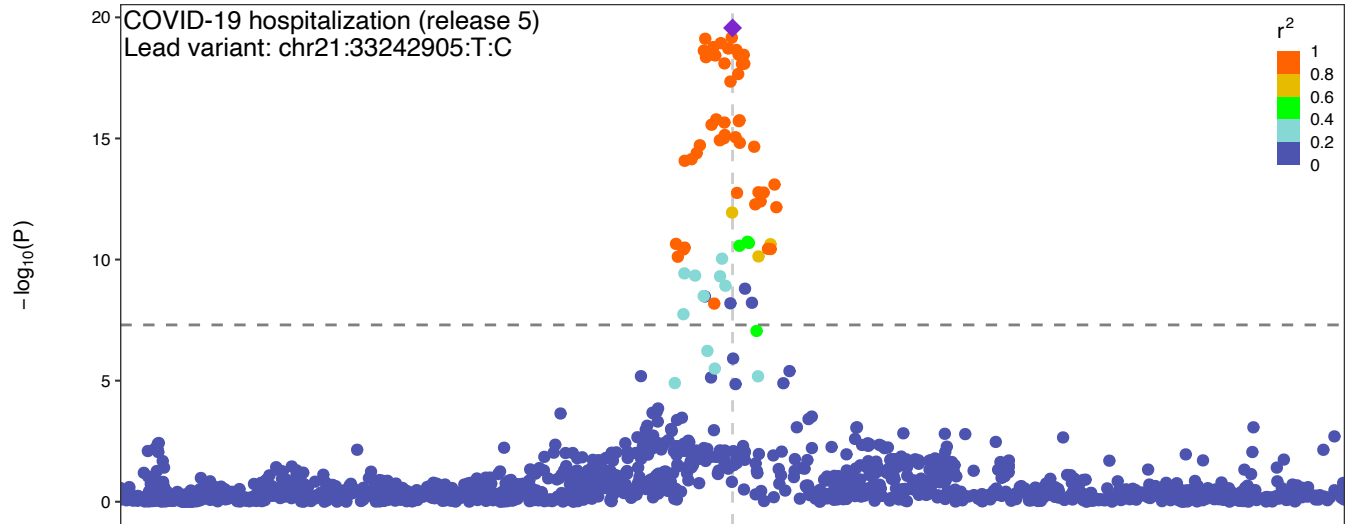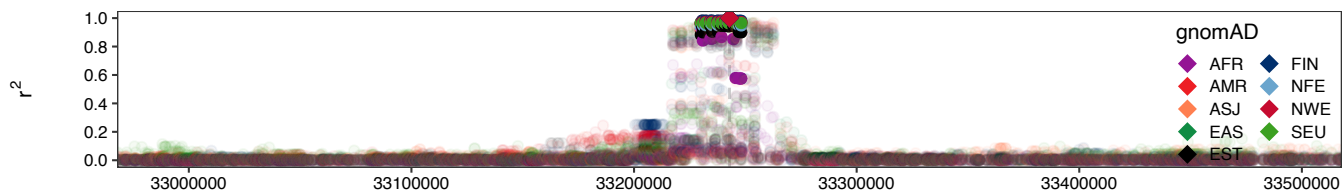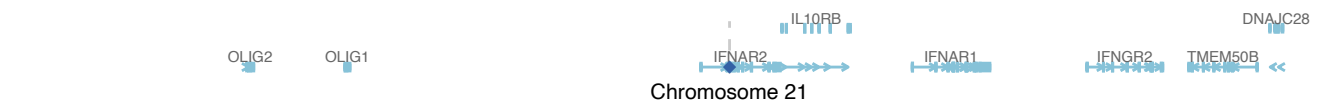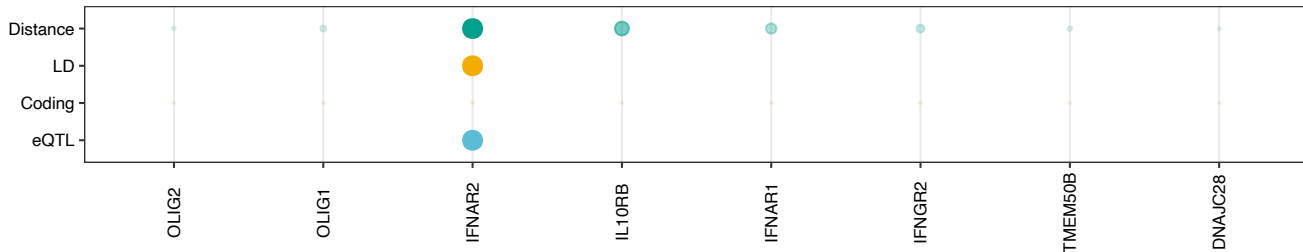

COVID-19 reported infection (release 5)  
Lead variant: chr3:45823240:T:C

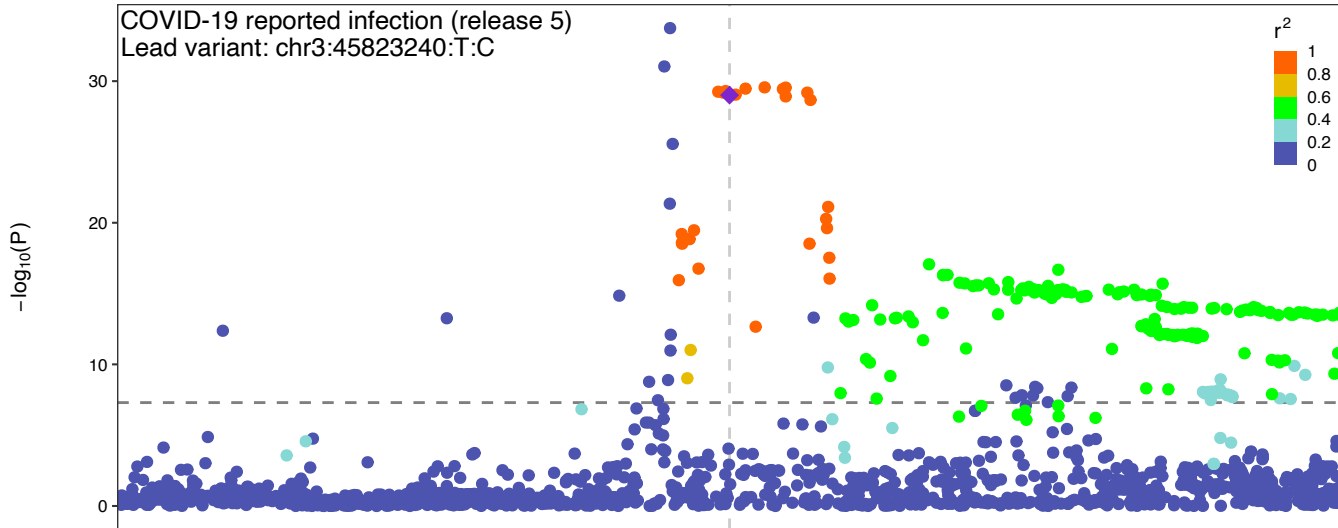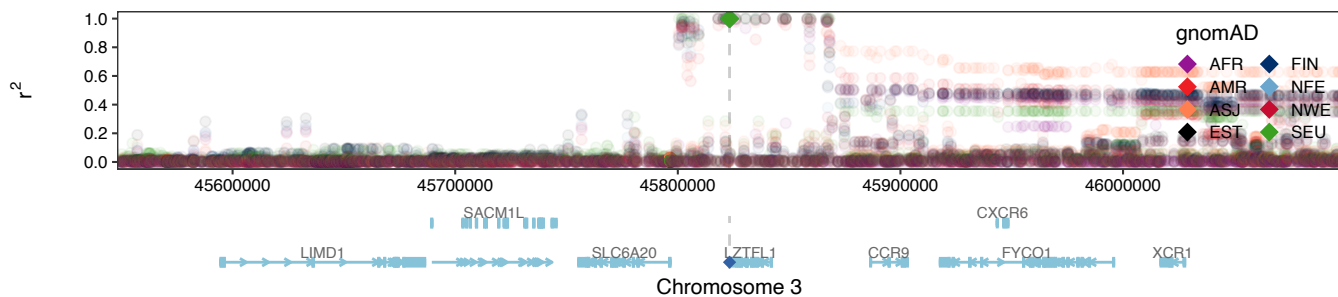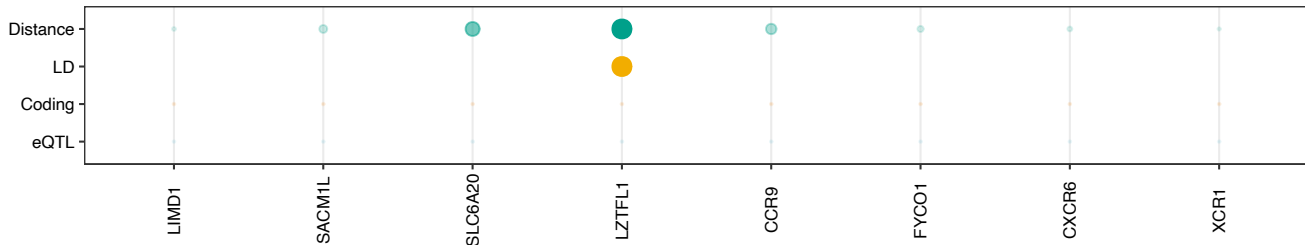



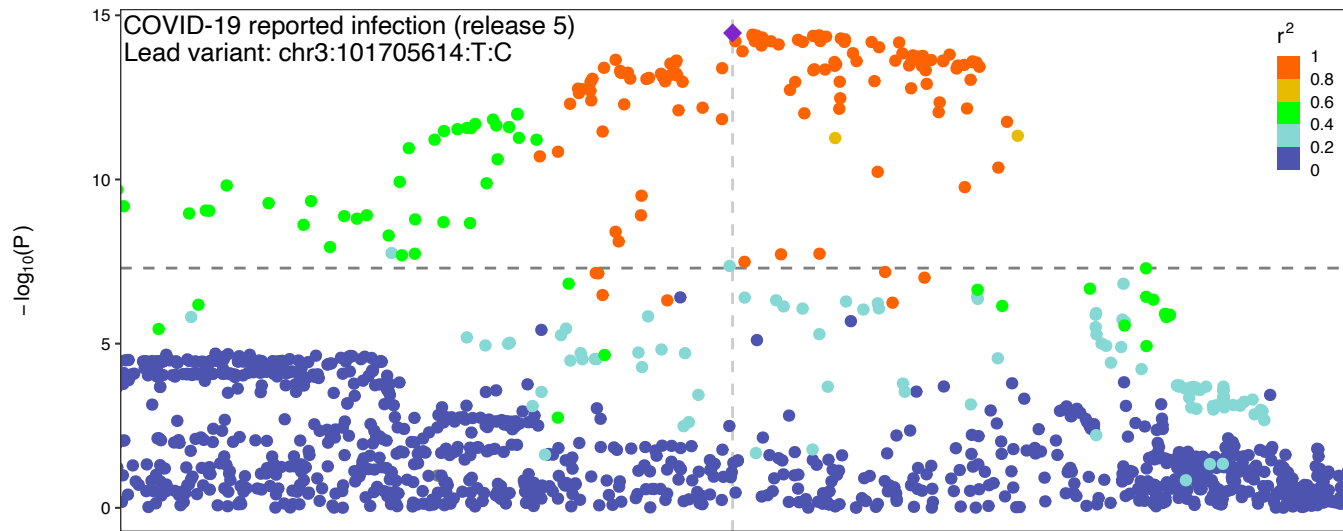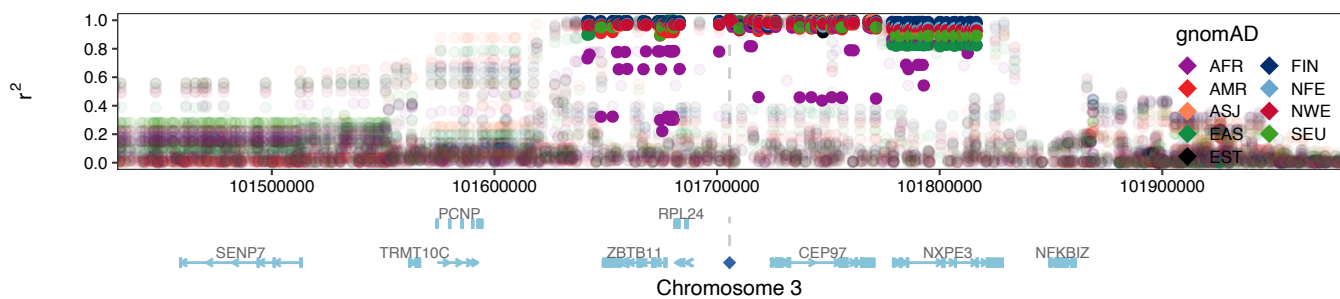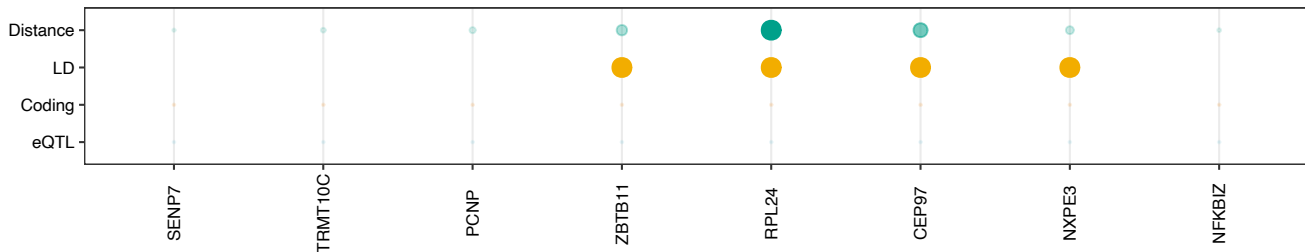

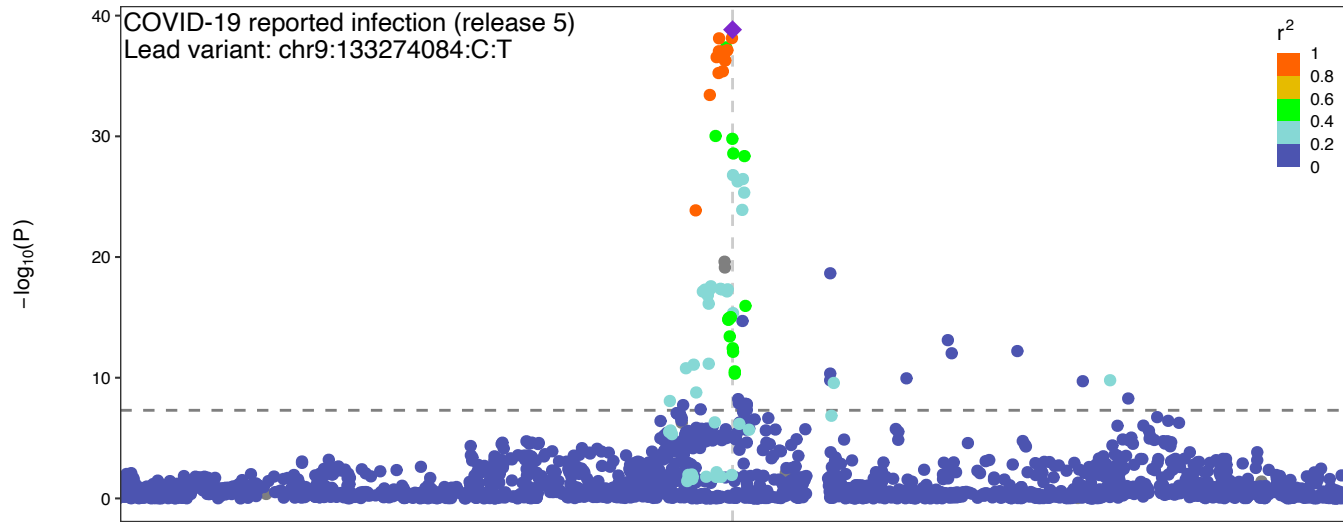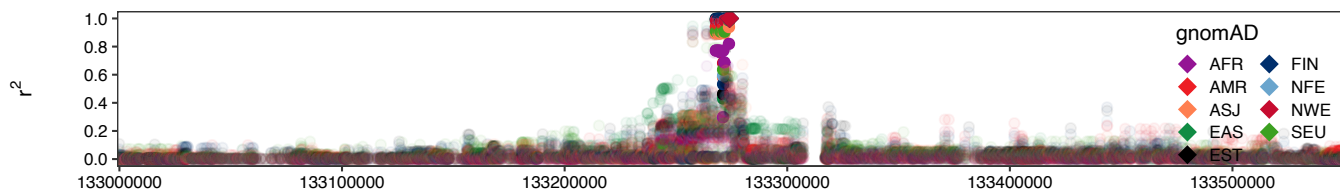

133000000 133100000 133200000 133300000 133400000 133500000

GTF3C5 CEL RALGDS GBGT1 OBP2B ABO SURF2 SURF1 SURF4 STKLD1 REXO4 ADAMTS13 SLC2A6 CACFD1 MYMK

Chromosome 9

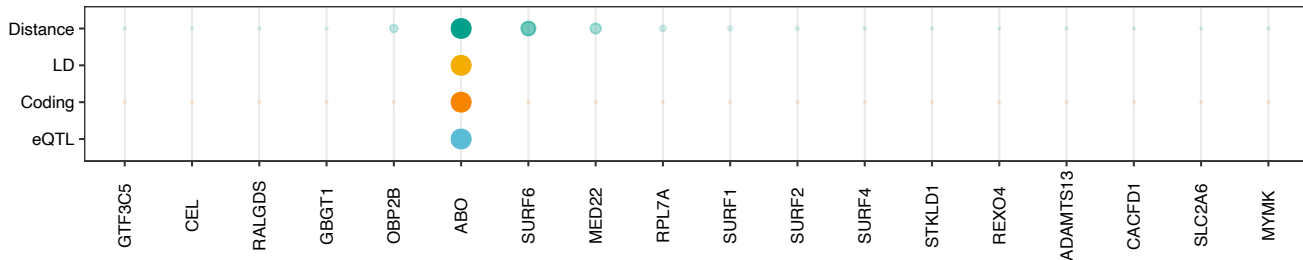

COVID-19 reported infection (release 5)  
Lead variant: chr12:112919388:G:A

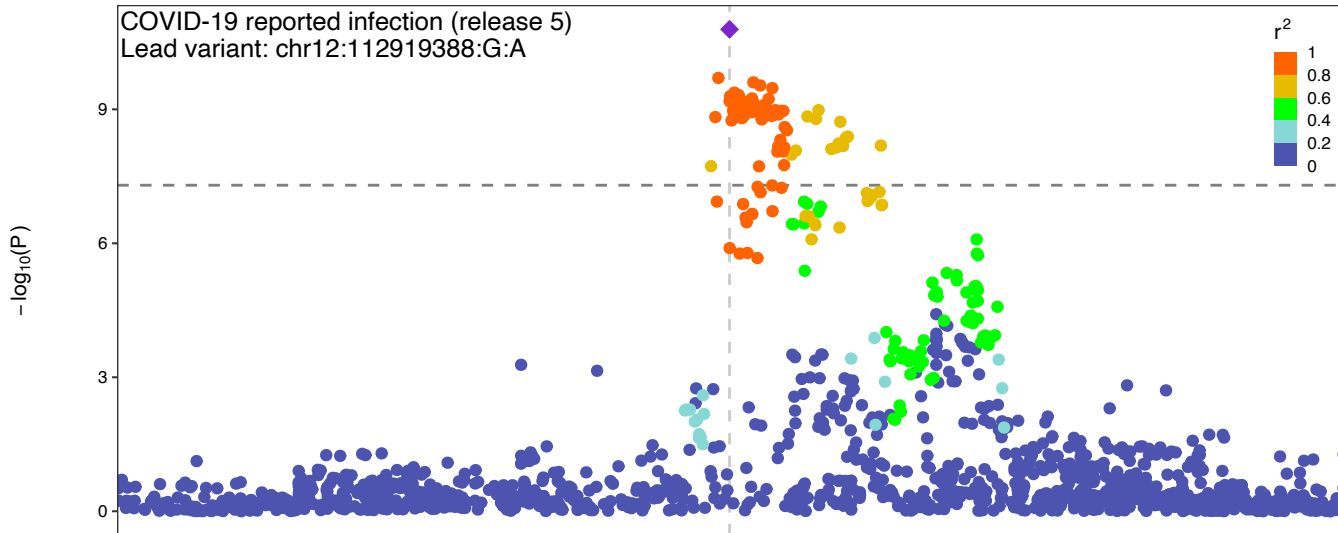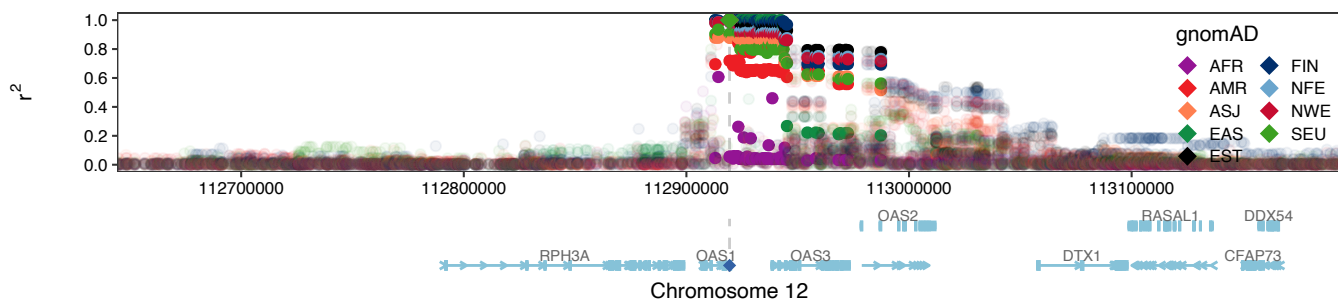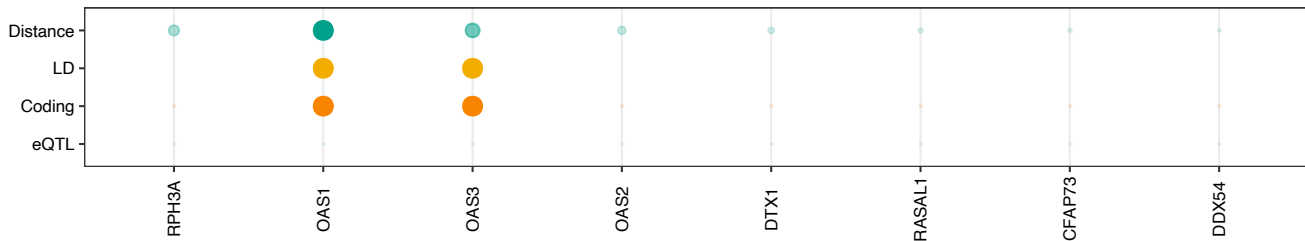

COVID-19 reported infection (release 5)

Lead variant: chr19:4719431:G:A

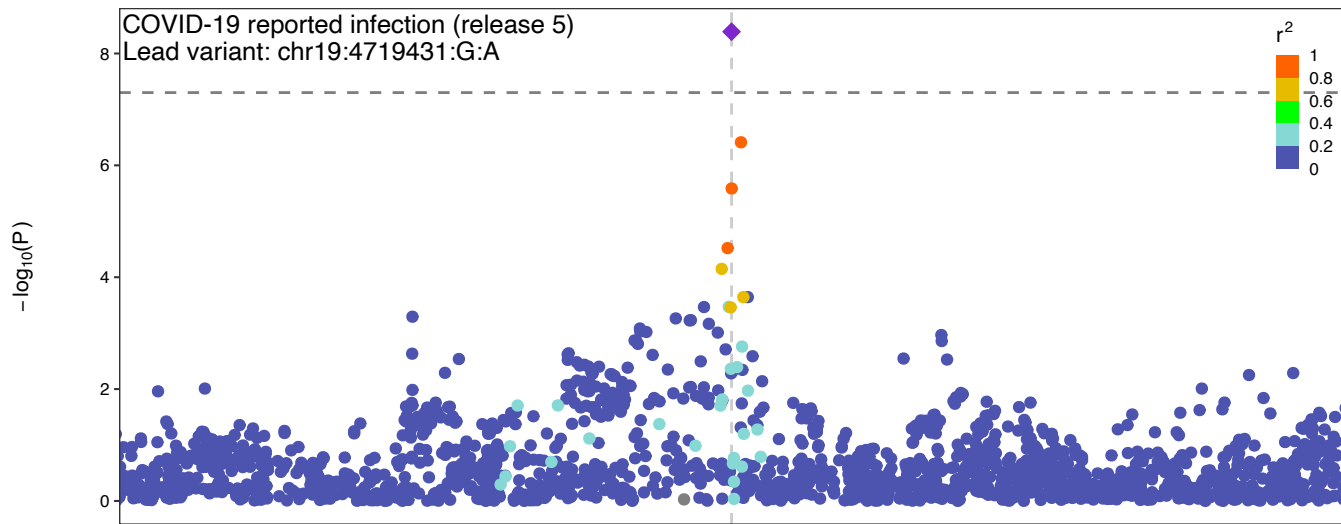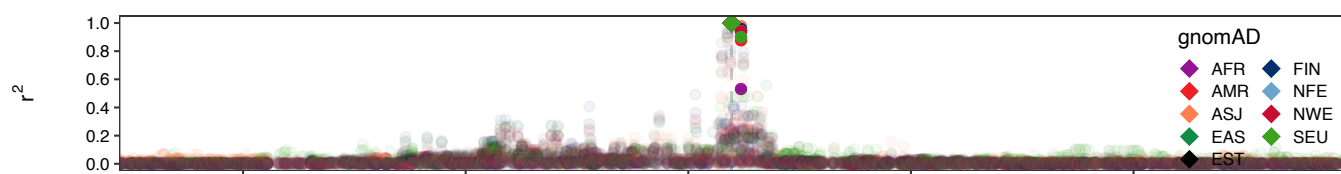

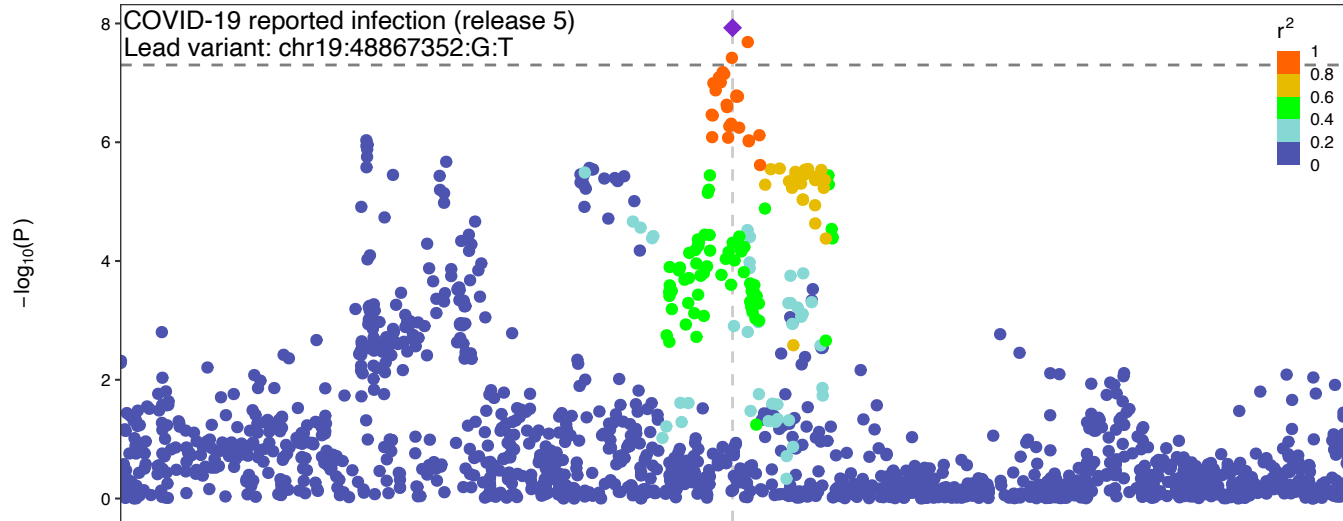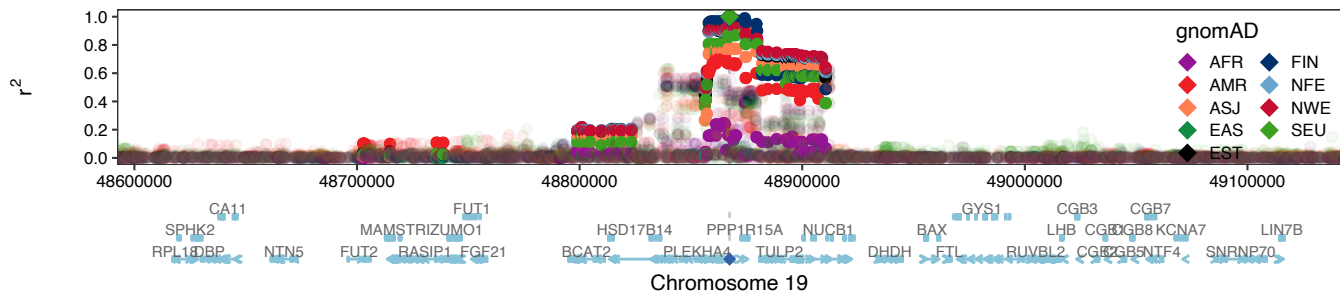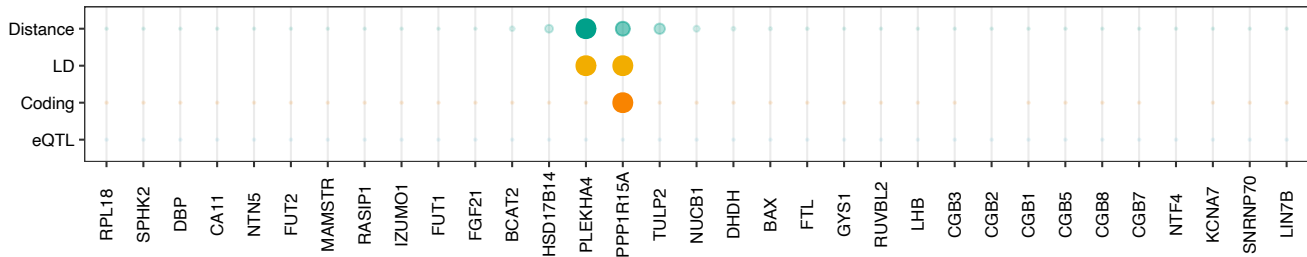

Supplement: 41586_2021_3767_MOESM4_ESM.pdf [file 41586_2021_3767_MOESM4_ESM.pdf]
