# Supplementary material for: Mapping the human genetic architecture of COVID-19
Source: Springer Nature journal article supplement (doi:10.1038/s41586-021-03767-x), 2021-07-08

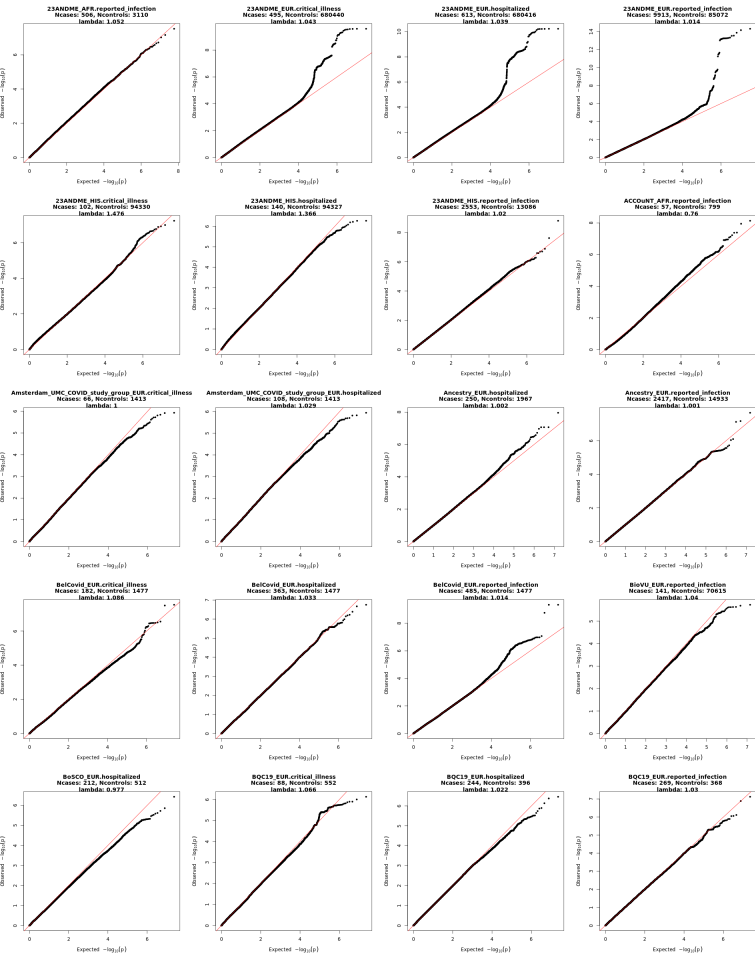

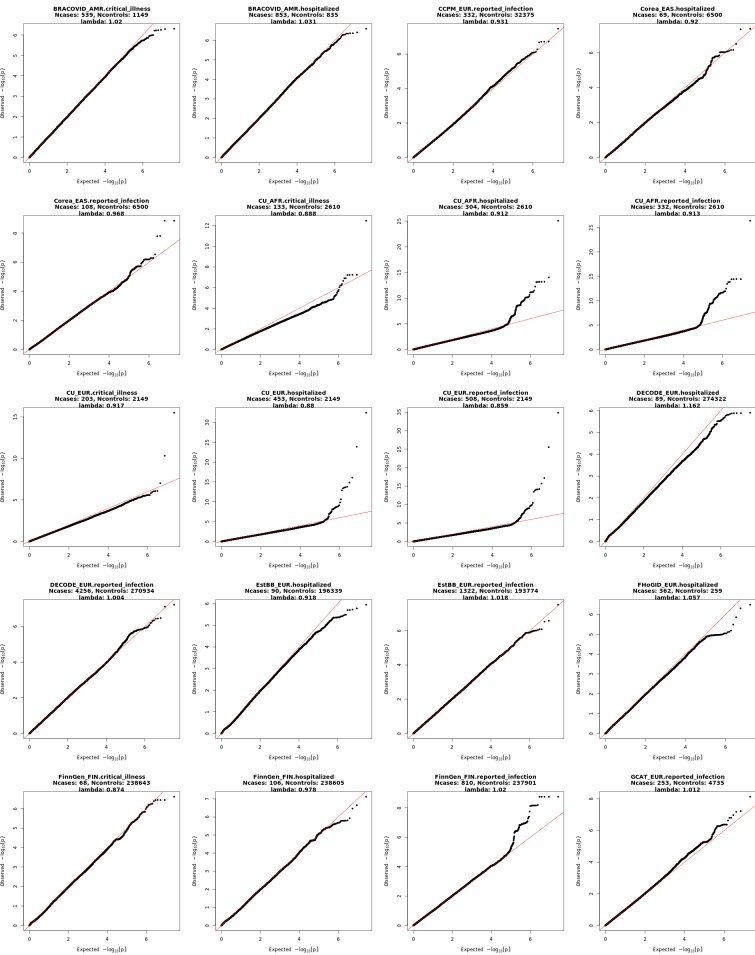

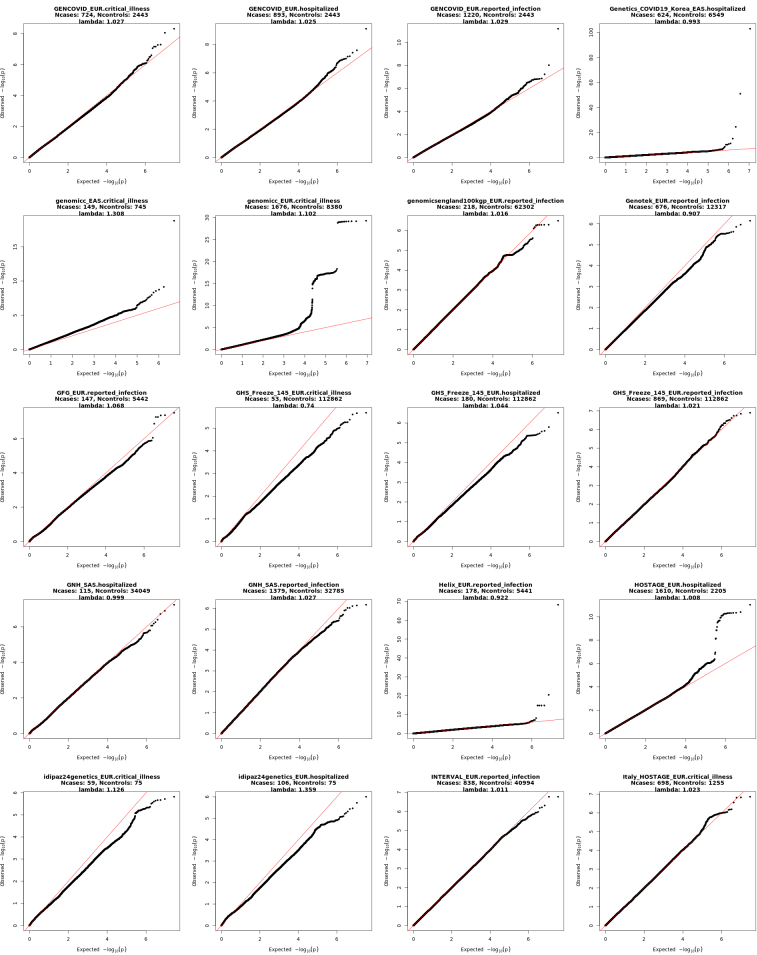

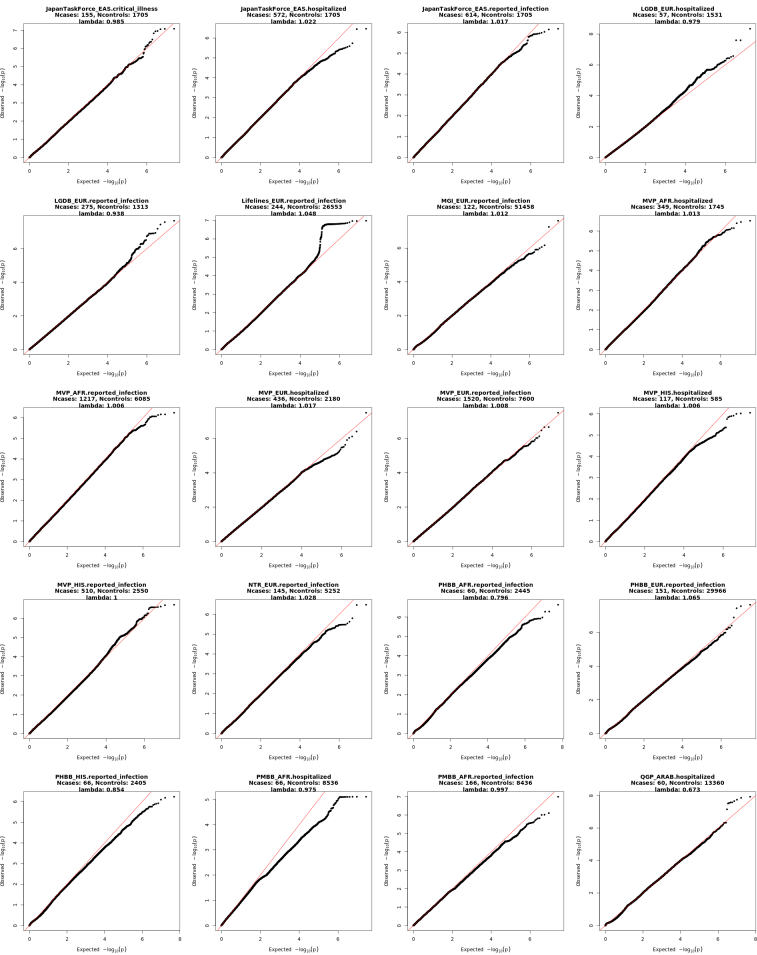

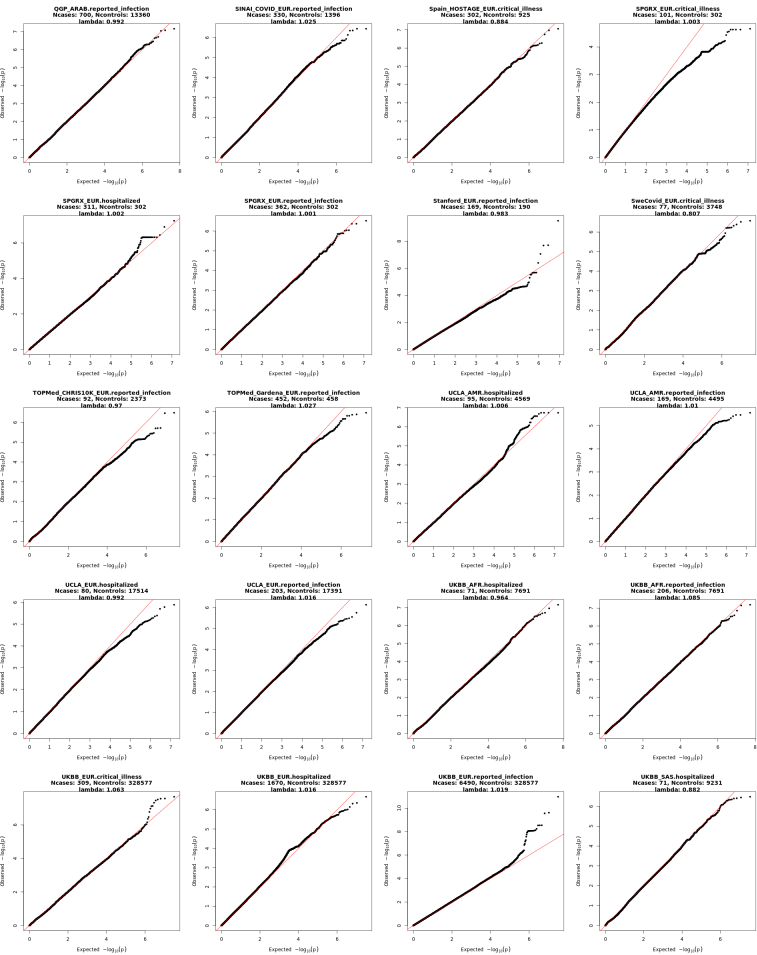

UKBB\_SAS\_reported\_infection  
Ncases: 309, Ncontrols: 9231  
lambda: 1.061

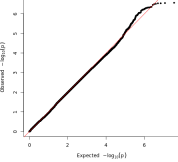

Supplement: 41586_2021_3767_MOESM3_ESM.pdf [file 41586_2021_3767_MOESM3_ESM.pdf]
