# Supplementary material for: Mapping the human genetic architecture of COVID-19
Source: Springer Nature journal article supplement (doi:10.1038/s41586-021-03767-x), 2021-07-08
Supplement: 41586_2021_3767_MOESM5_ESM.pdf [file 41586_2021_3767_MOESM5_ESM.pdf]

Idiopathic pulmonary fibrosis – Critical illness

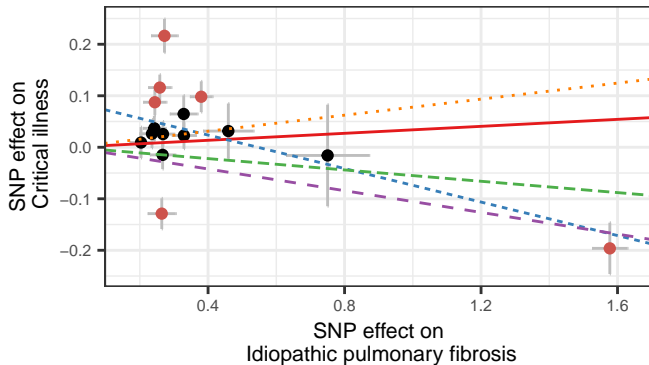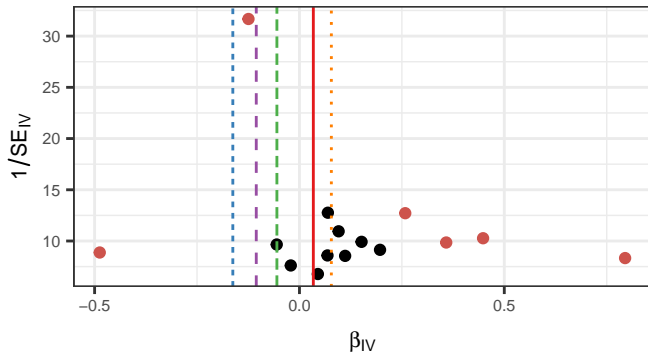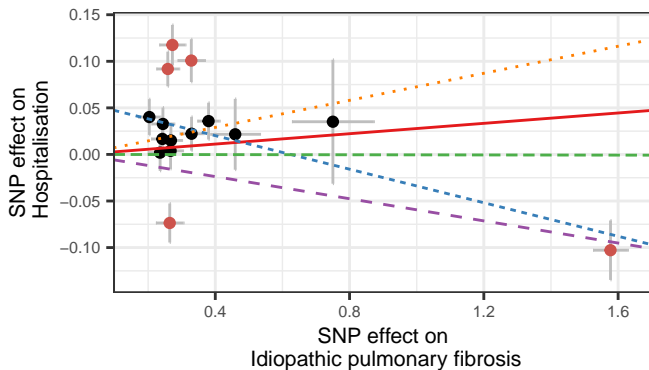

Idiopathic pulmonary fibrosis – Hospitalisation

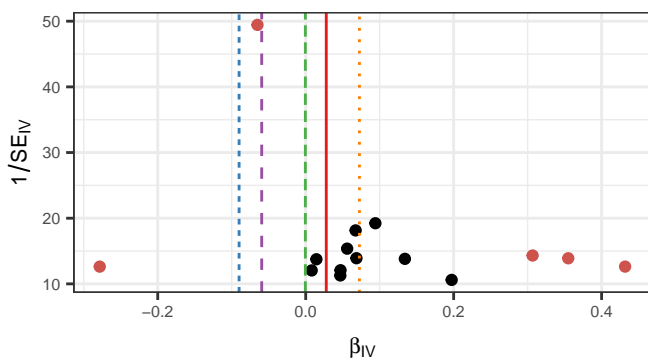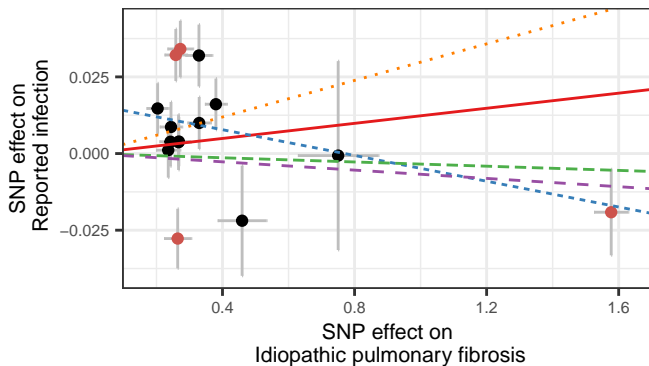

Idiopathic pulmonary fibrosis – Reported infection

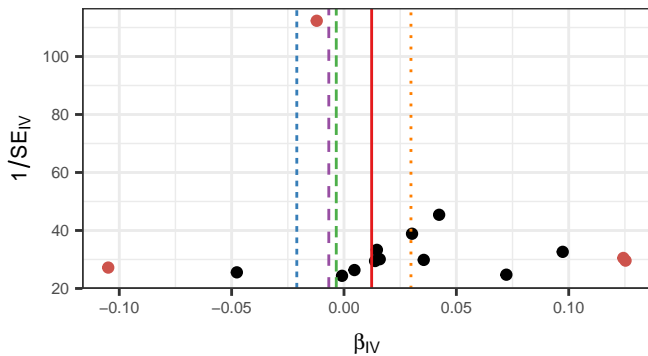

method — IVW - - - Egger - - - WME - - - WMBE · · · MRPRESSO

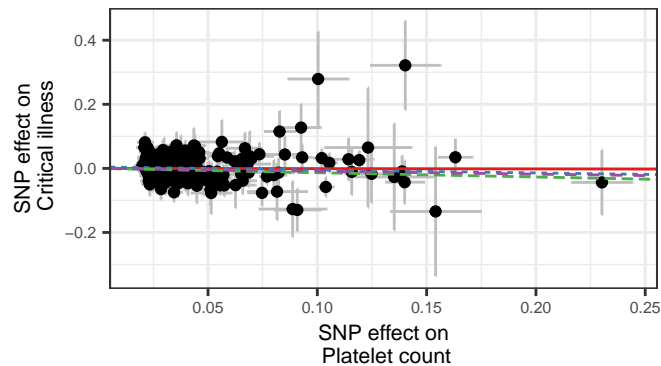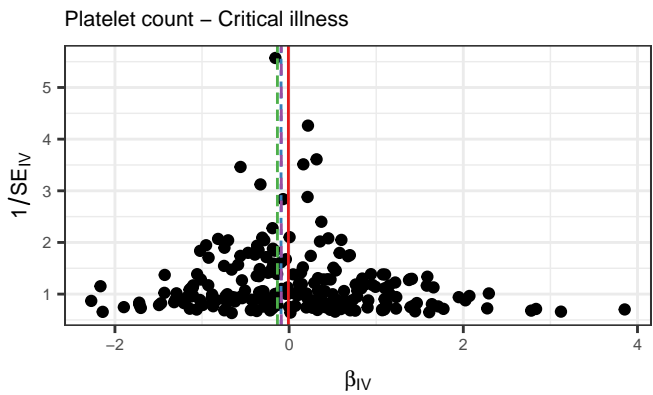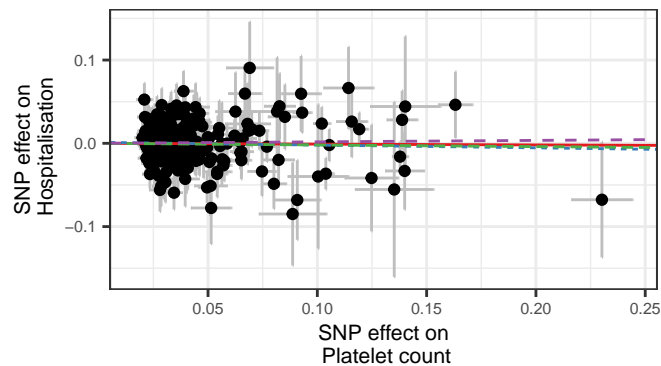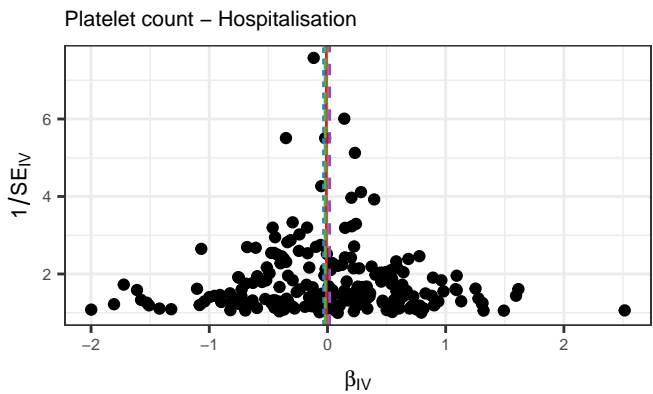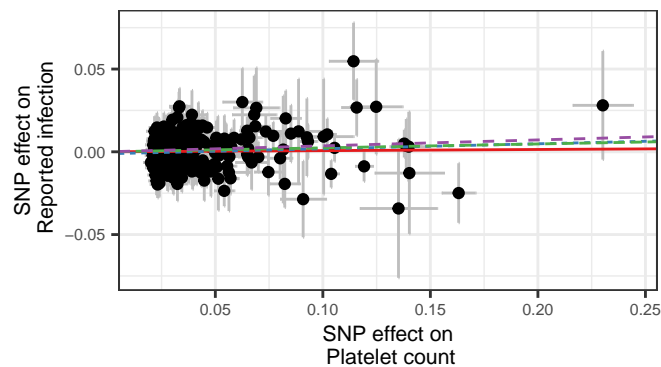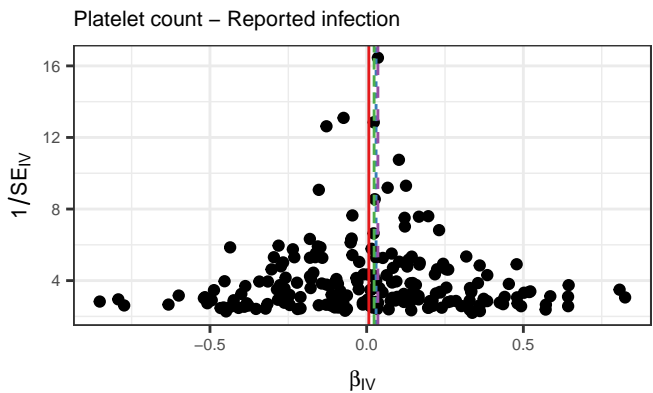

method / IVW / Egger / WME / WMBE / MRPRESSO

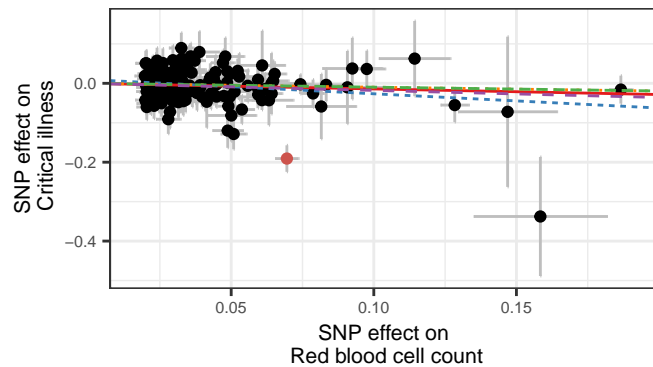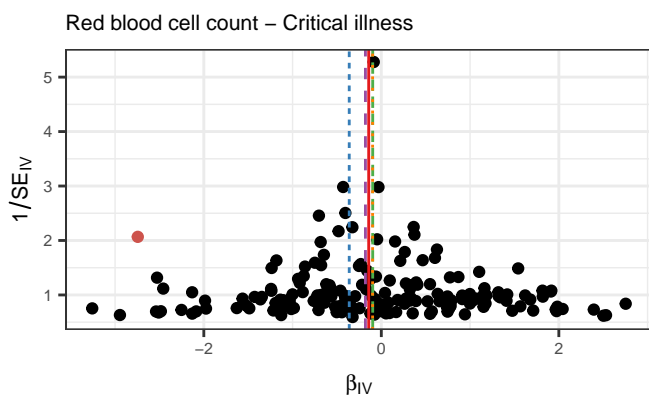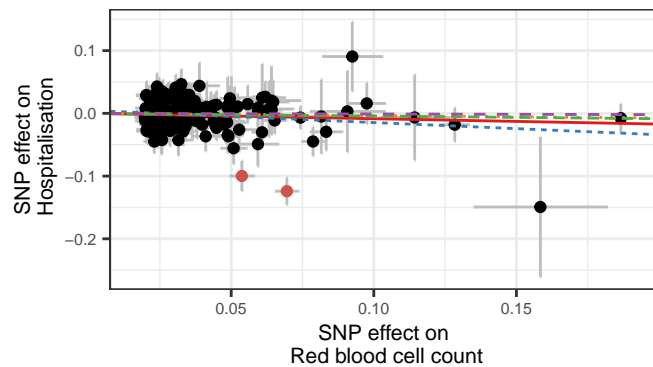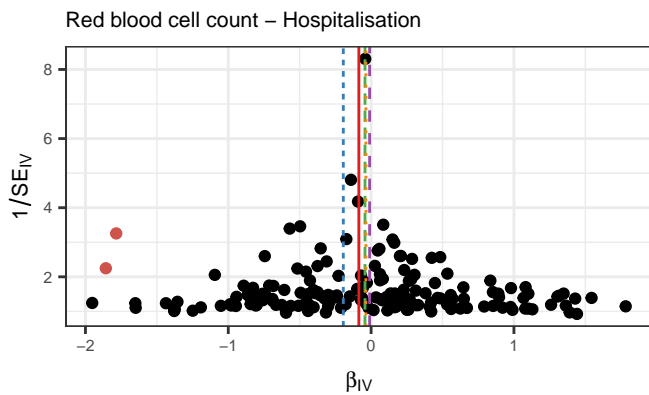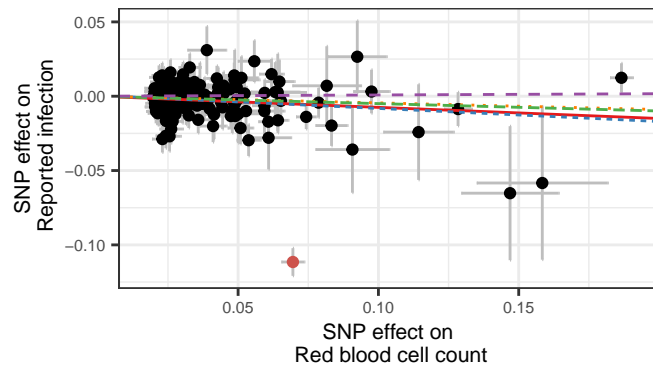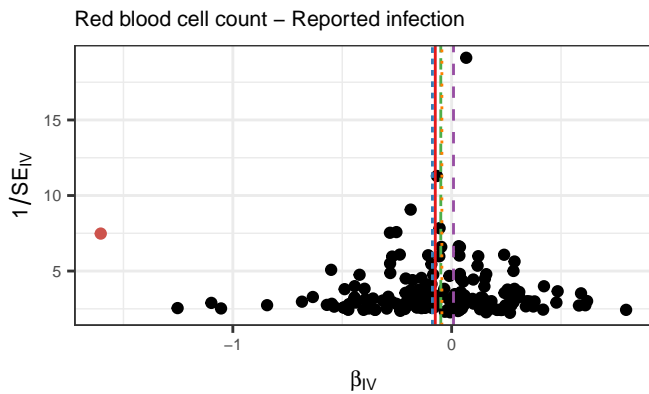

method    — IWW    - - - Egger    - - - WME    - - - WMBE    - - - MRPRESSO

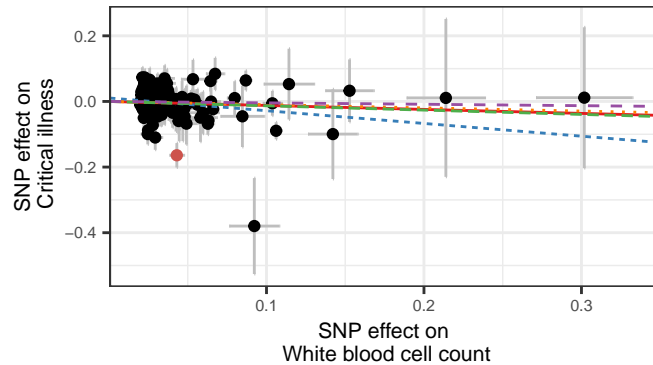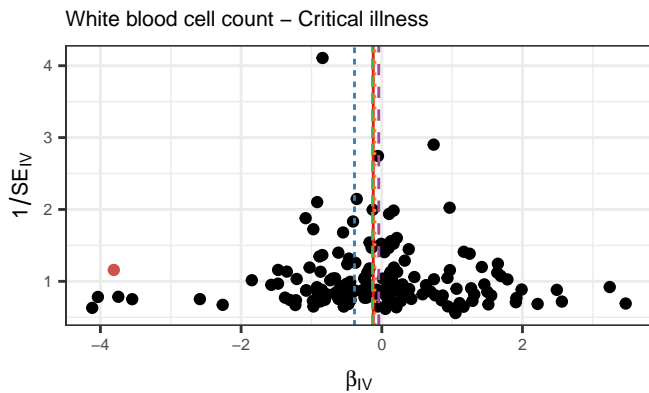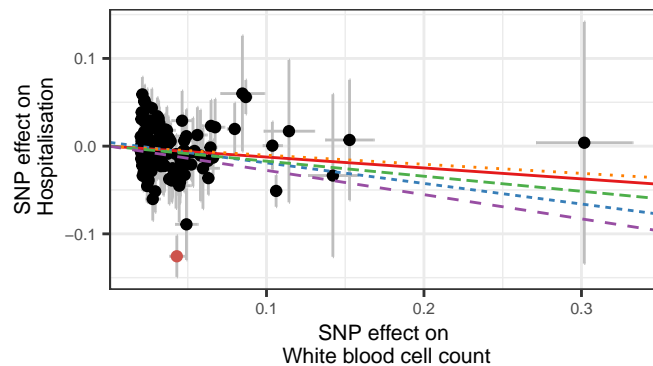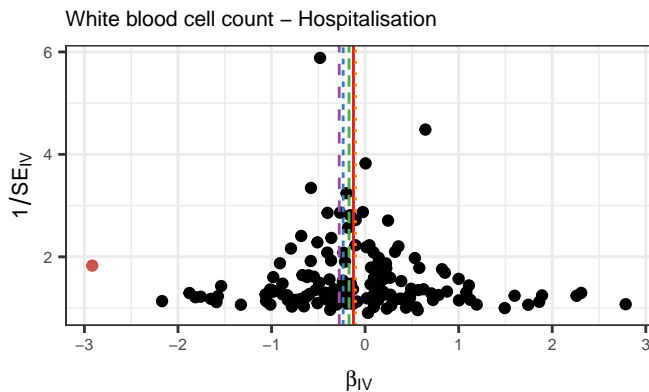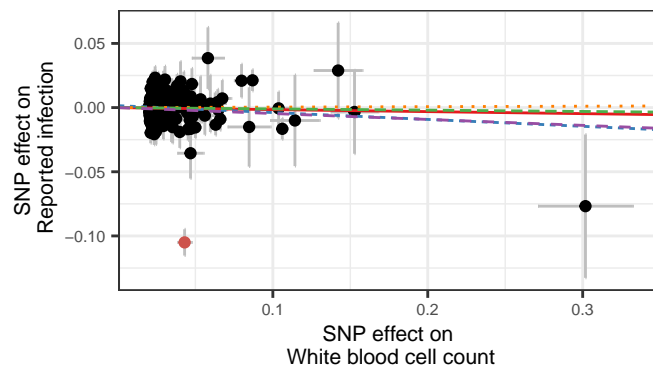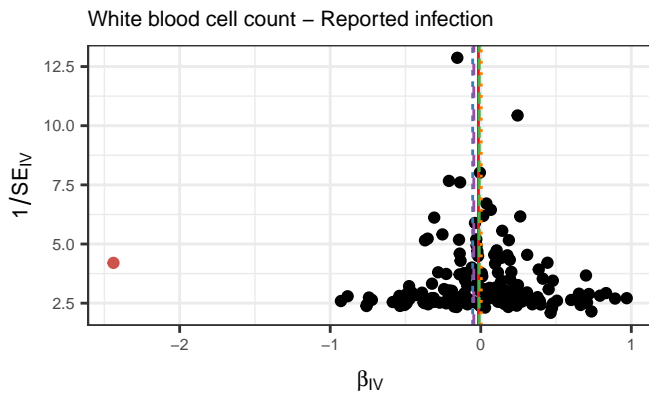

method / IWV - - - Egger / WME - - - WMBE - - - MRPRESSO

Lupus – Critical illness

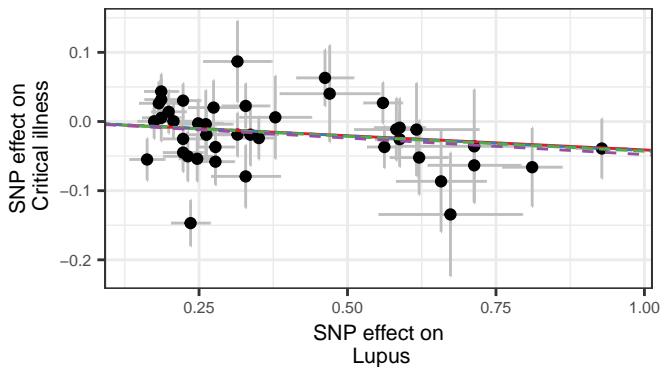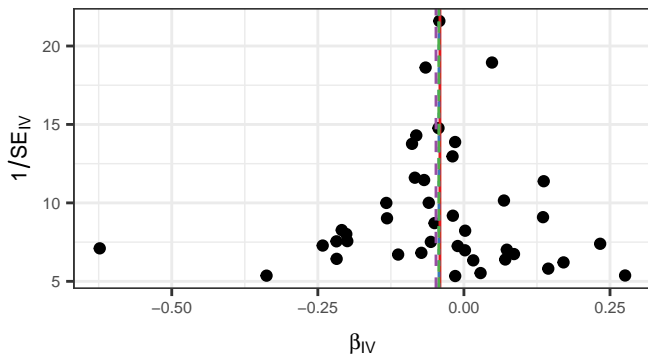

Lupus – Hospitalisation

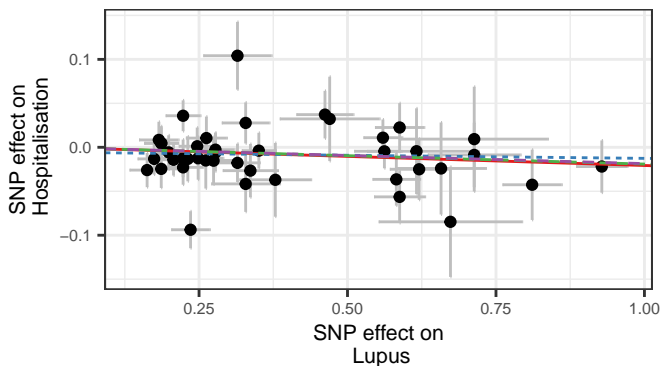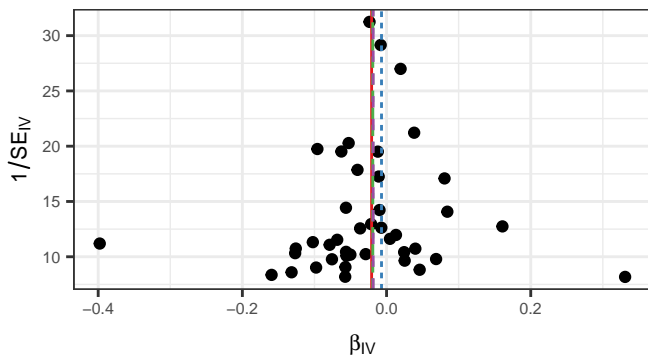

Lupus – Reported infection

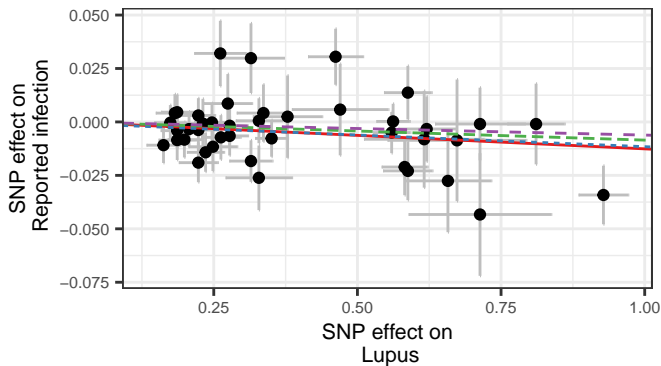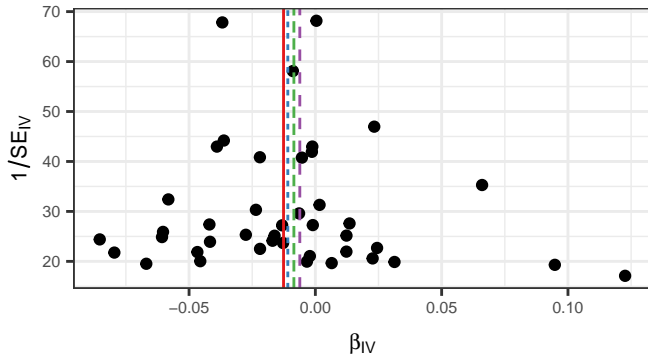

method — IVW — Egger — WME — WMBE — MRPRESSO

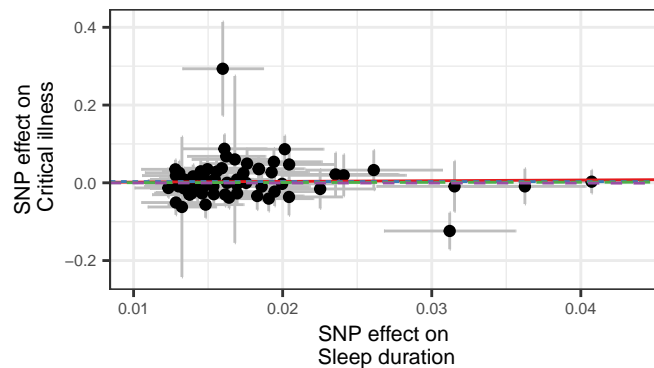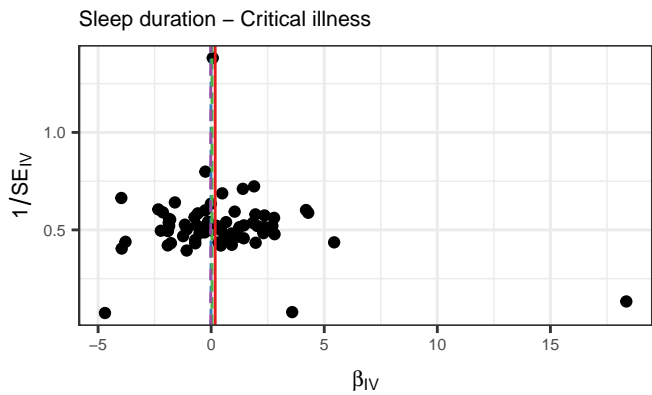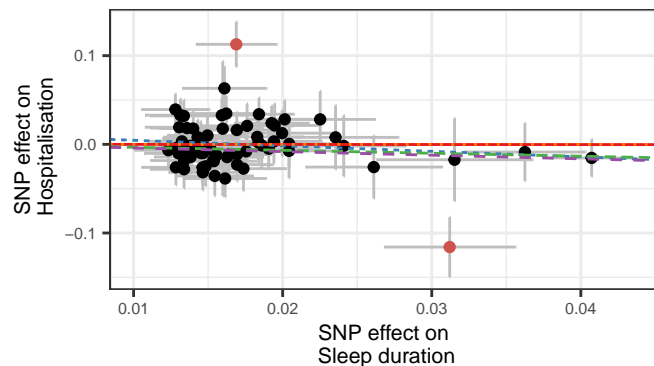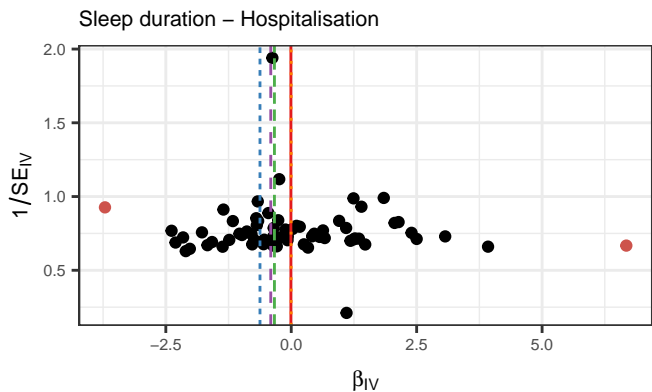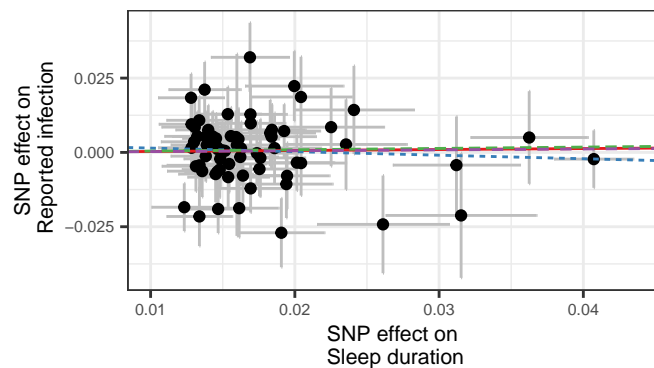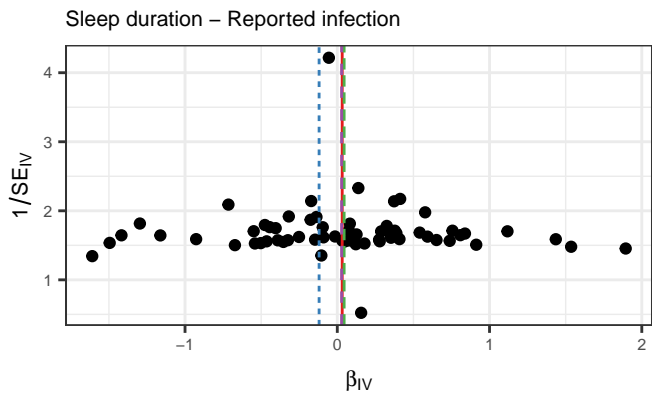

method / IWV - - - Egger - - - WME - - - WMBE - - - MRPRESSO

ADHD – Critical illness

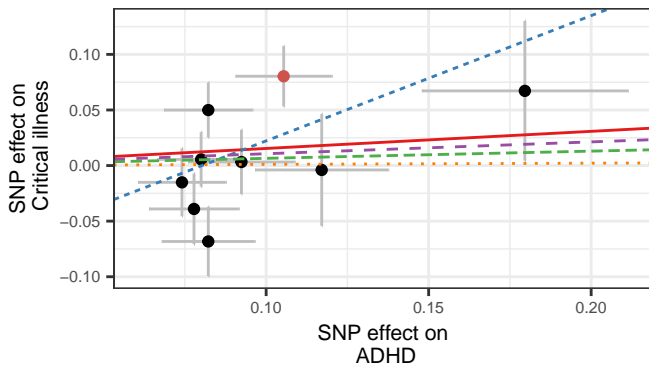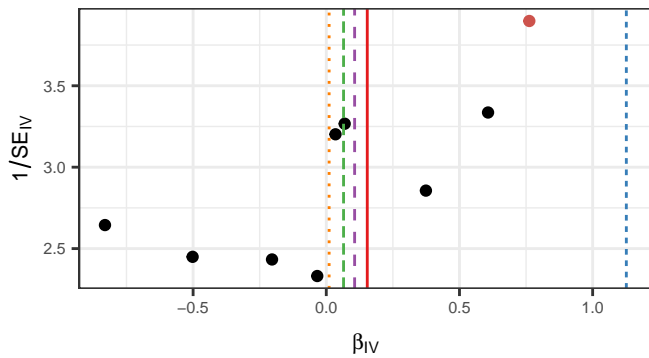

ADHD – Hospitalisation

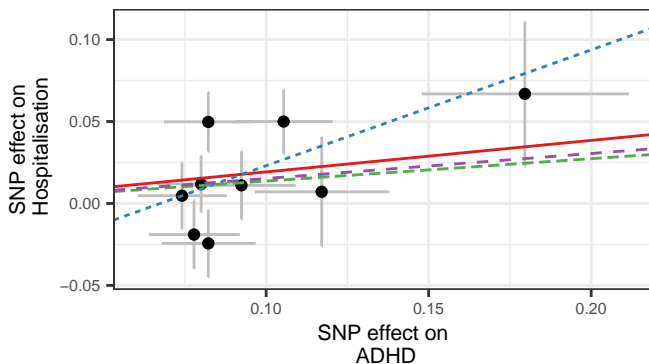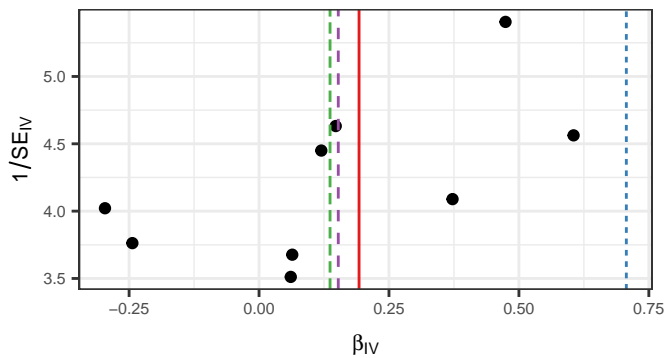

ADHD – Reported infection

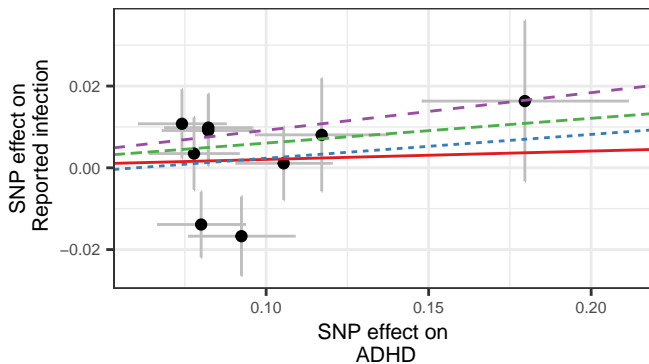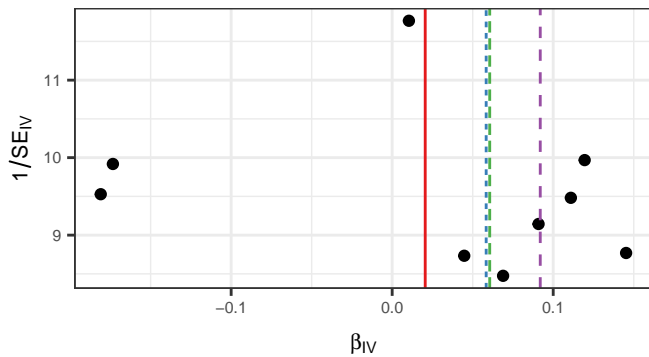

method — IVW - - - Egger - - - WME - - - WMBE - - - MRPRESSO

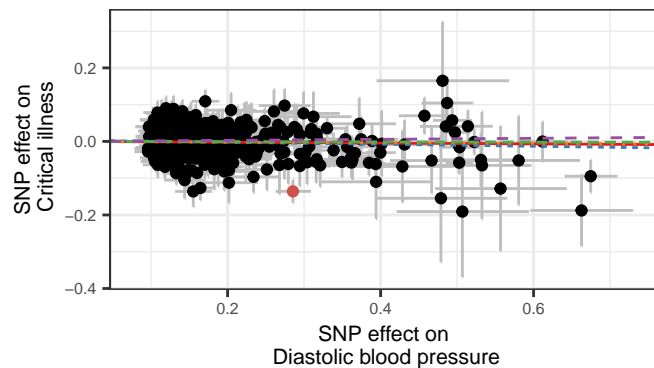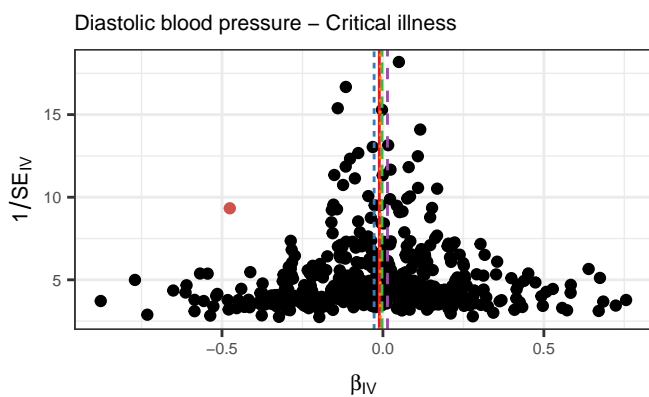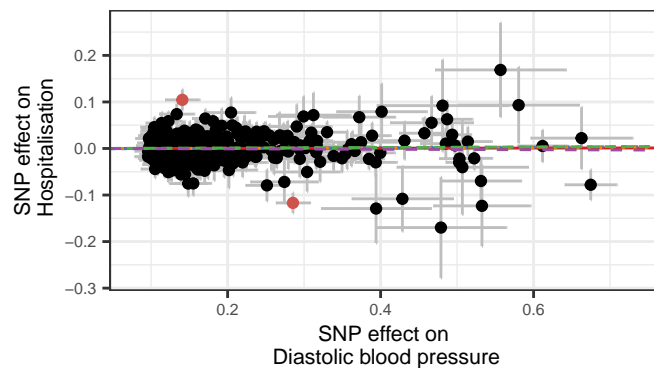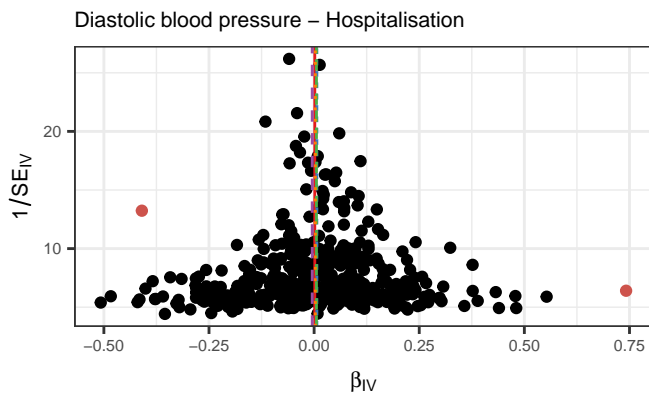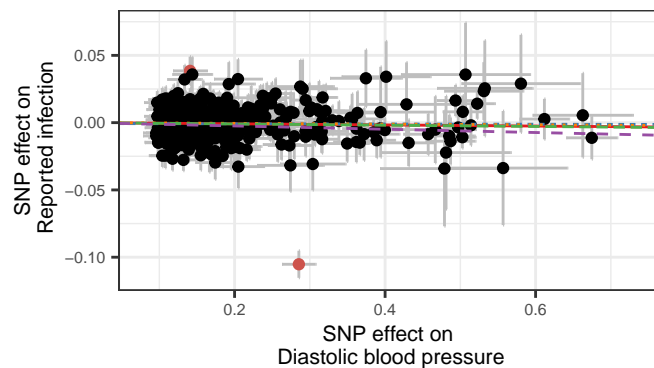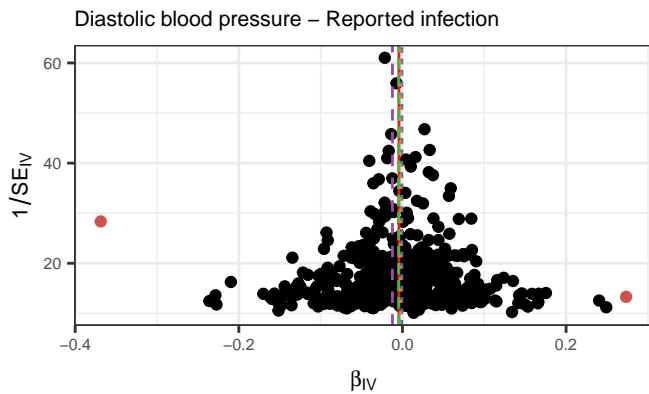

method / IVW / Egger / WME / WMBE / MRPRESSO



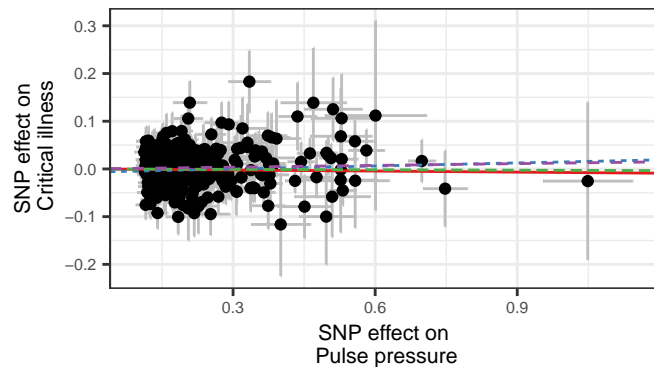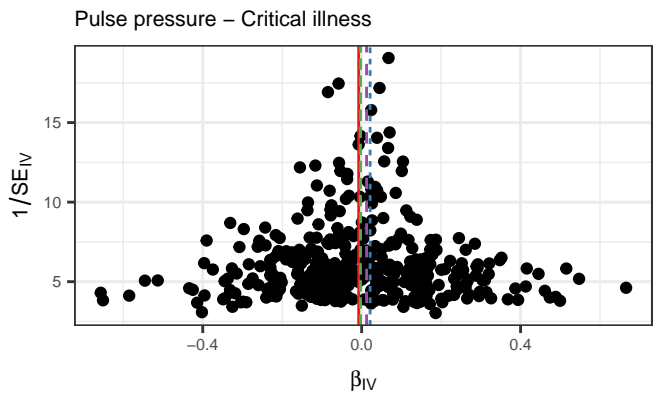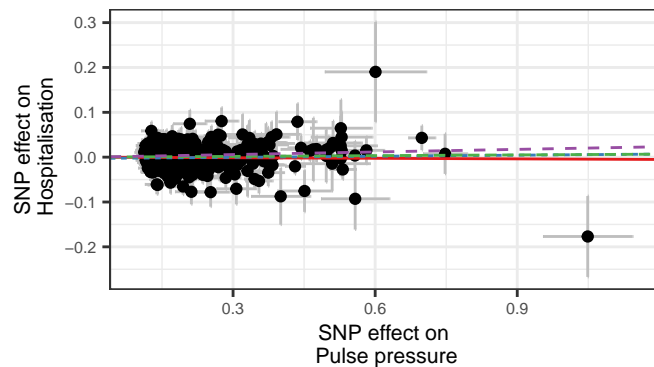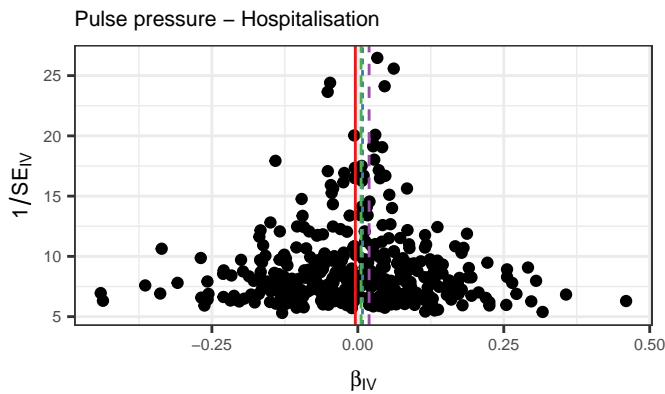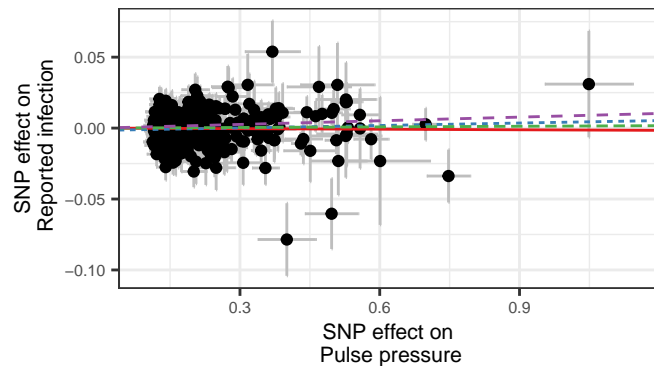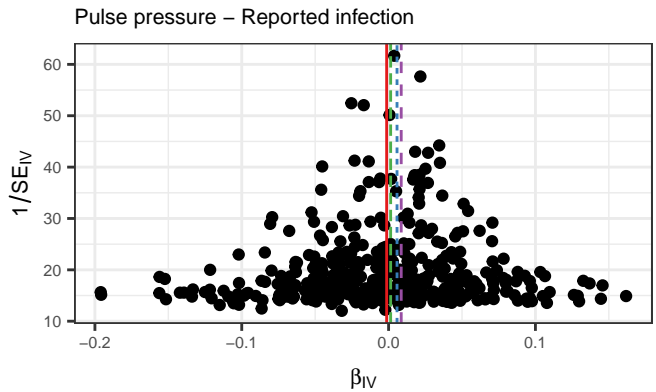

method — IWV - - - Egger - - - WME - - - WMBE - - - MRPRESSO

Systolic blood pressure – Critical illness

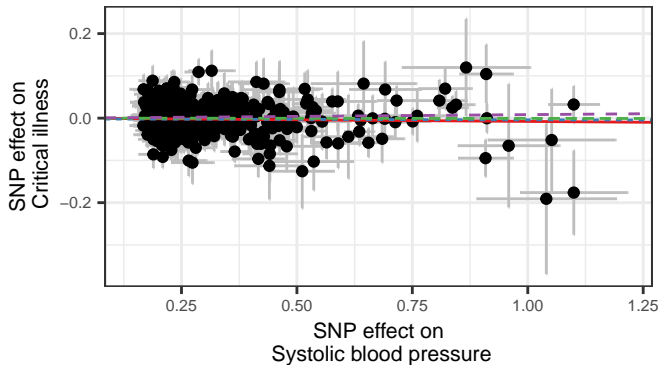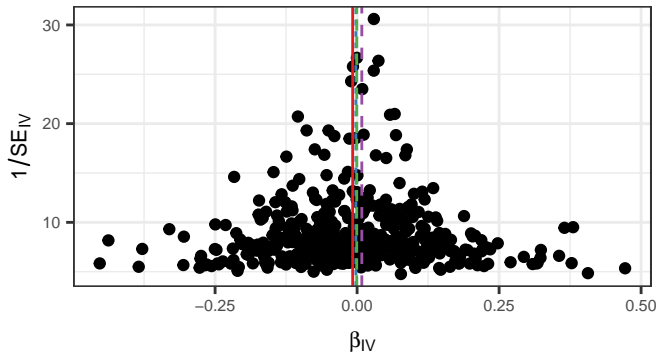

Systolic blood pressure – Hospitalisation

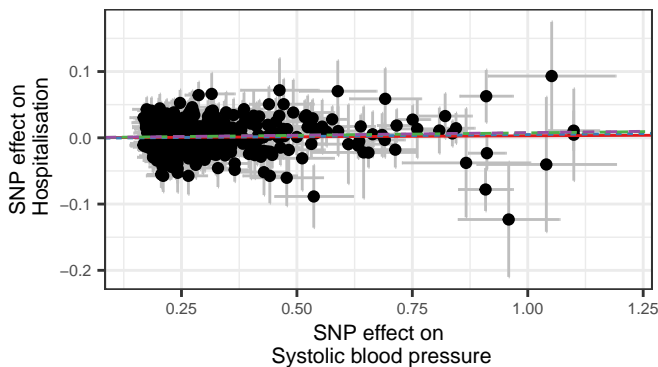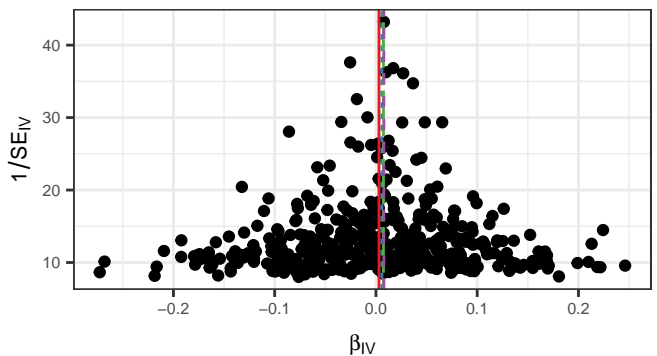

Systolic blood pressure – Reported infection

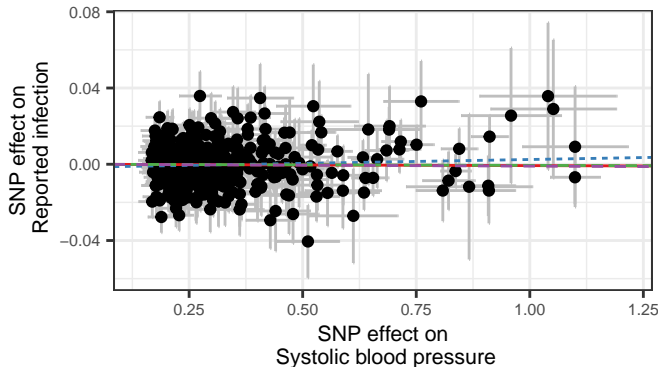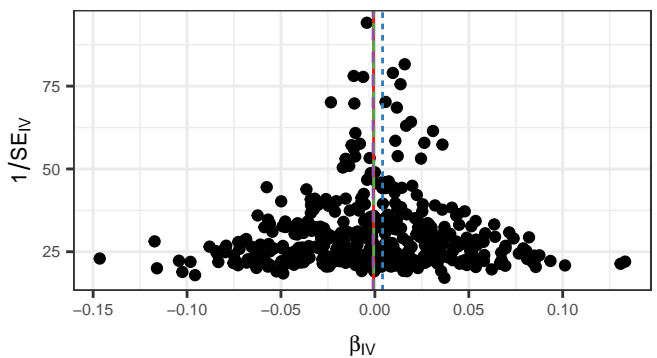

method / IVW - - - Egger - - - WME - - - WMBE . . . MRPRESSO

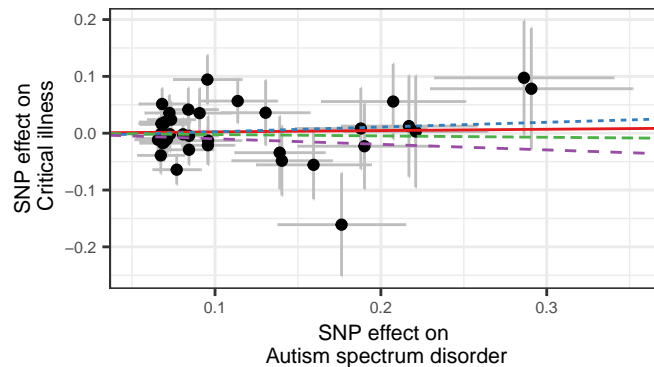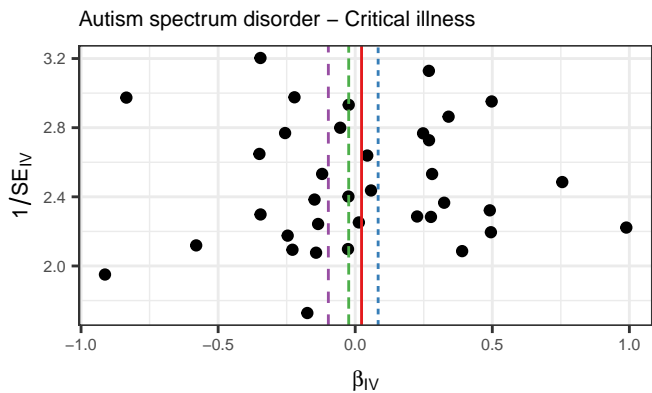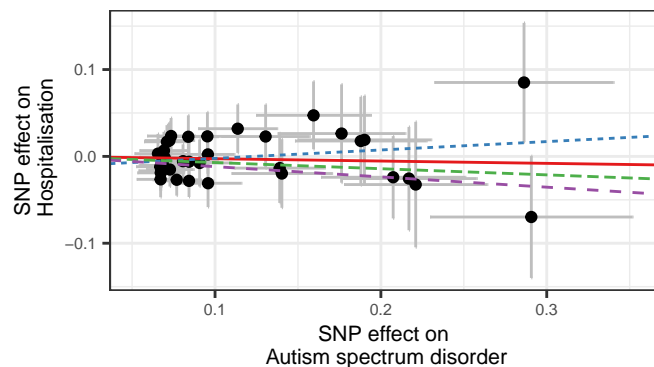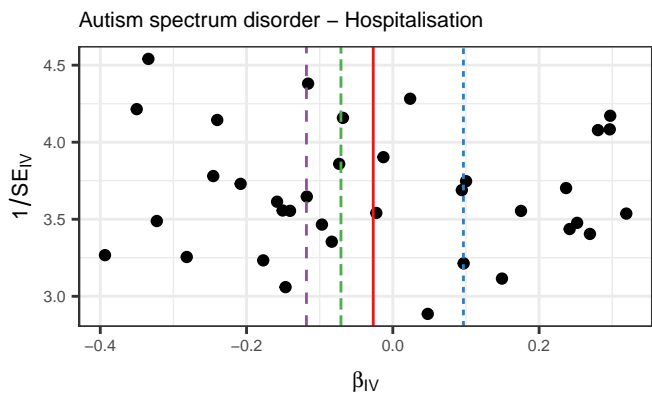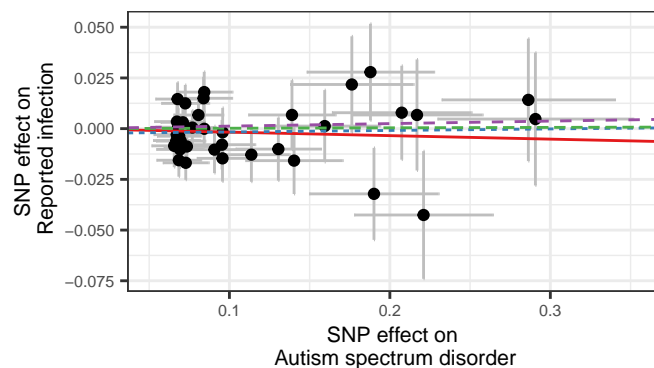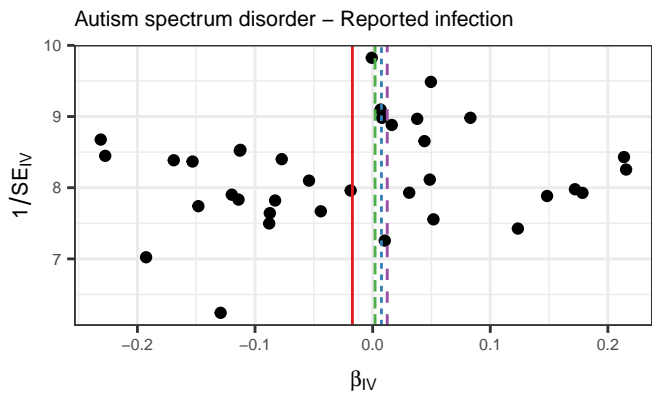

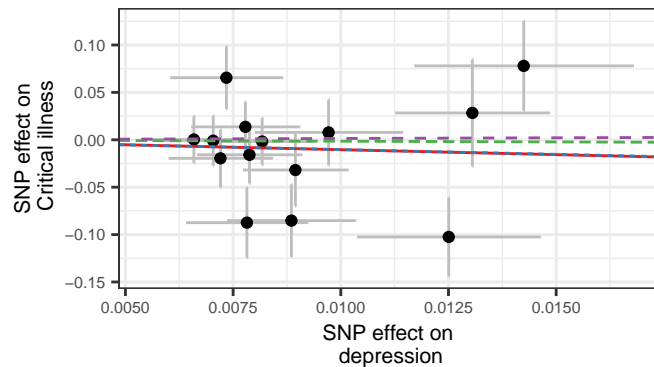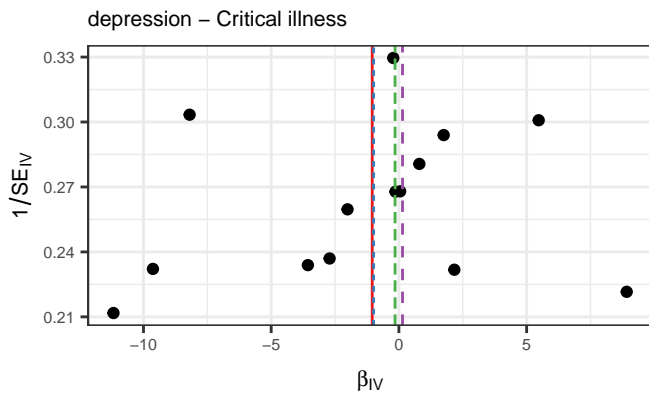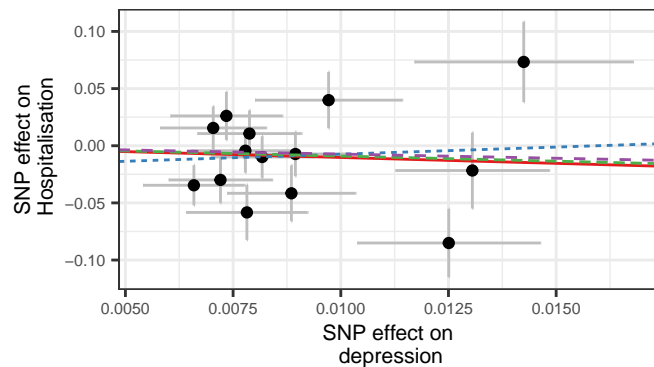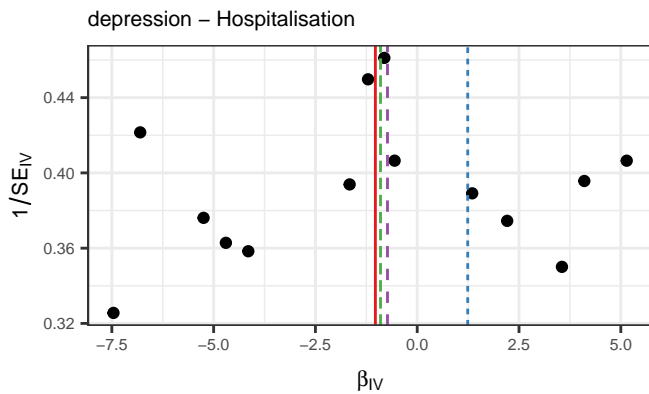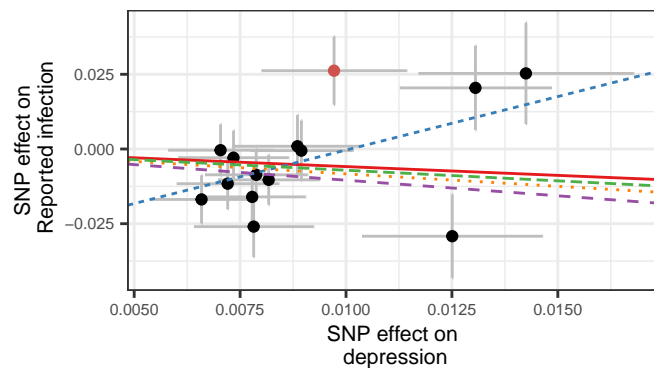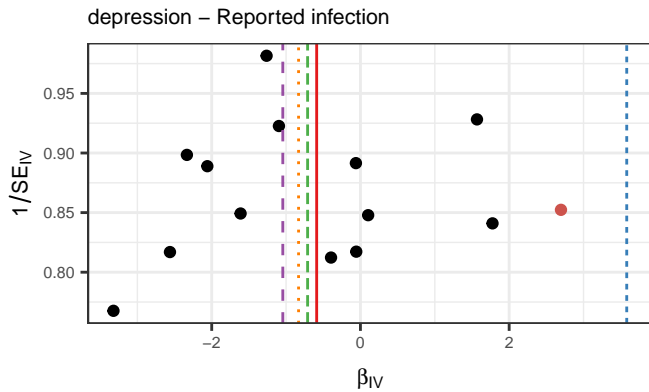

method — IWW - - - Egger - - - WME - - - WMBE - - - MRPRESSO

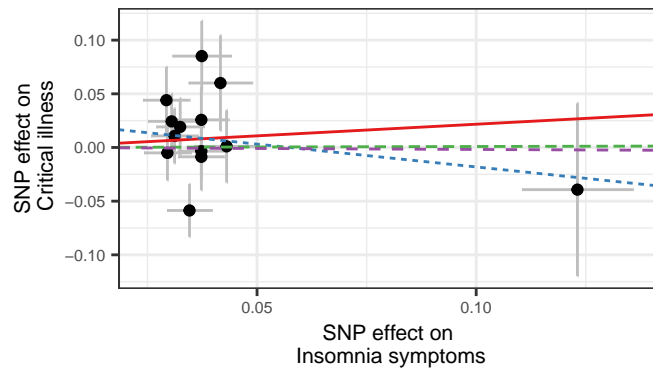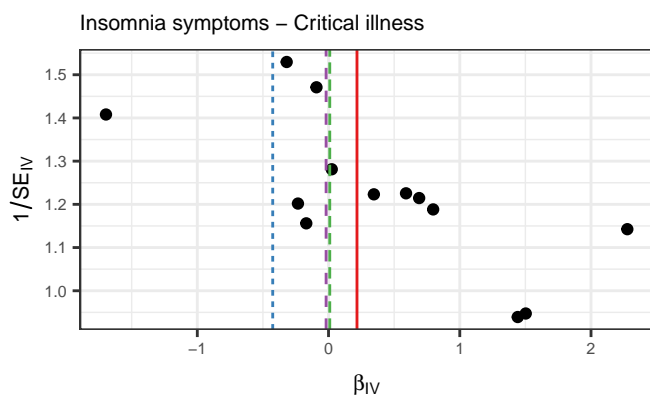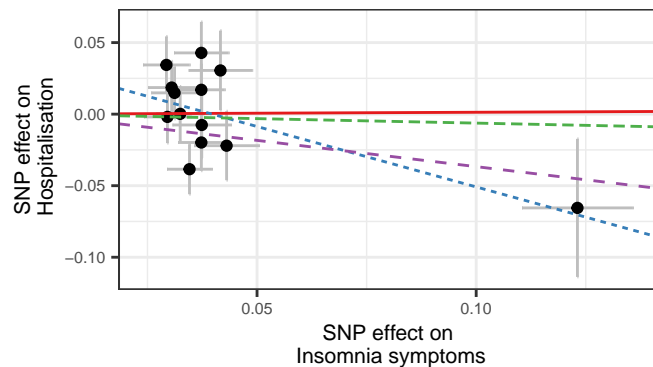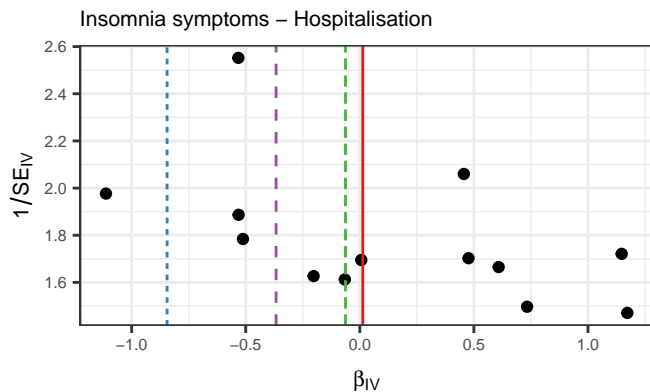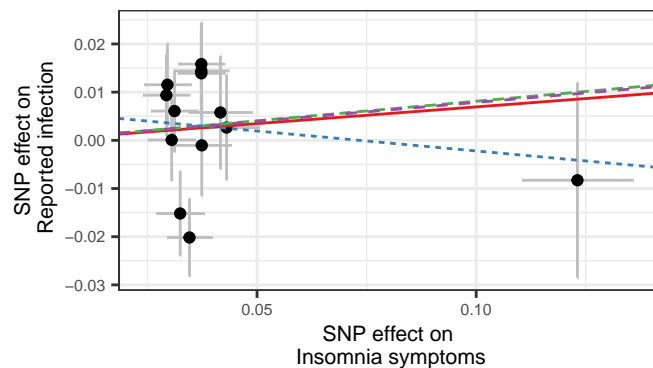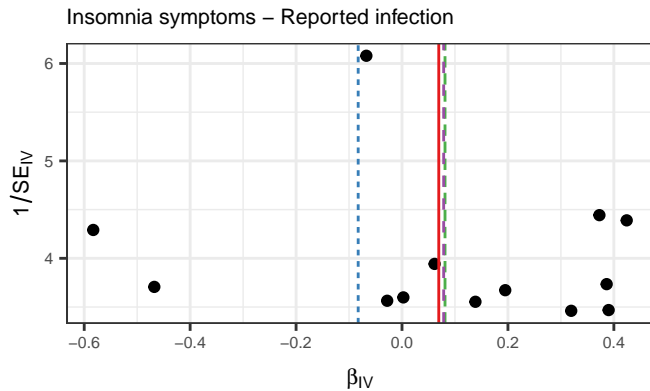

method — IVW - - - Egger - - - WME - - - WMBE - - - MRPRESSO

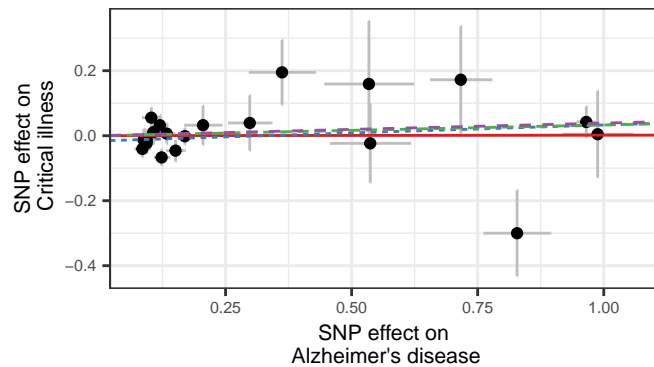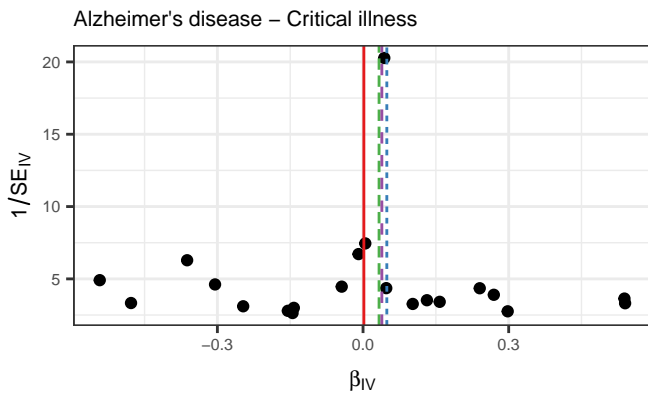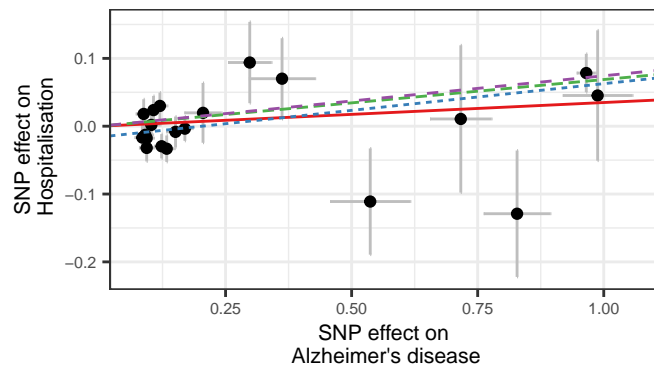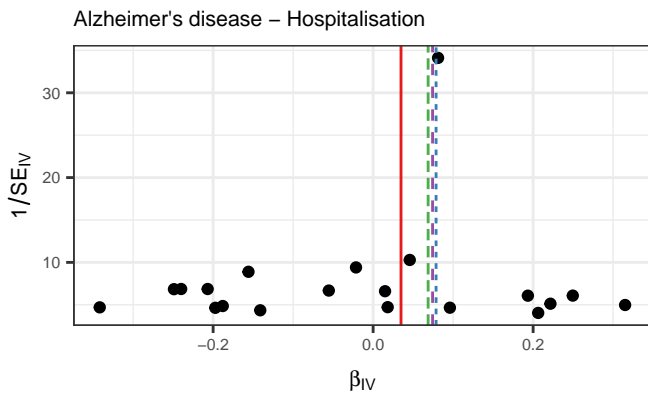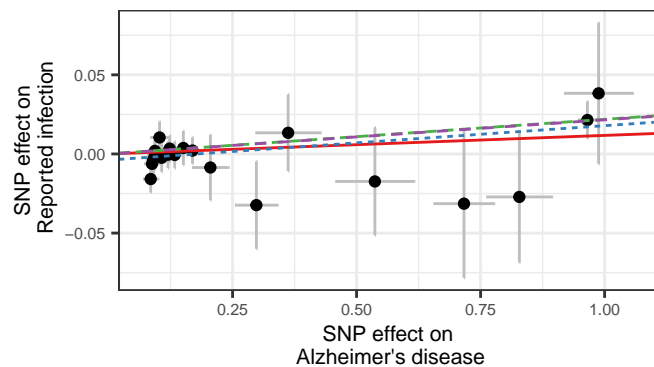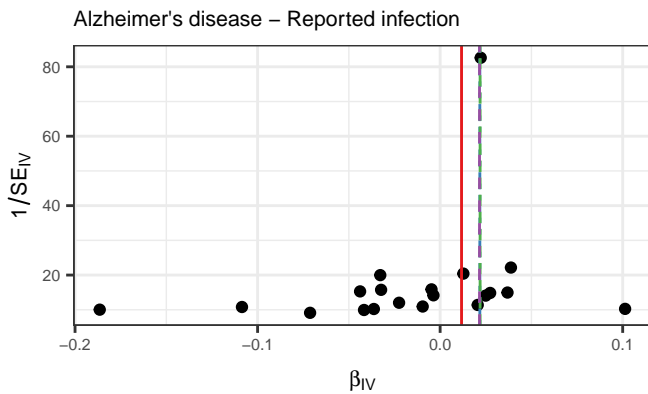

method — IVW - - - Egger - - - WME - - - WMBE - - - MRPRESSO

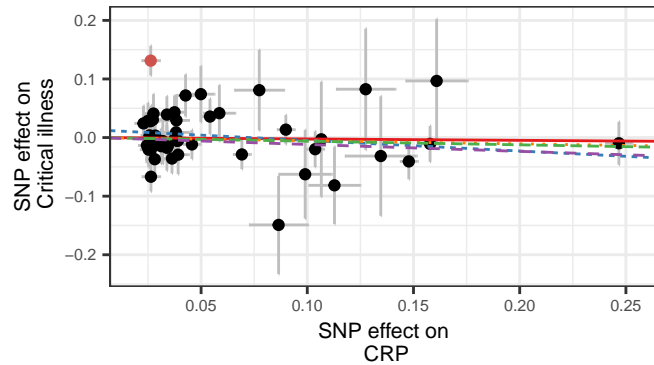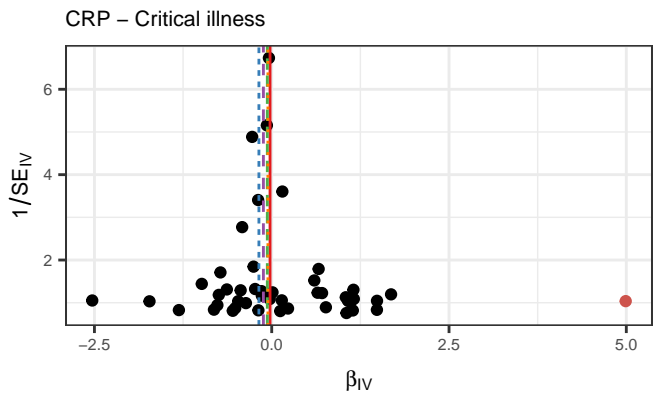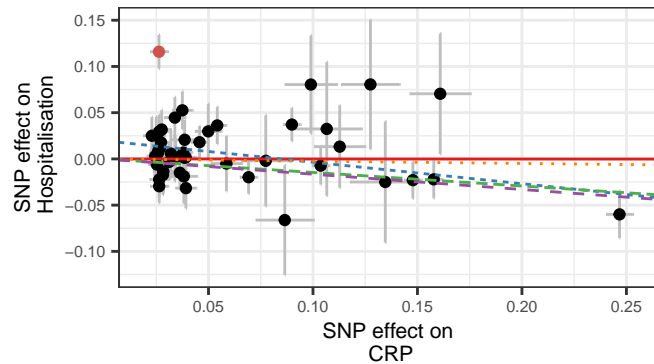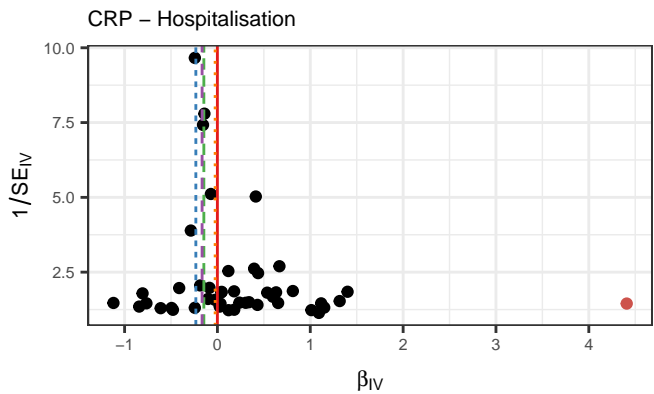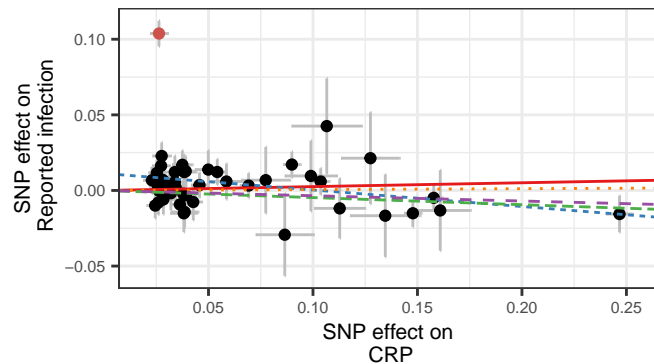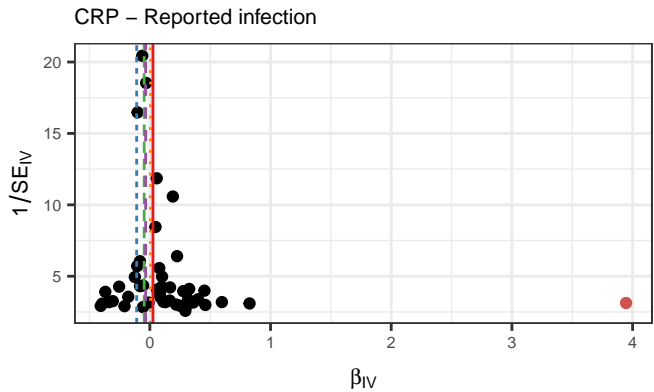

method    — IVW    - - - Egger    - - - WME    - - - WMBE    - - - MRPRESSO

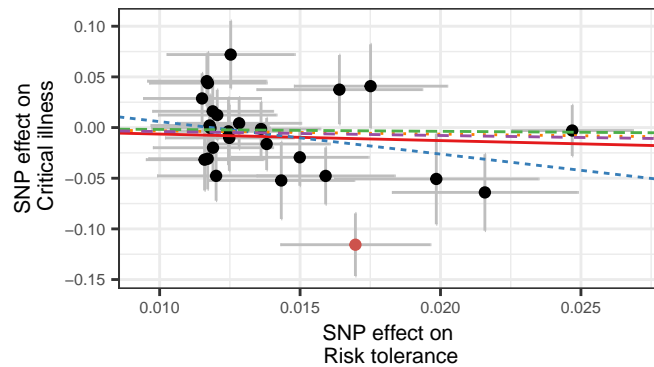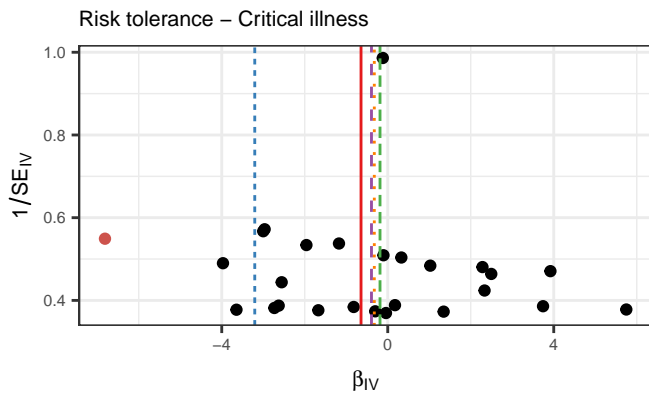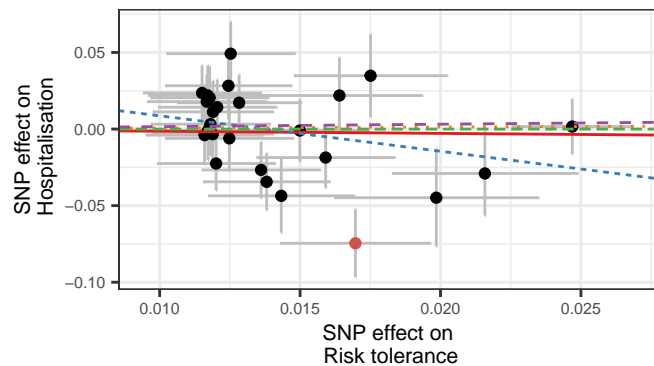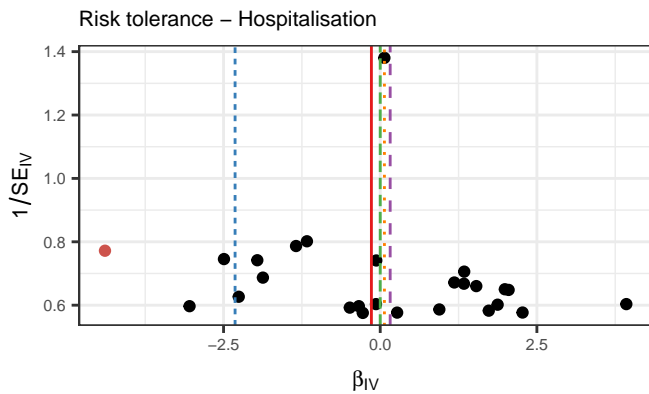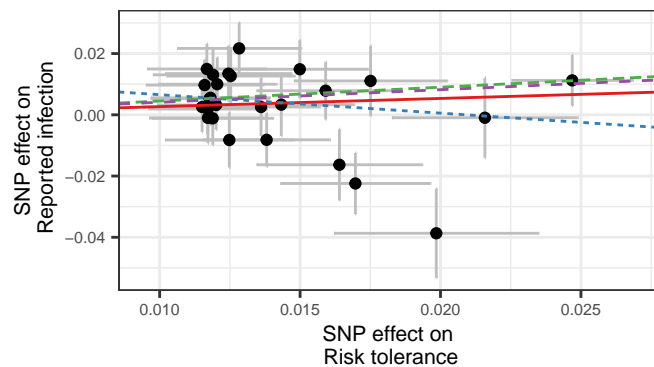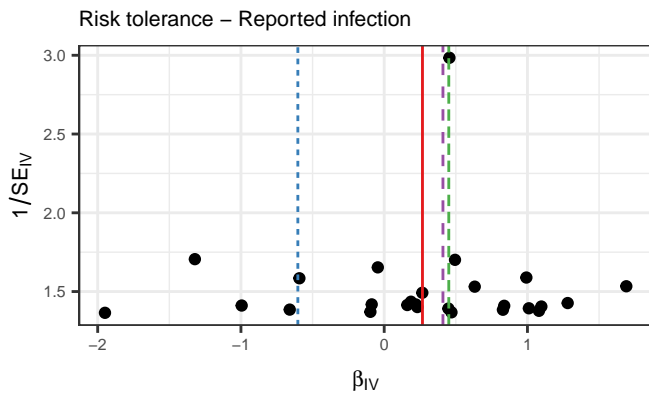

method — IVW - - - Egger - - - WME - - - WMBE - - - MRPRESSO



Cigarettes per day – Critical illness

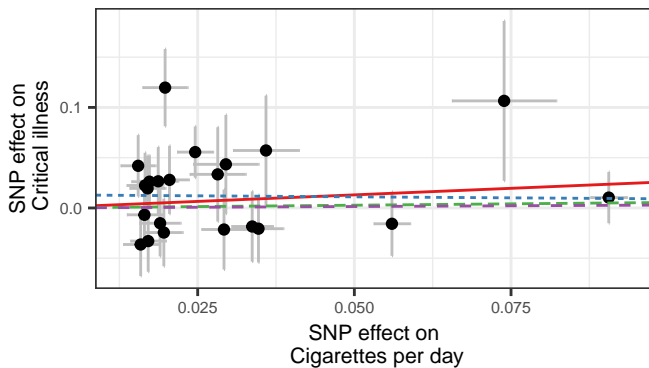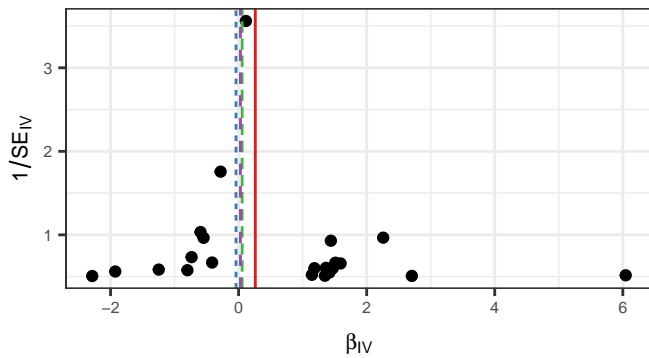

Cigarettes per day – Hospitalisation

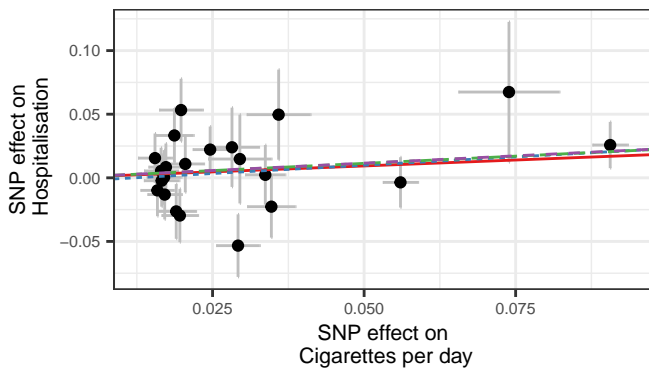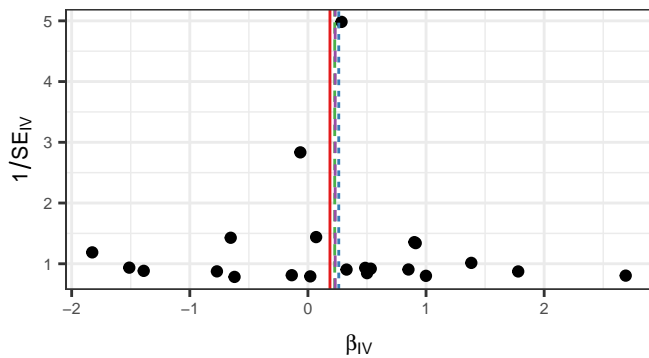

Cigarettes per day – Reported infection

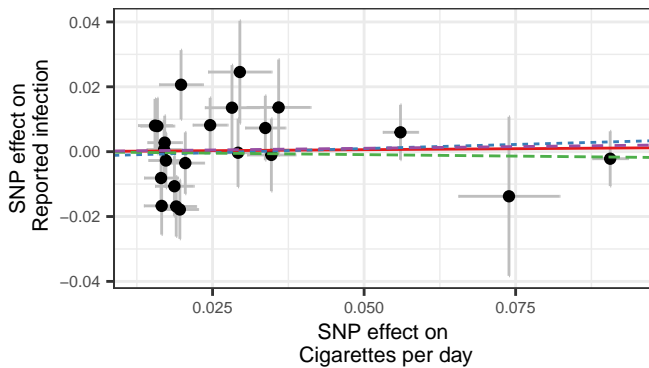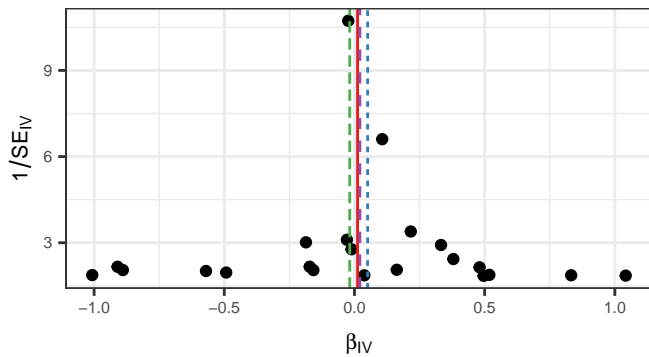

method — IVW - - - Egger - - - WME - - - WMBE - - - MRPRESSO

Smoking initiation – Critical illness

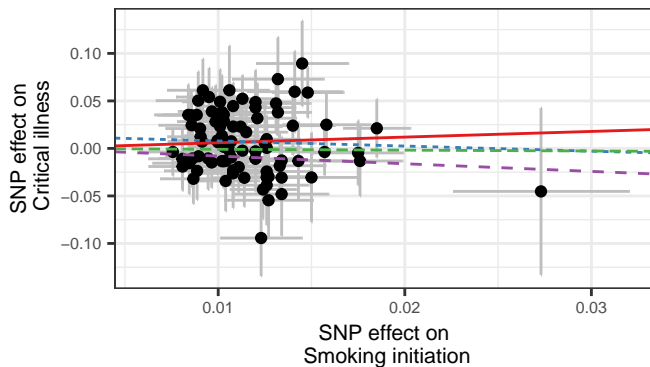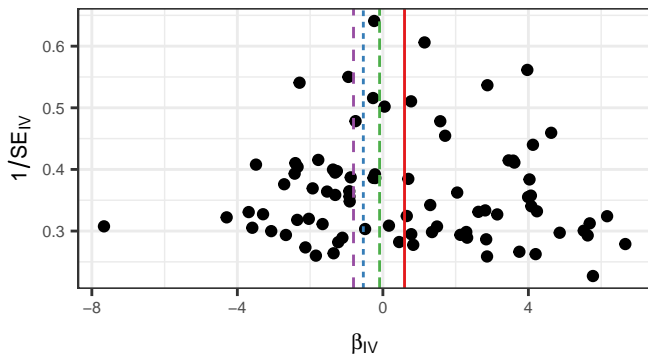

Smoking initiation – Hospitalisation

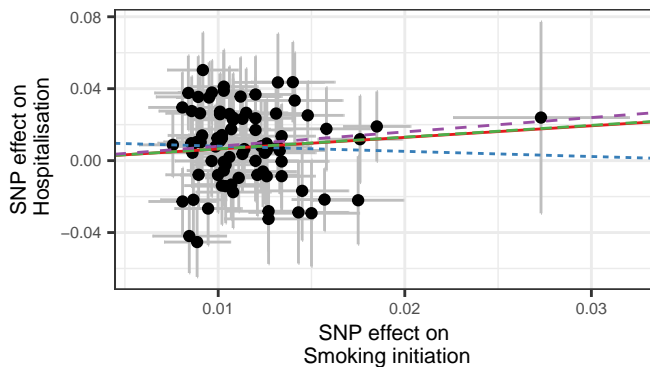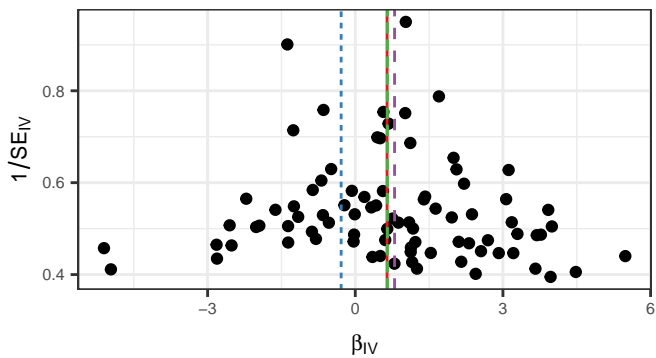

Smoking initiation – Reported infection

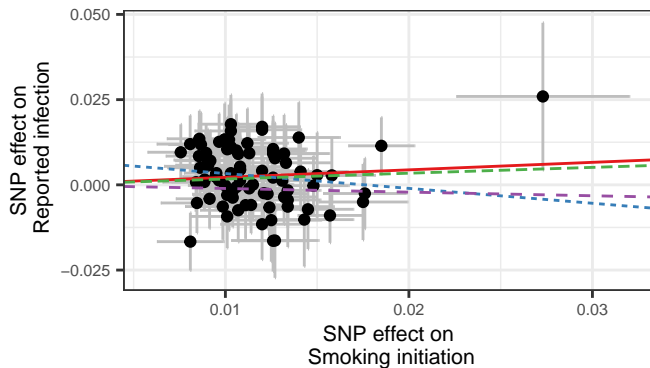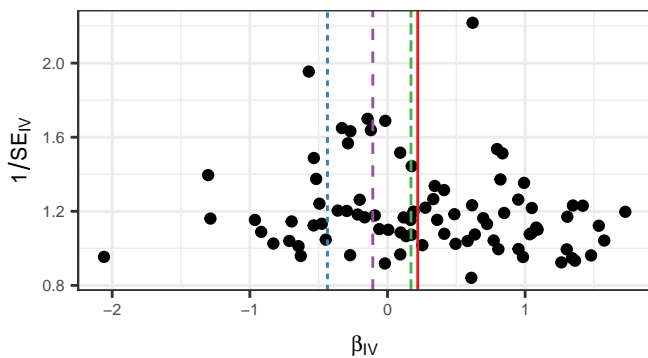

method — IVW - - - Egger - - - WME - - - WMBE - - - MRPRESSO

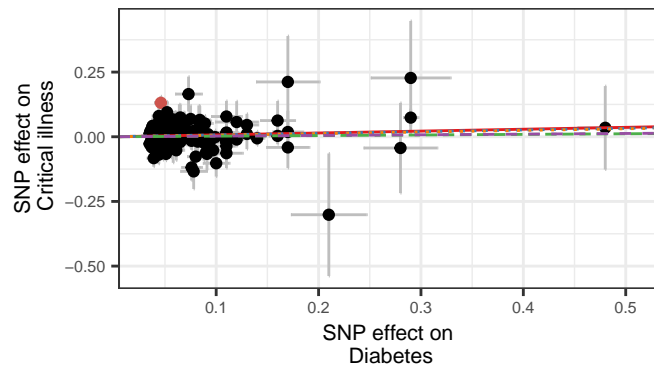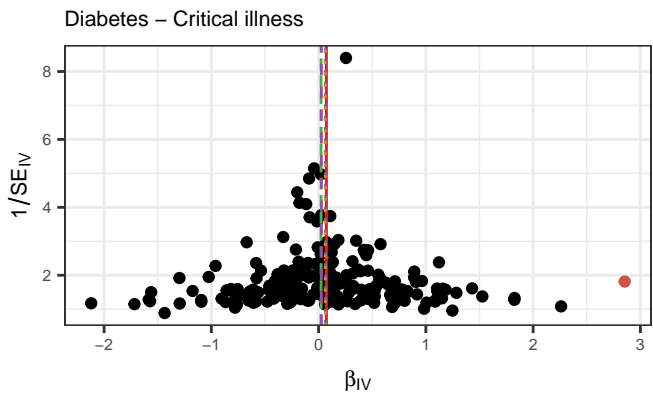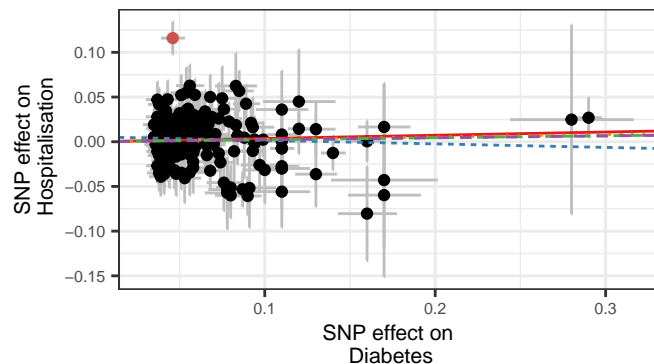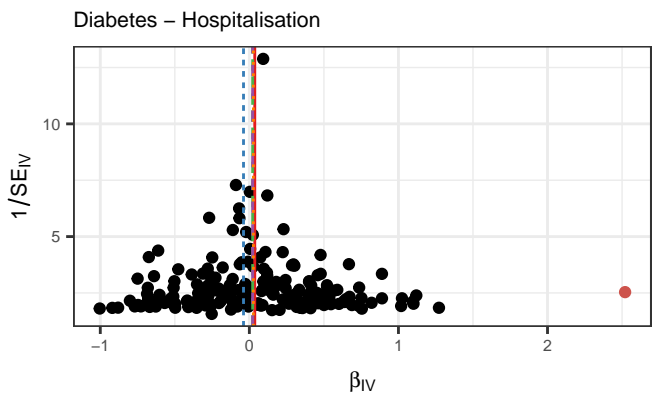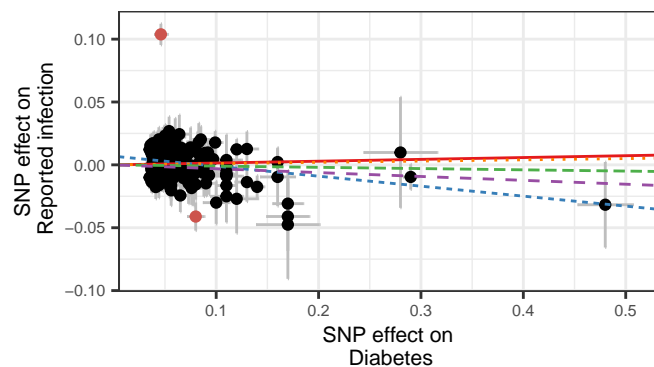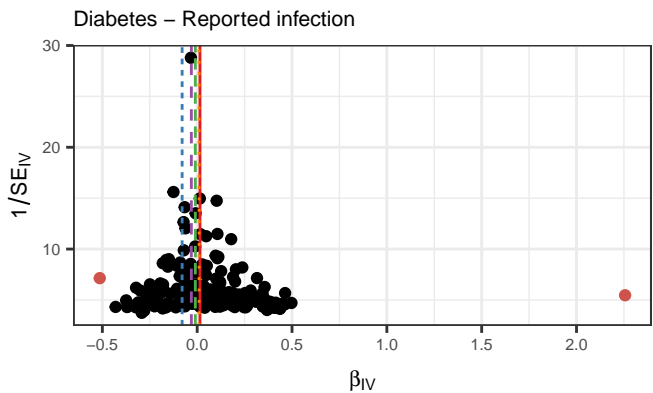

method    — IVW    - - - Egger    - - - WME    - - - WMBE    . . . MRPRESSO

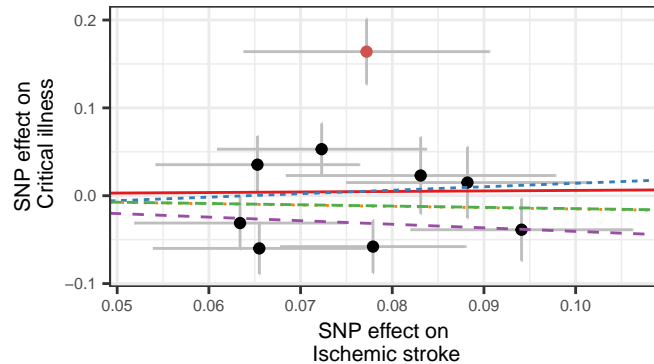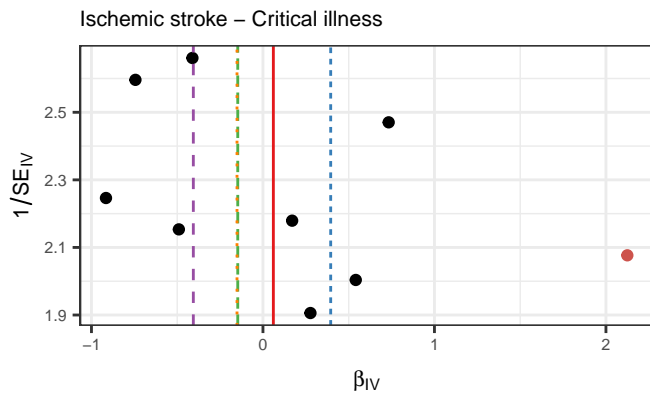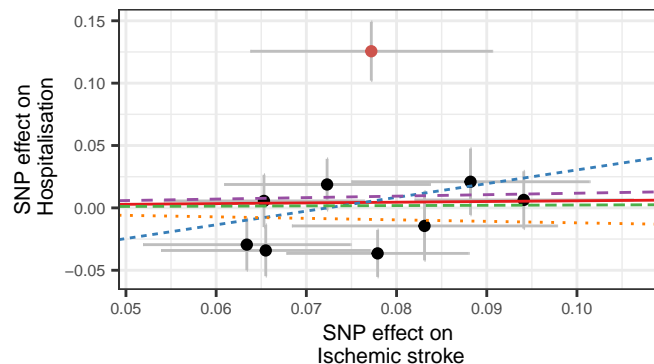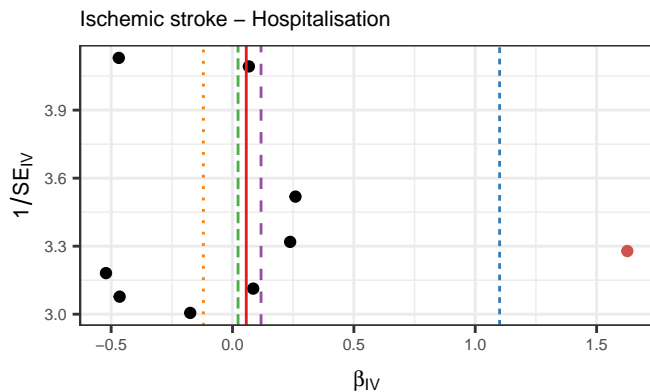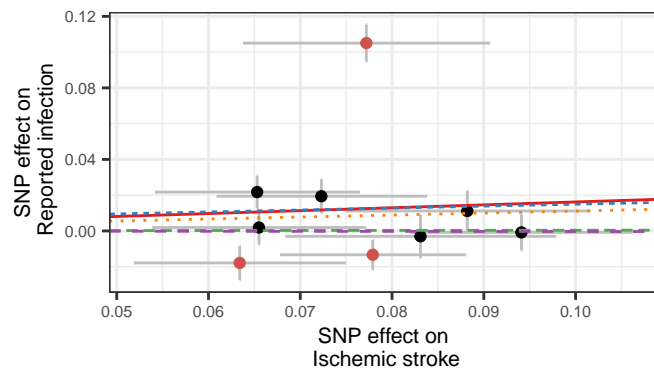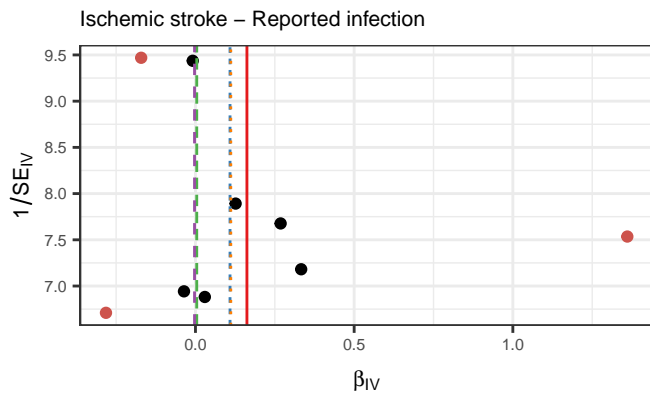

method / IVW - - - Egger - - - WME - - - WMBE - - - MRPRESSO

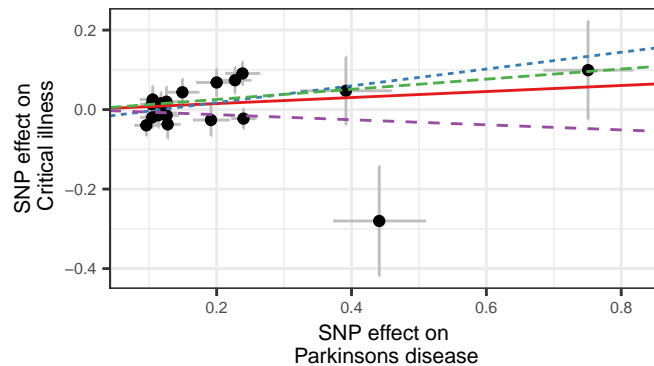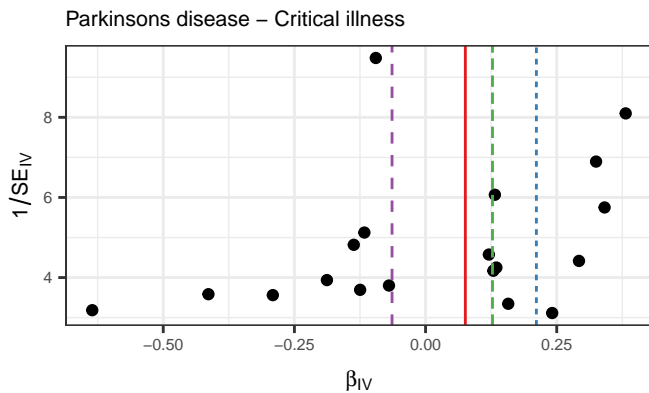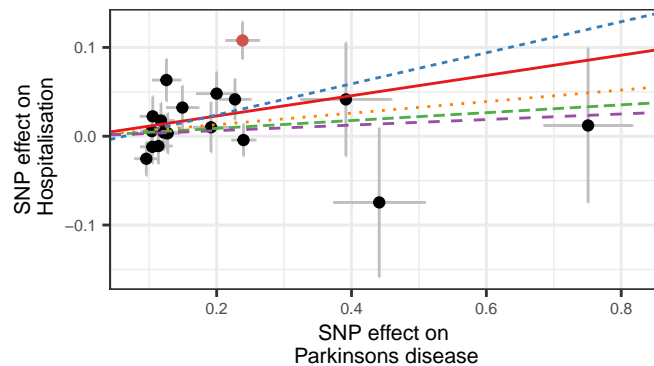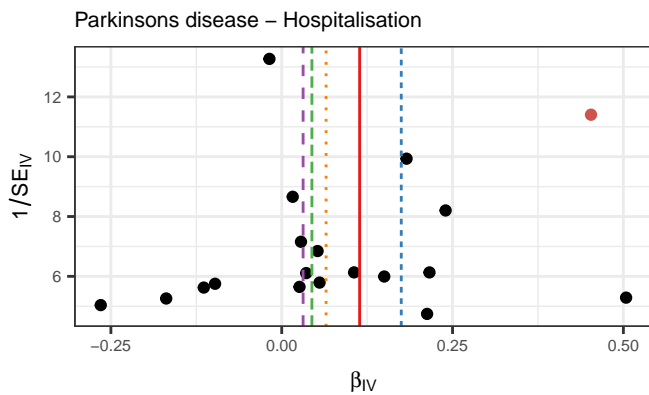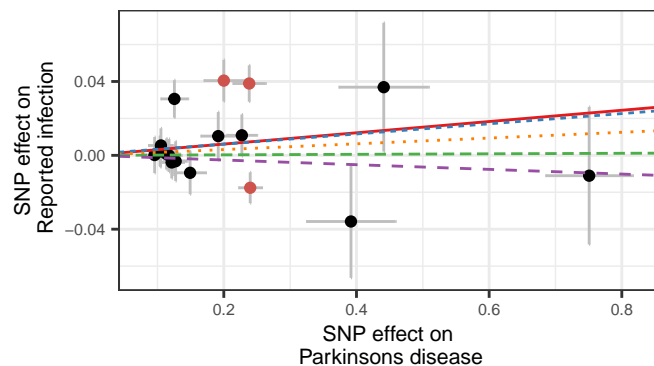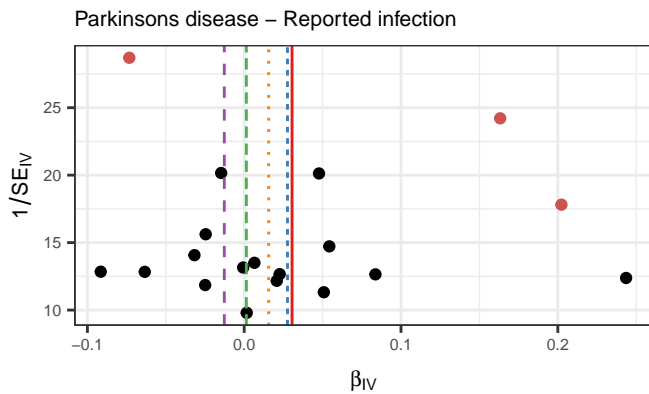

method — IVW - - - Egger - - - WME - - - WMBE - - - MRPRESSO

Amyotrophic lateral sclerosis – Critical illness

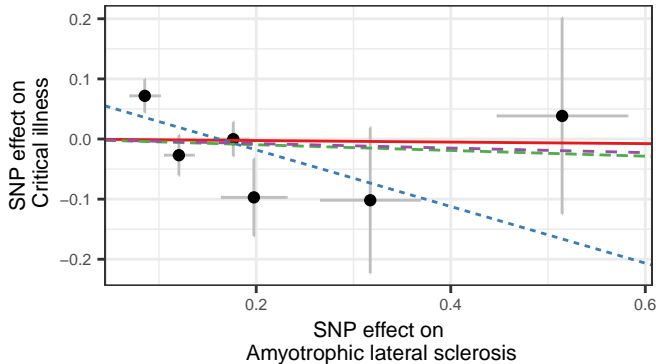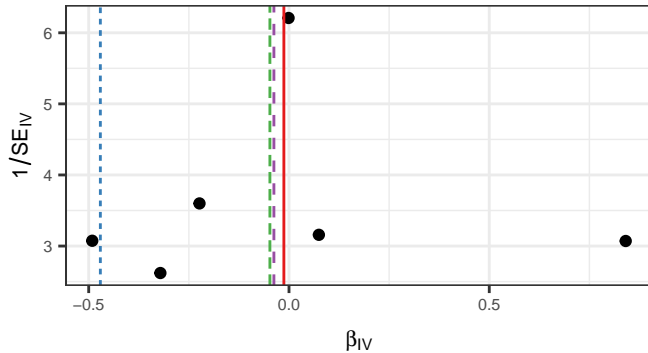

Amyotrophic lateral sclerosis – Hospitalisation

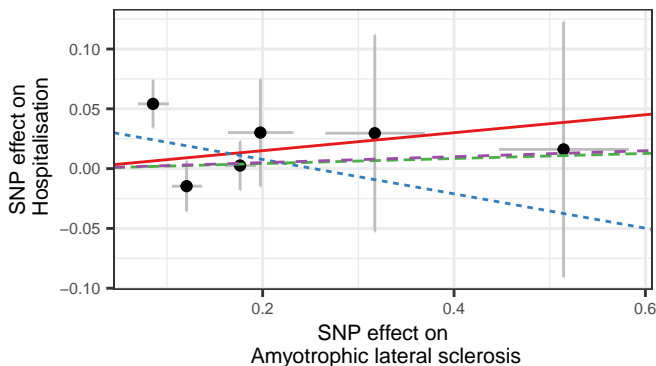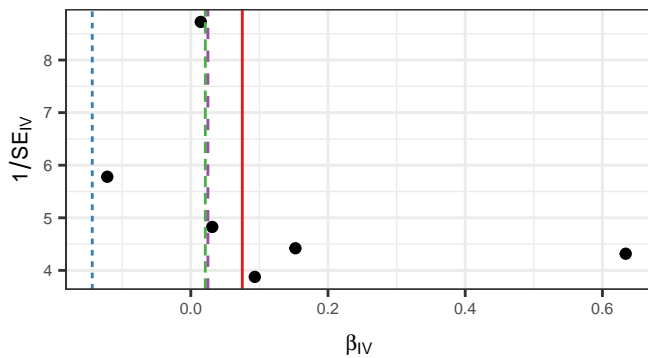

Amyotrophic lateral sclerosis – Reported infection

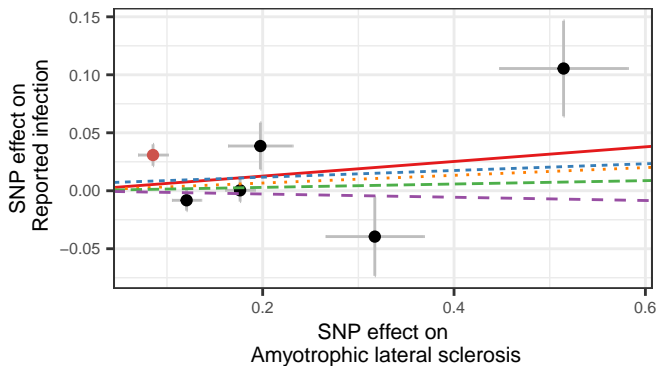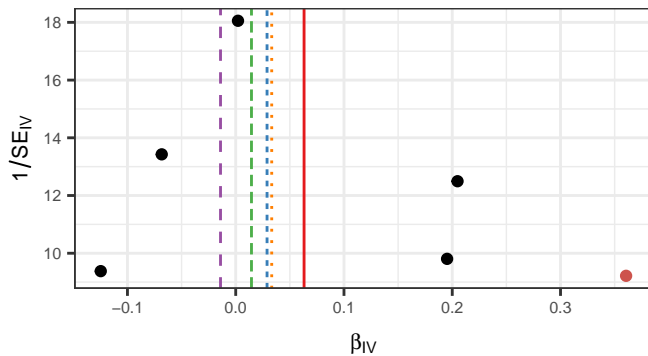

method — IWW - - - Egger - - - WME - - - WMBE - - - MRPRESSO

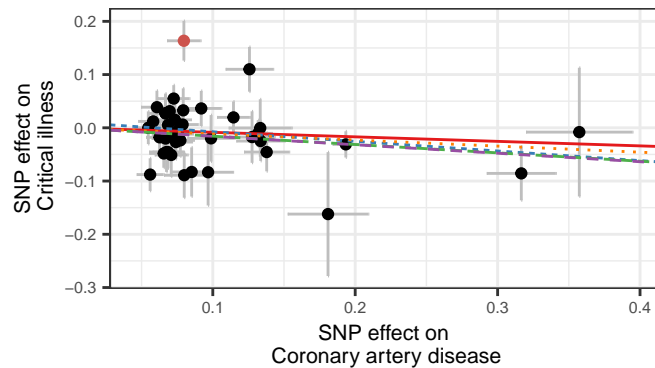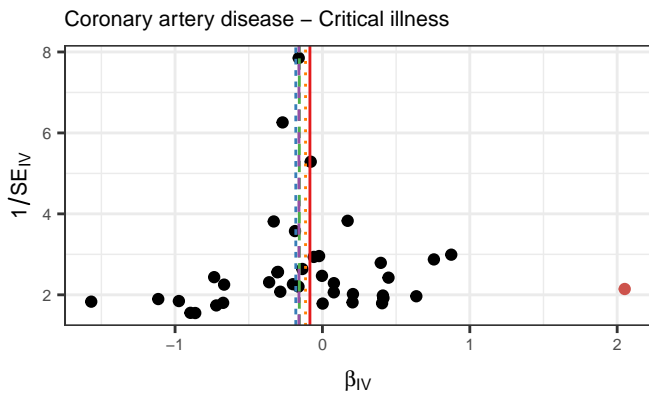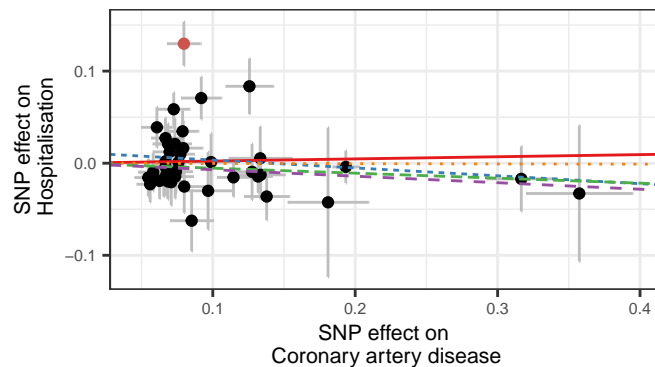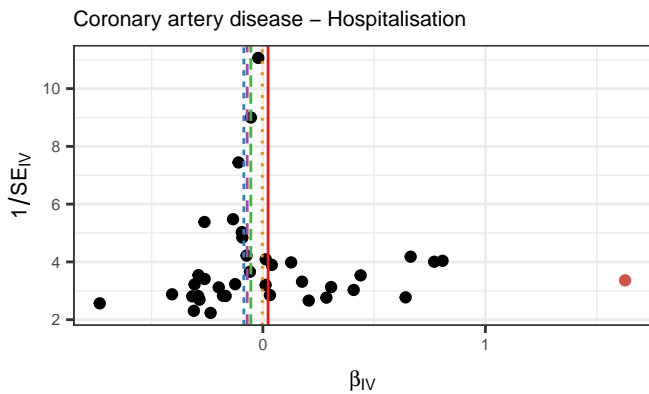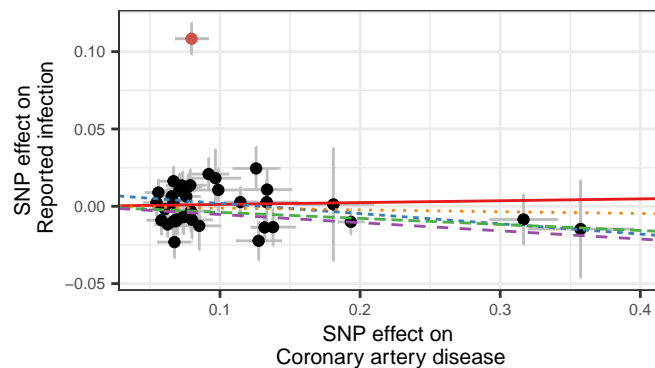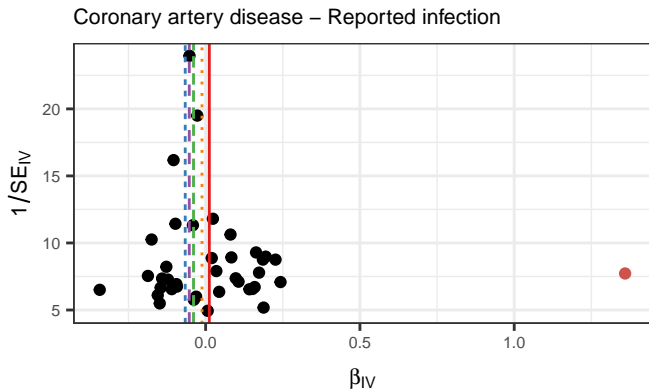

method / IVW - - - Egger - - - WME - - - WMBE - - - MRPRESSO

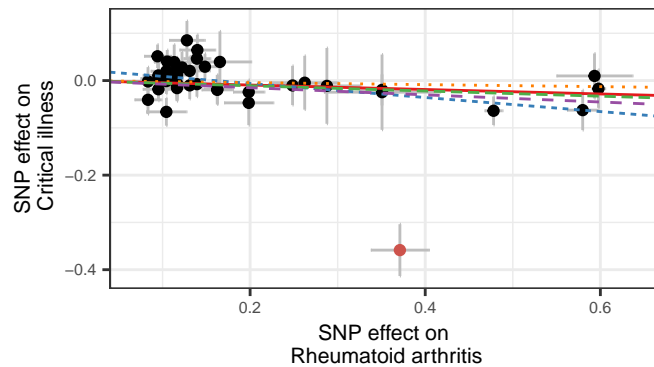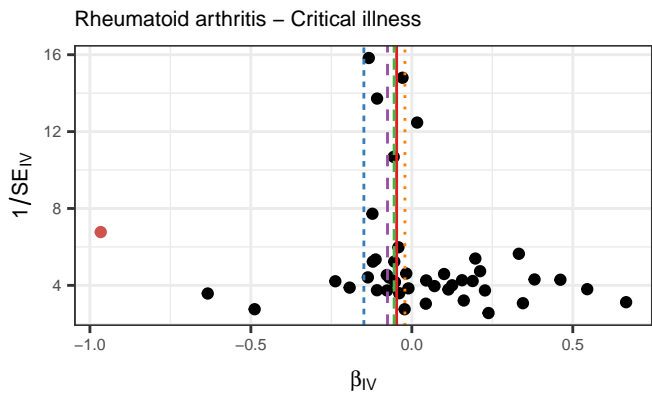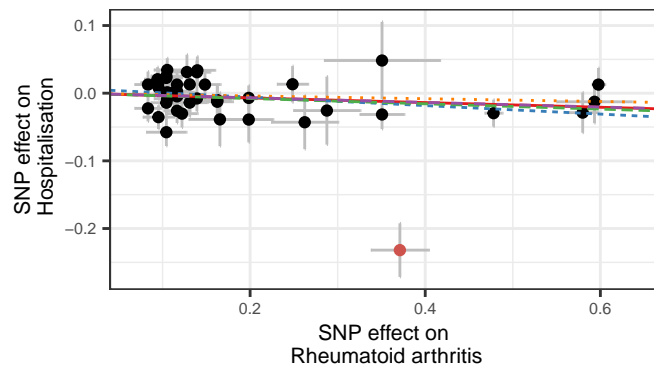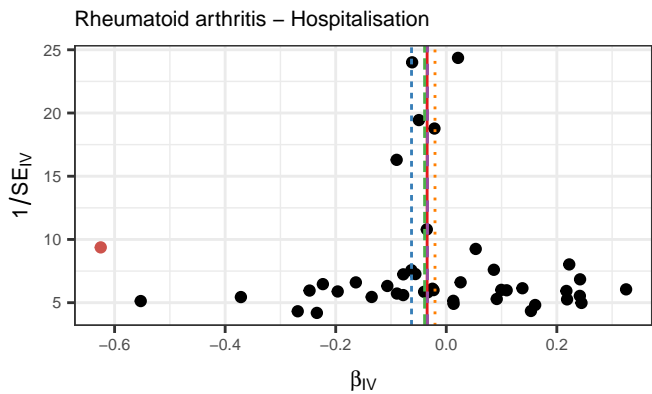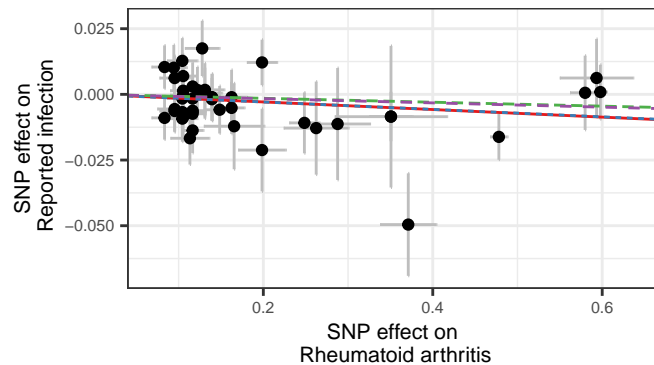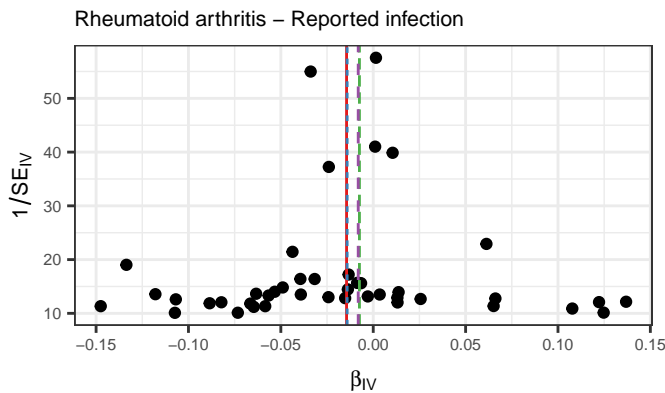

method / IWW - - - Egger - - - WME - - - WMBE - - - MRPRESSO



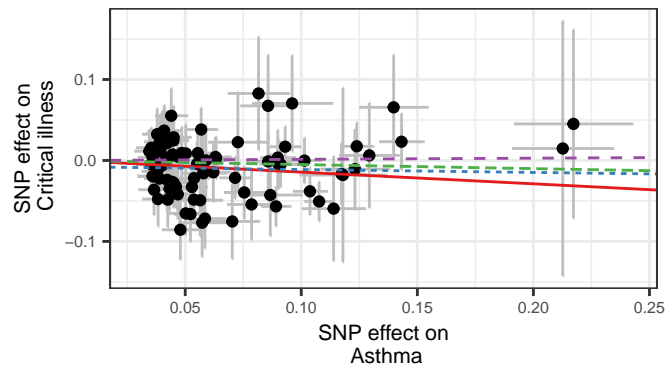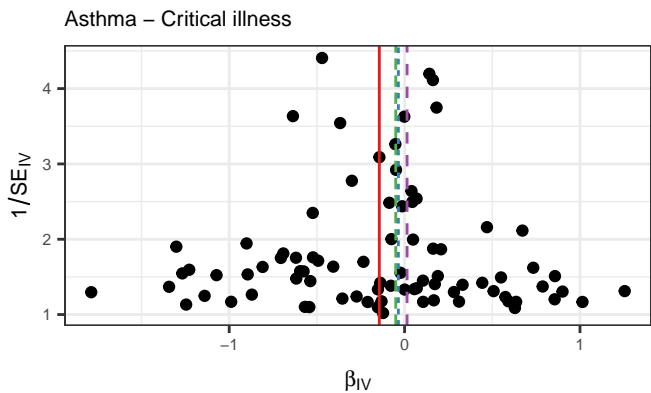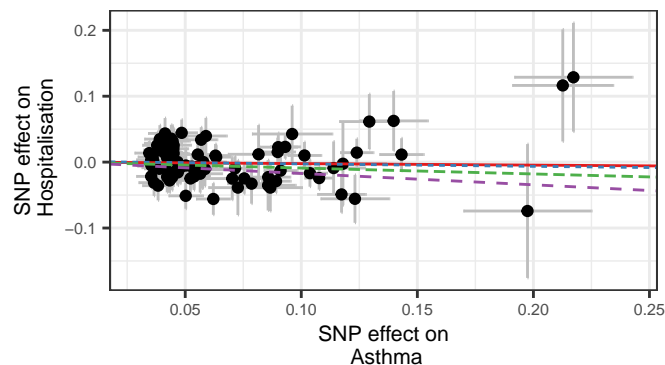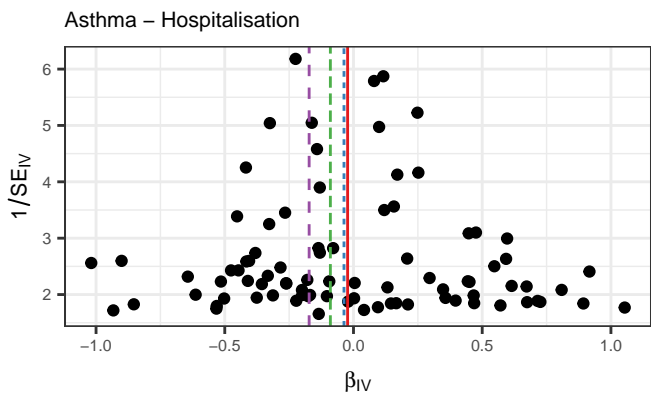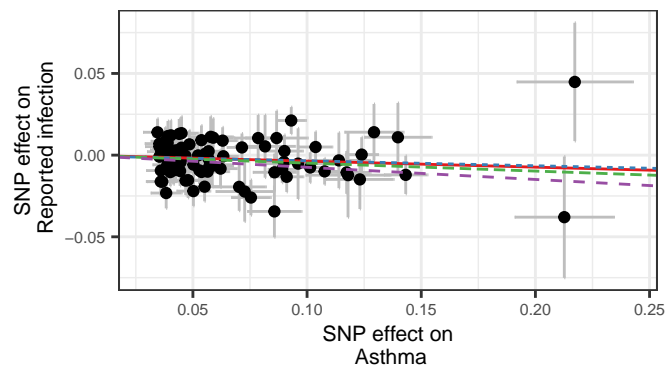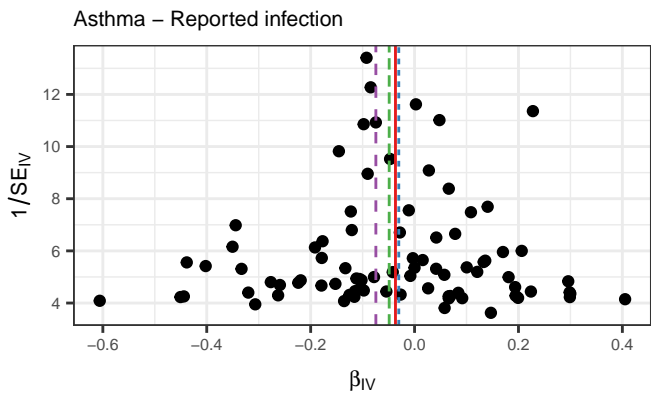

method — IVW - - - Egger - - - WME - - - WMBE - - - MRPRESSO

Multiple sclerosis – Critical illness

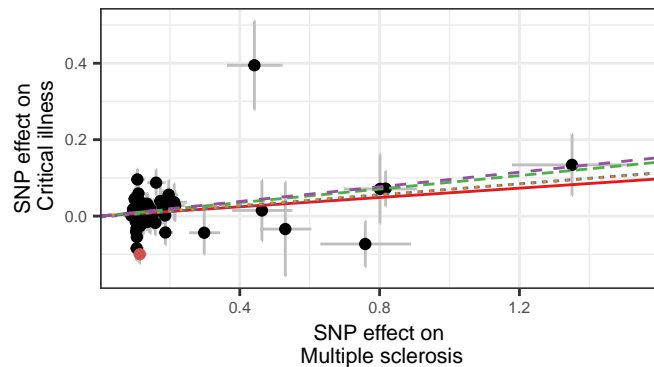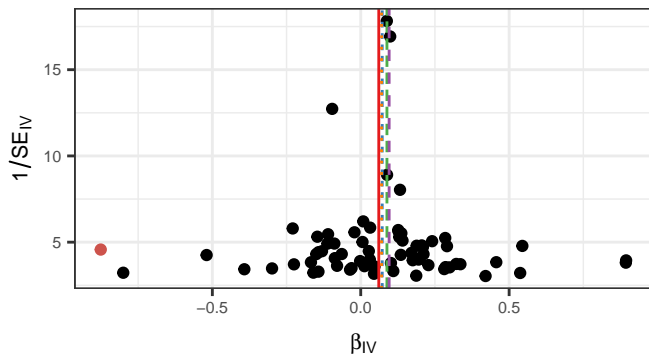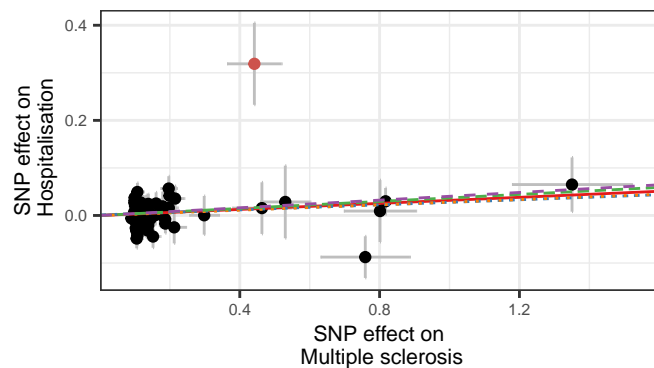

Multiple sclerosis – Hospitalisation

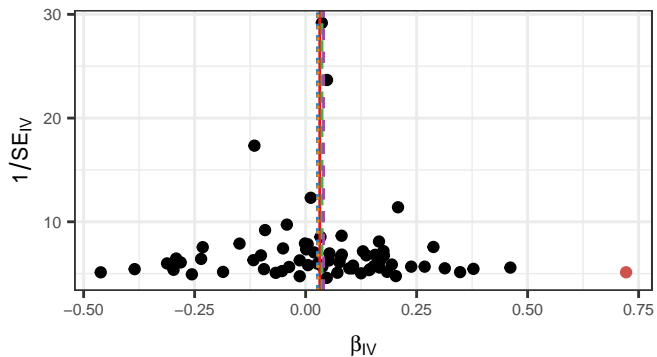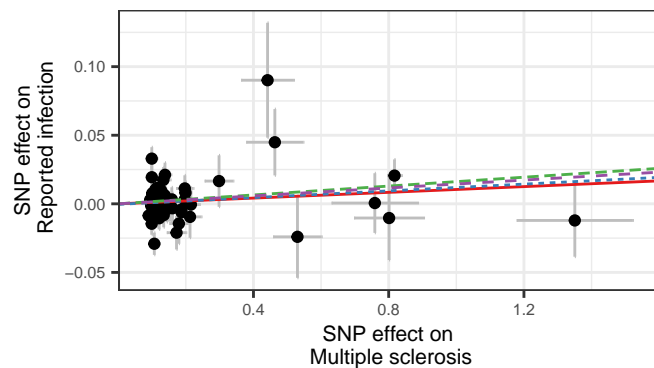

Multiple sclerosis – Reported infection

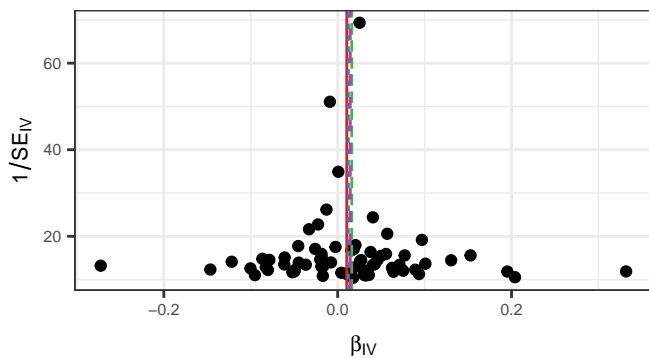

method — IWW - - - Egger - - - WME - - - WMBE - - - MRPRESSO

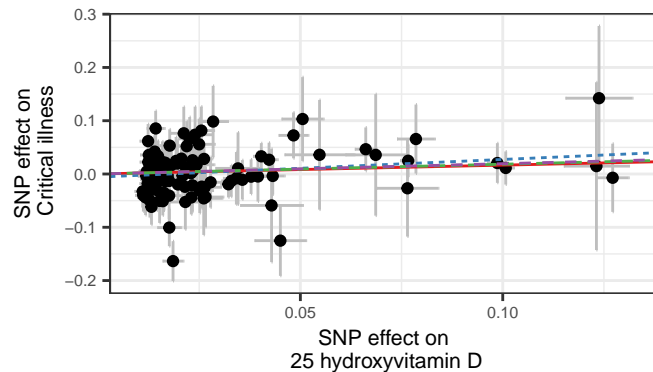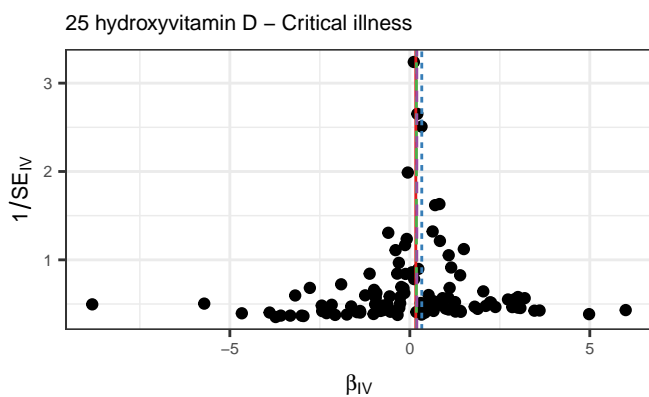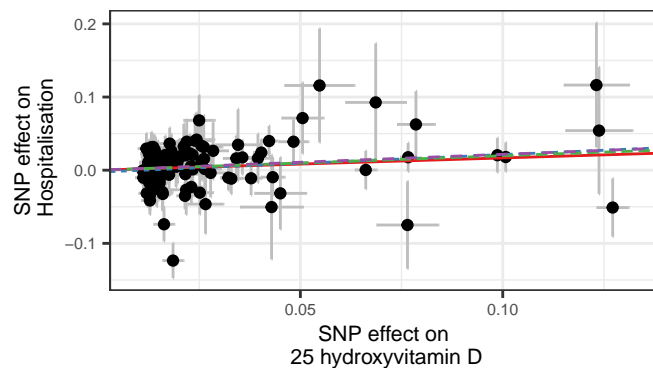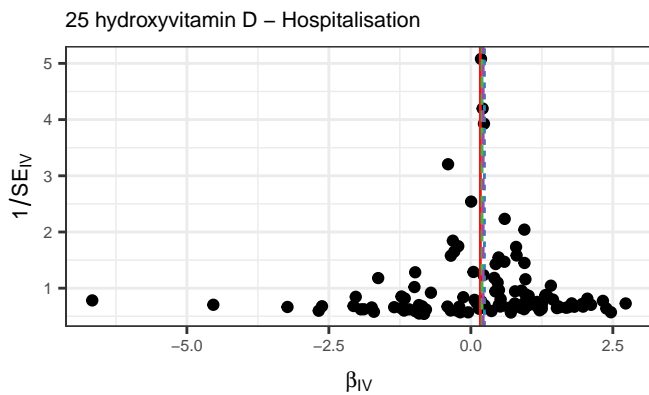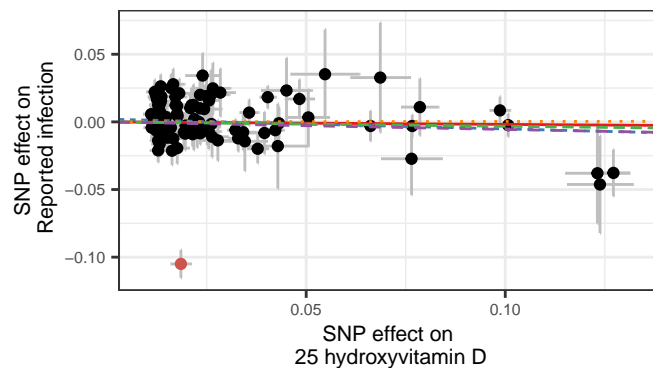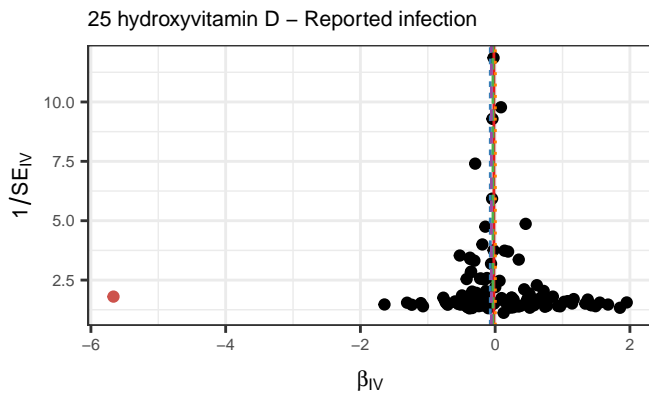

method — IWW - - - Egger - - - WME - - - WMBE - - - MRPRESSO

Schizophrenia – Critical illness

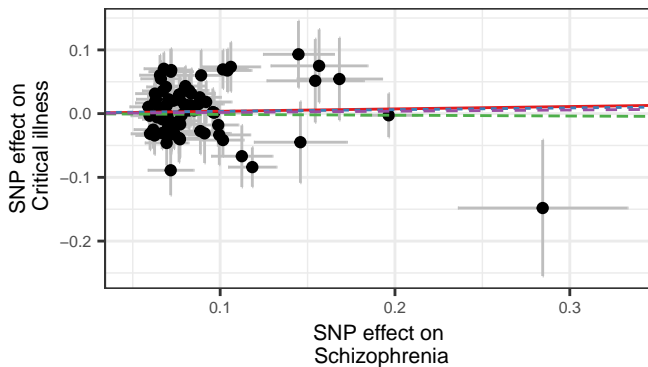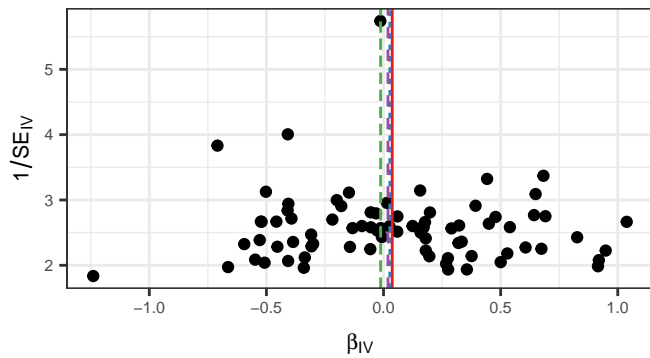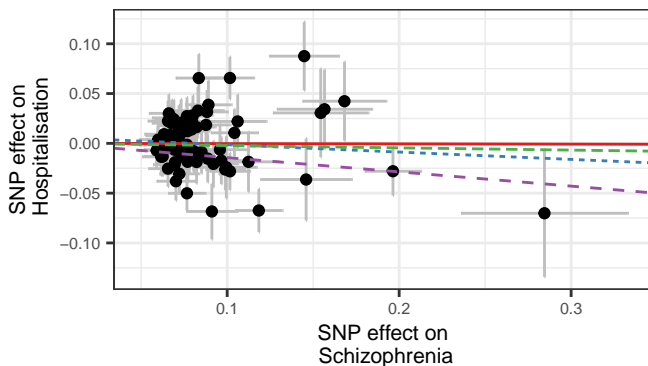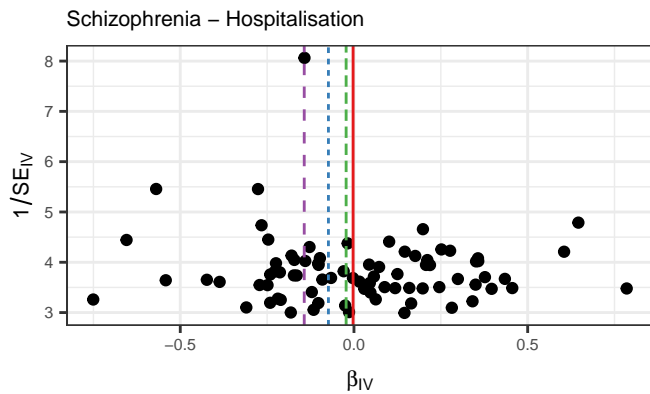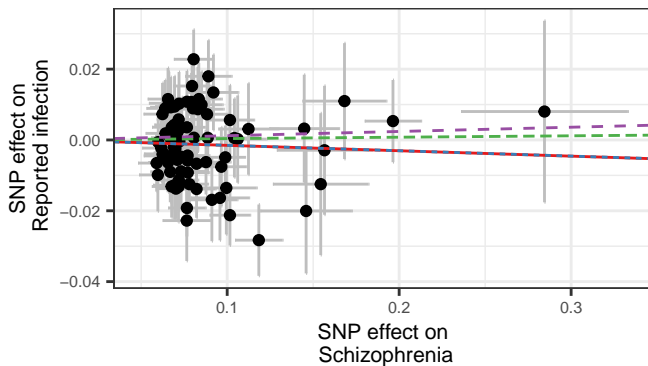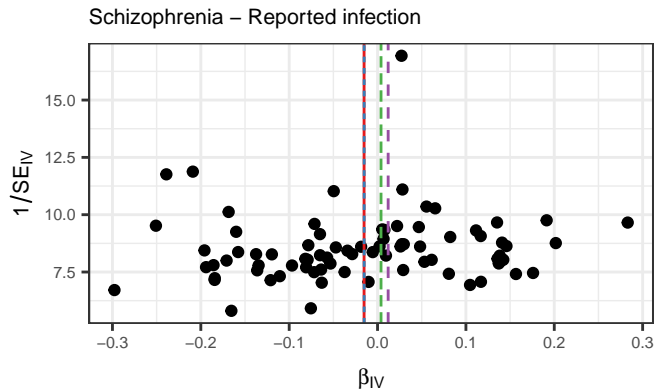

method — IVW - - - Egger - - - WME - - - WMBE - - - MRPRESSO

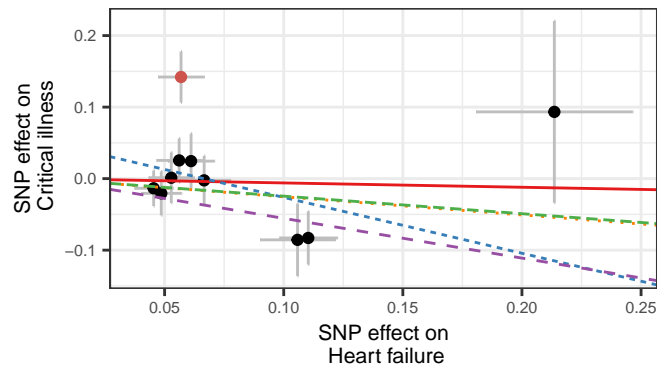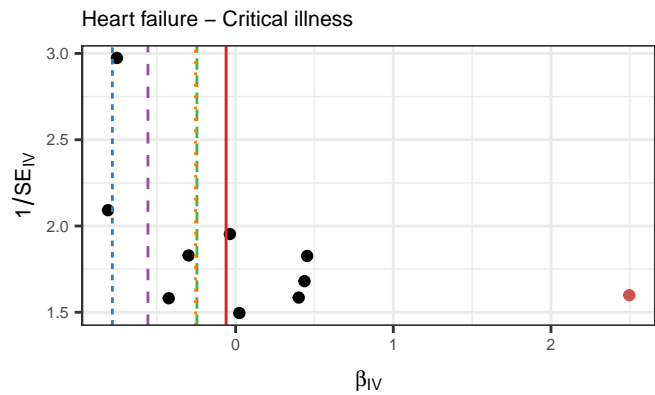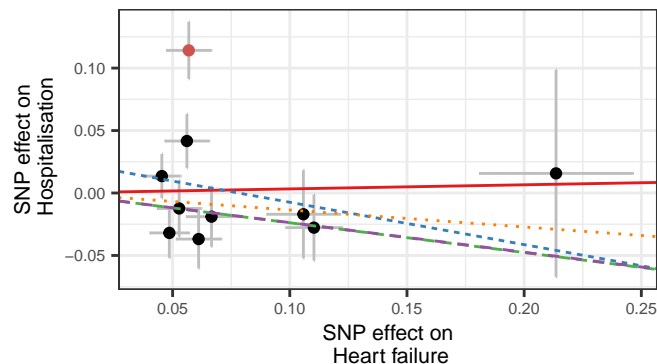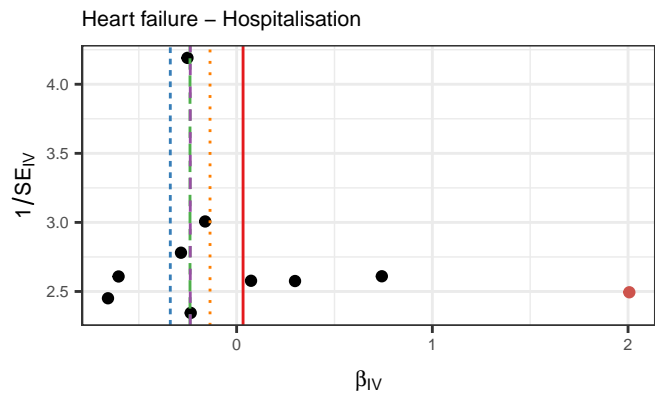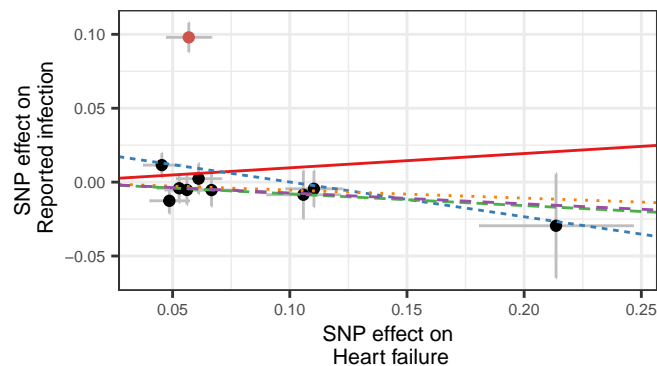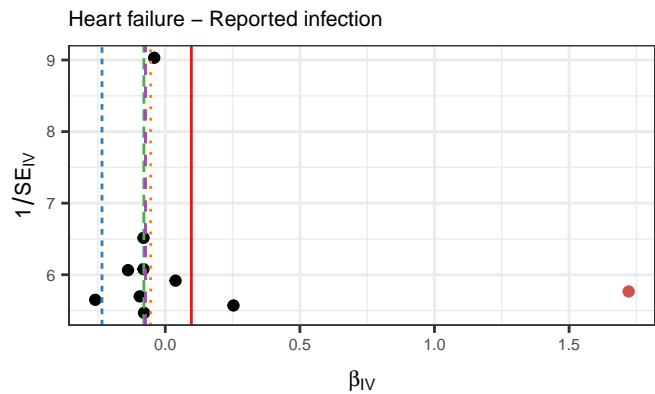

method — IWW - - - Egger - · - · WME - - - WMBE · · · MRPRESSO

Bipolar disorder – Critical illness

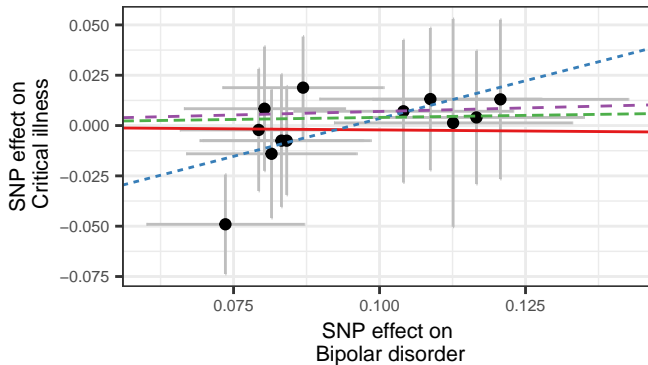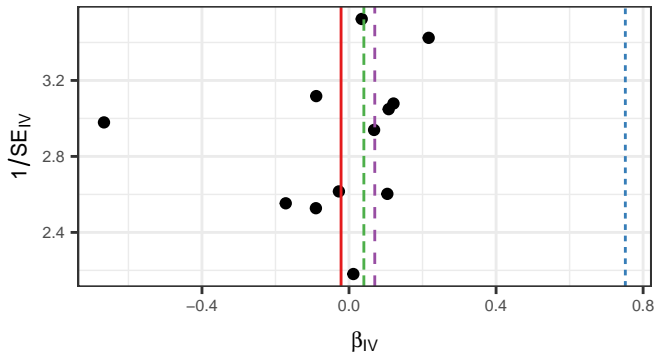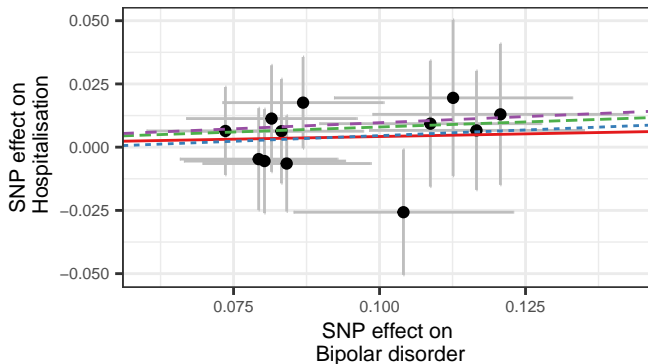

Bipolar disorder – Hospitalisation

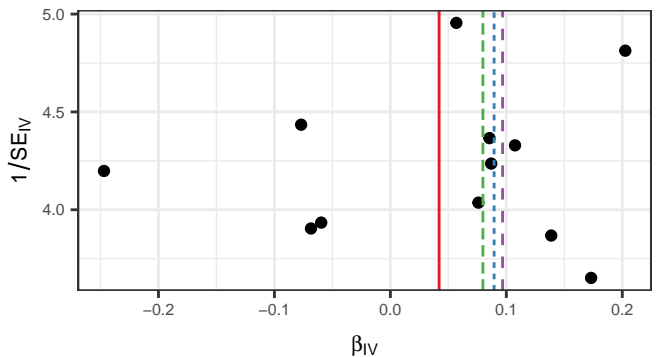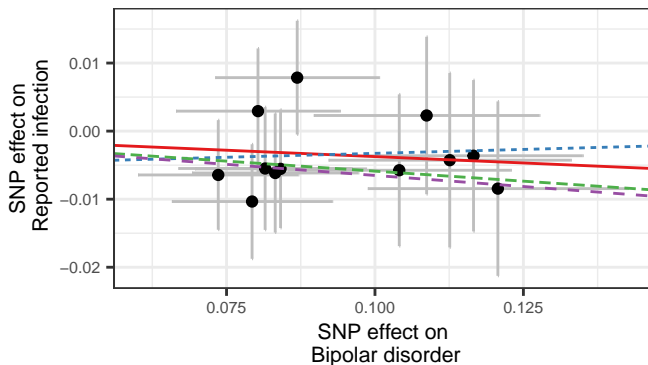

Bipolar disorder – Reported infection

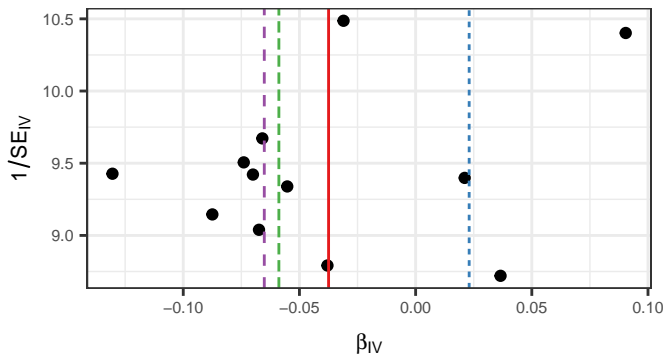

method — IVW - - - Egger - - - WME - - - WMBE - - - MRPRESSO

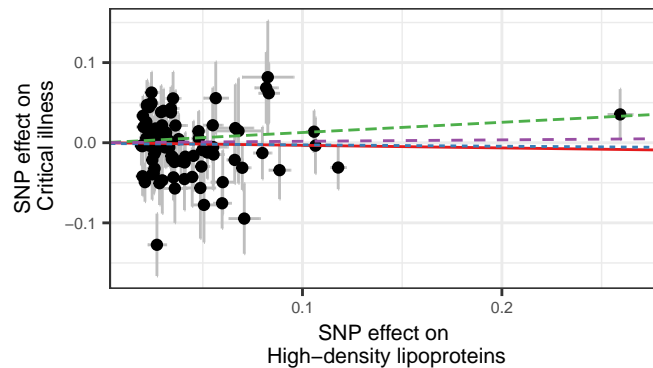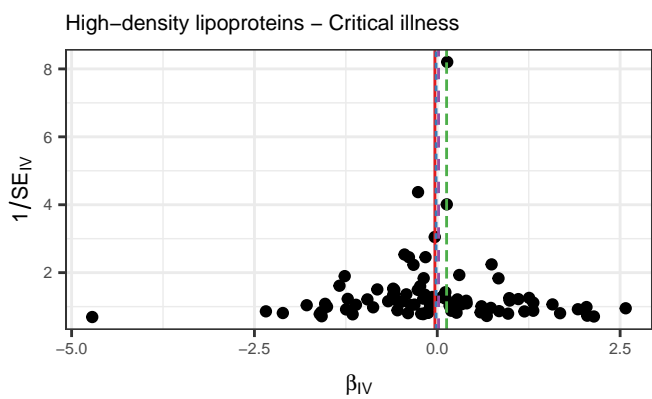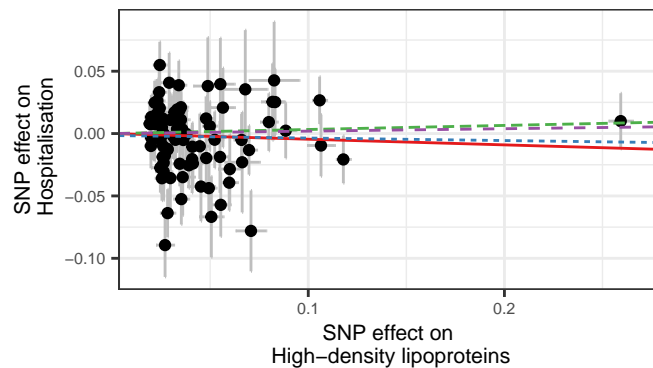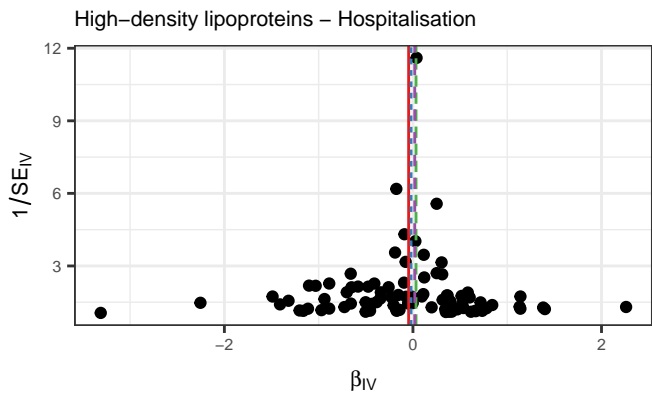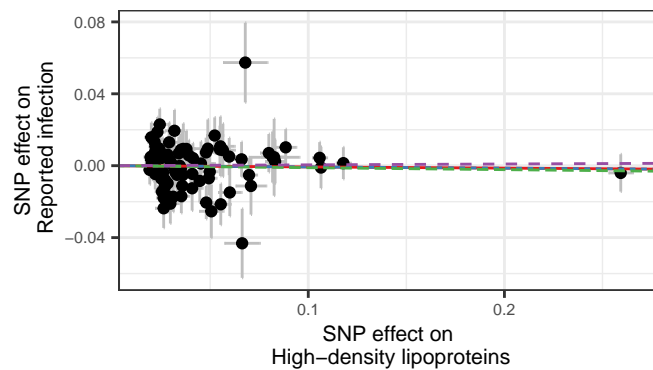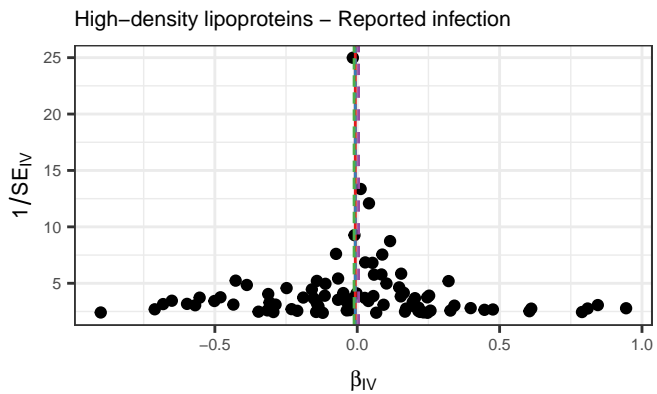

method / IVW - - - Egger - - - WME - - - WMBE - - - MRPRESSO

Low-density lipoproteins – Critical illness

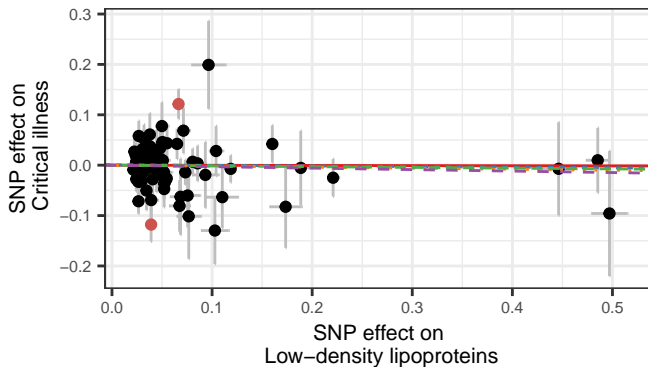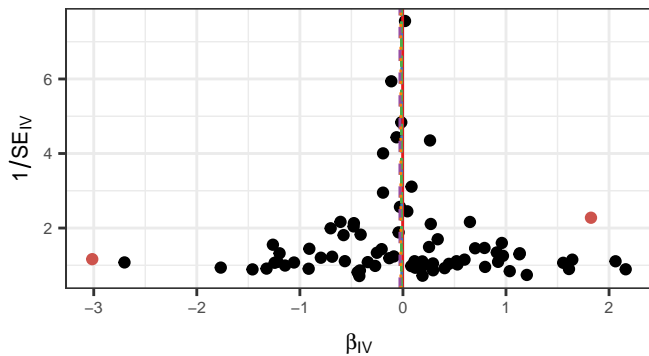

Low-density lipoproteins – Hospitalisation

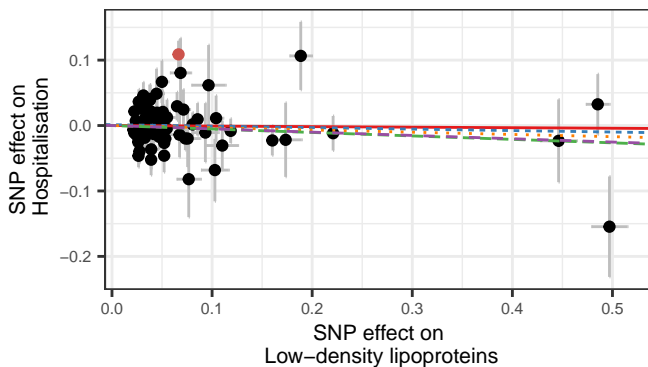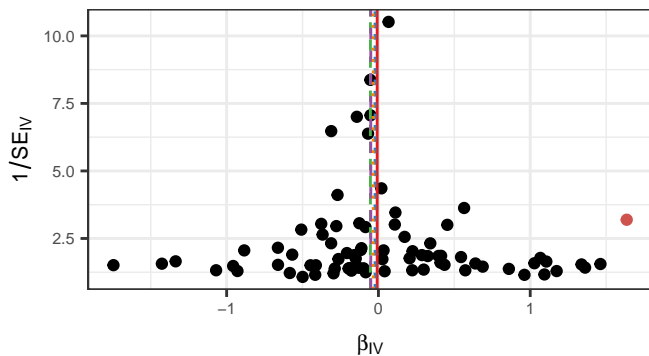

Low-density lipoproteins – Reported infection

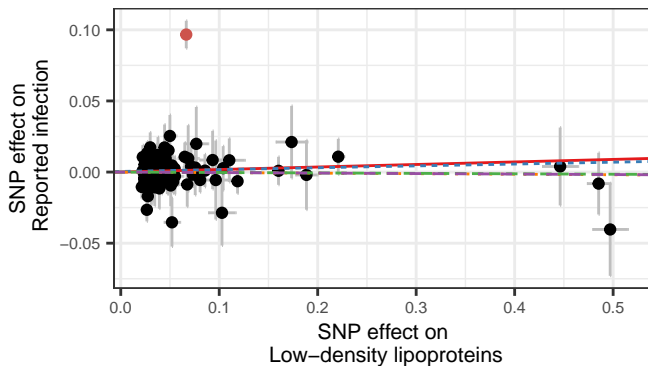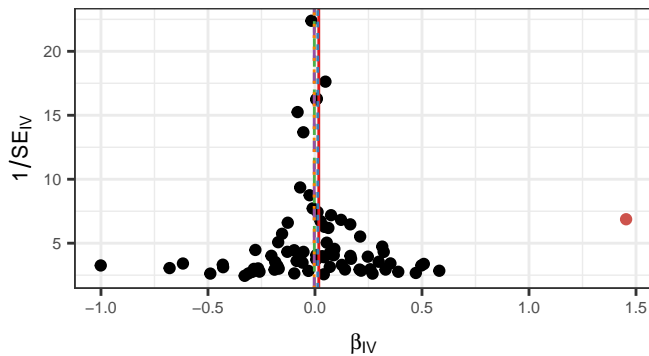

method — IVW - - - Egger - - - WME - - - WMBE · · · MRPRESSO



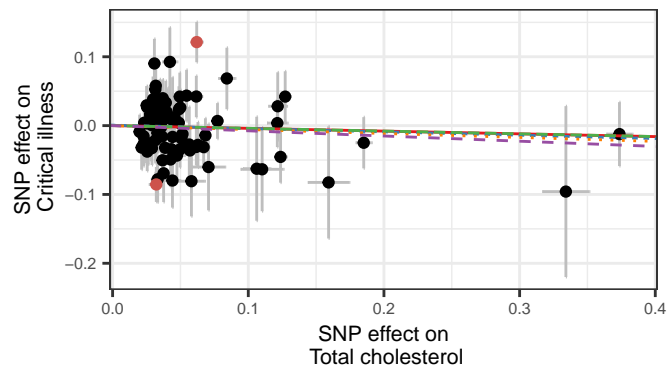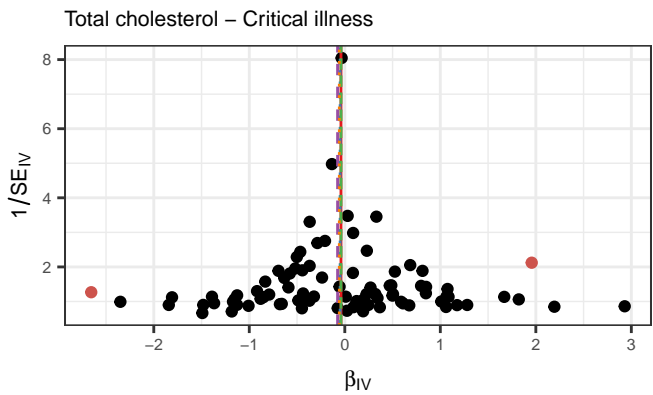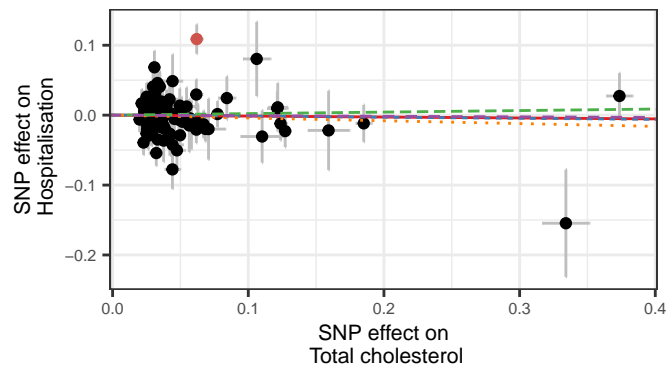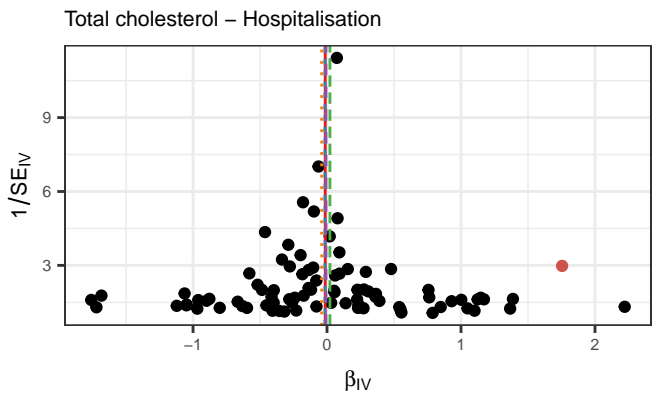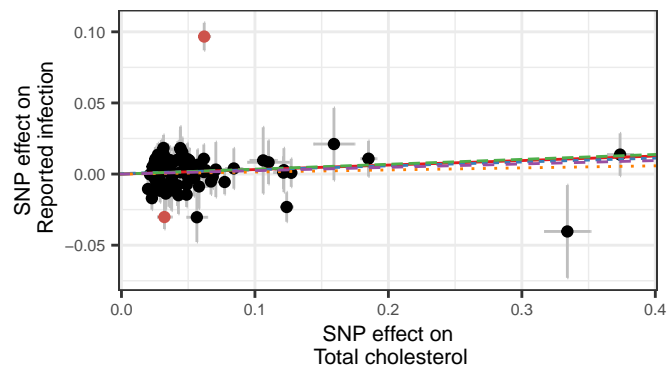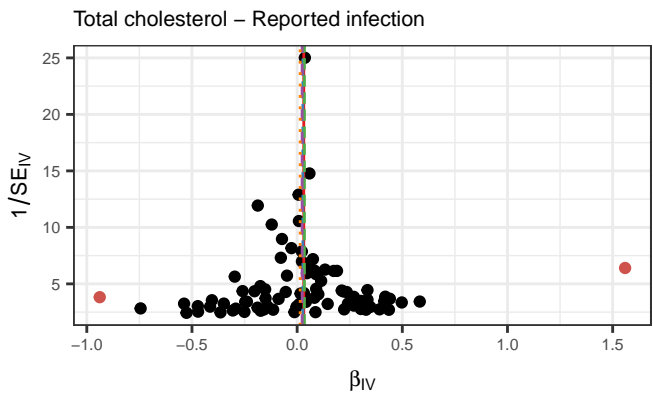

method / IWW - - - Egger - - - WME - - - WMBE - - - MRPRESSO

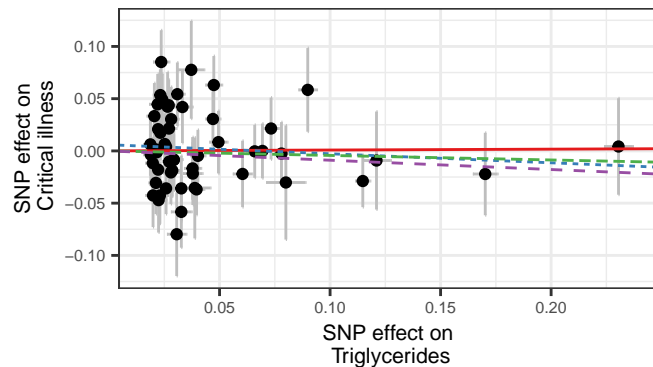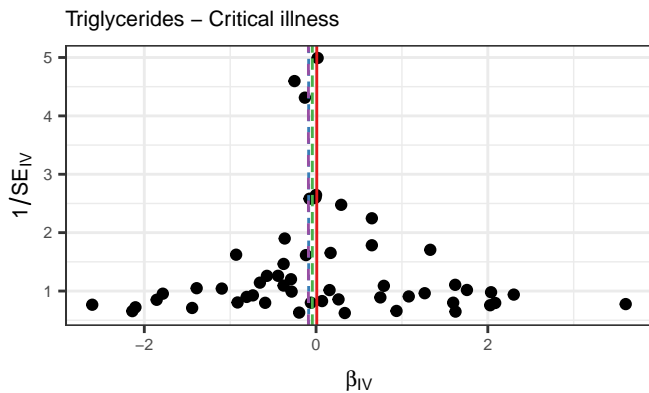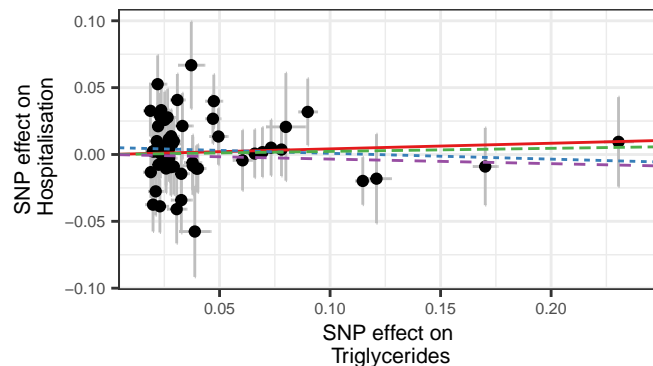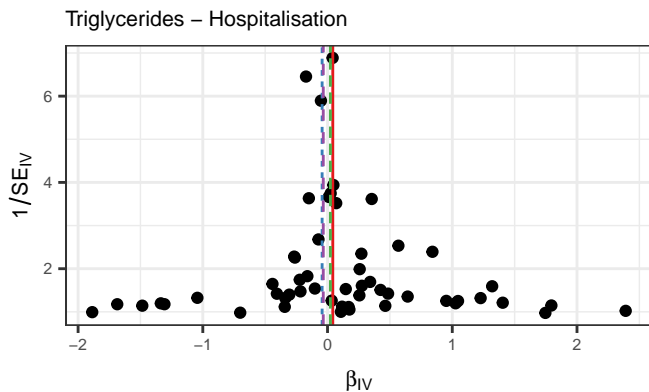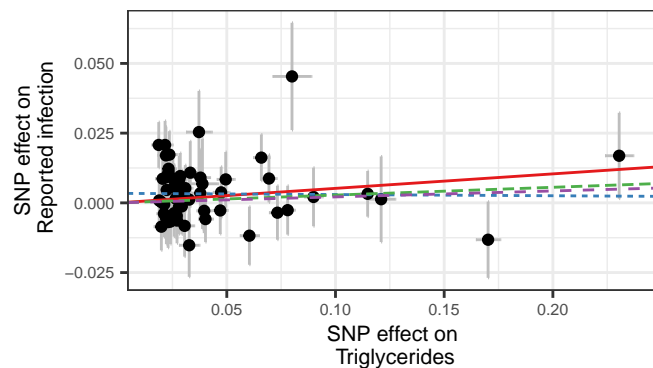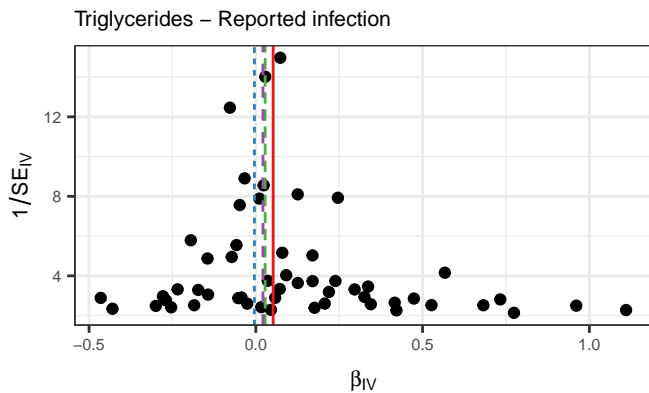

method — IVW - - - Egger - - - WME - - - WMBE - - - MRPRESSO

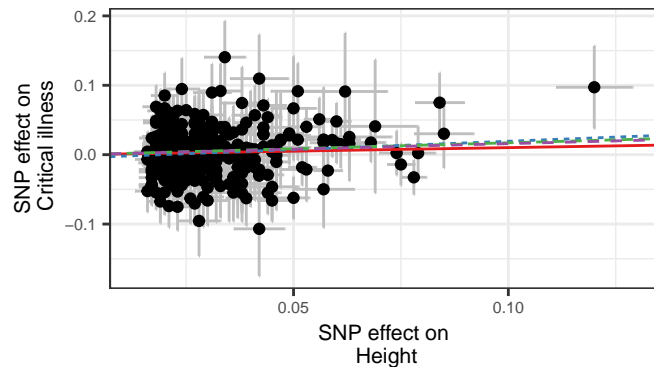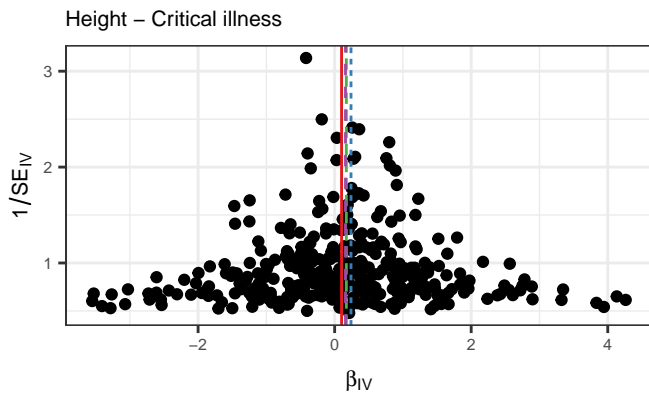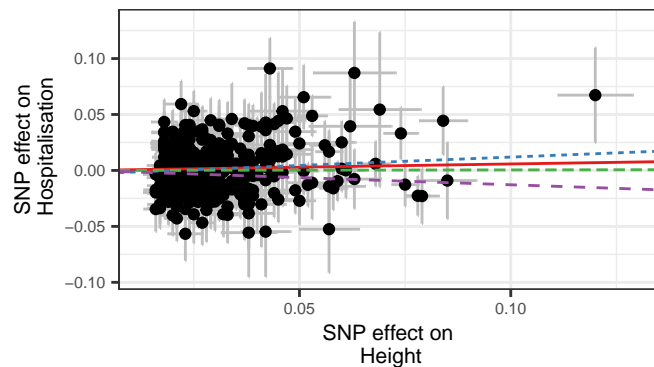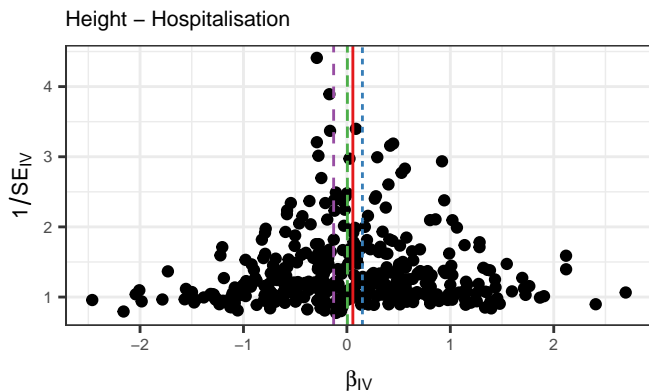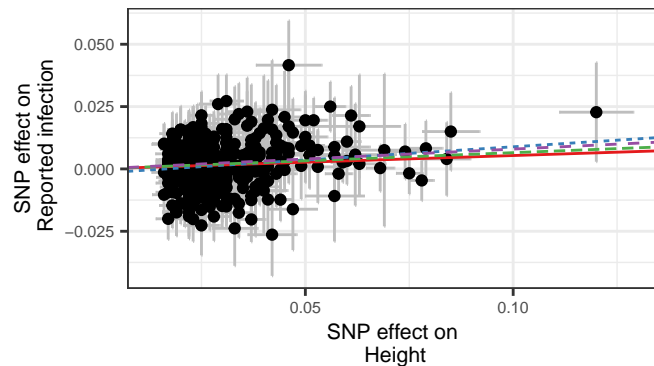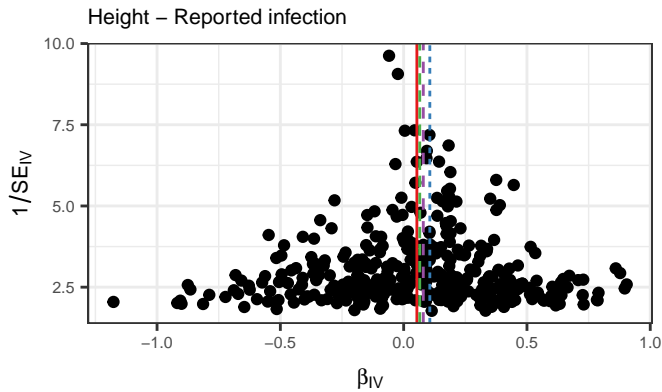

method — IVW — Egger — WME — WMBE — MRPRESSO

Chronic kidney disease – Critical illness

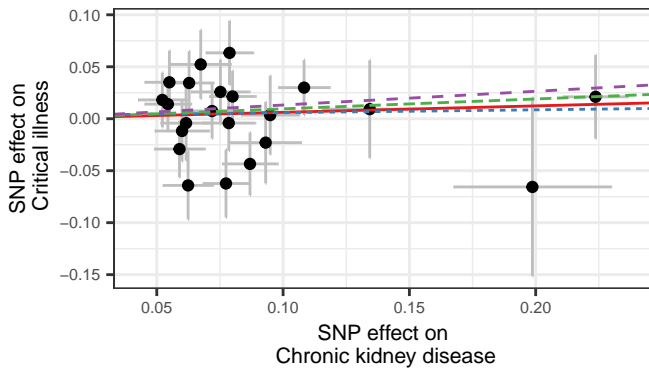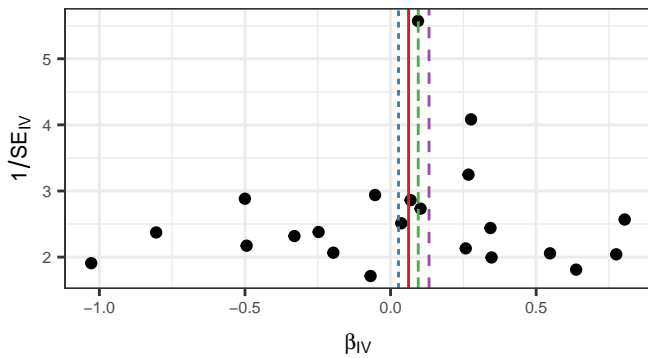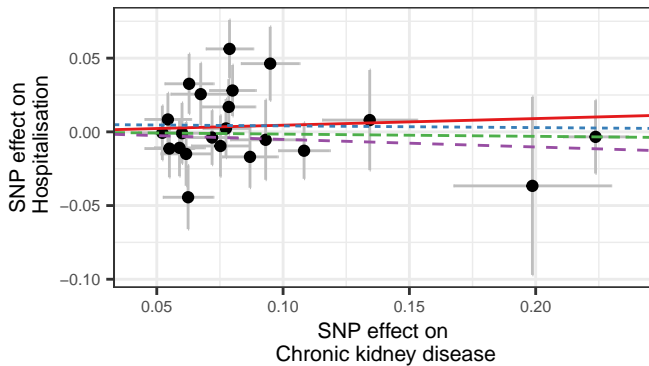

Chronic kidney disease – Hospitalisation

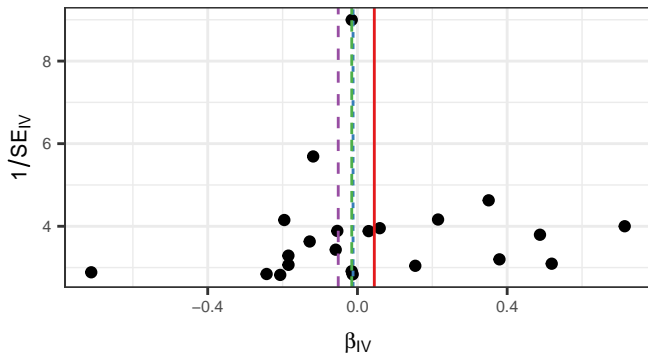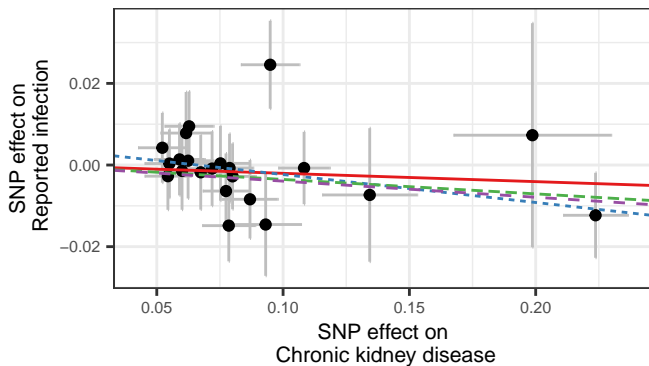

Chronic kidney disease – Reported infection

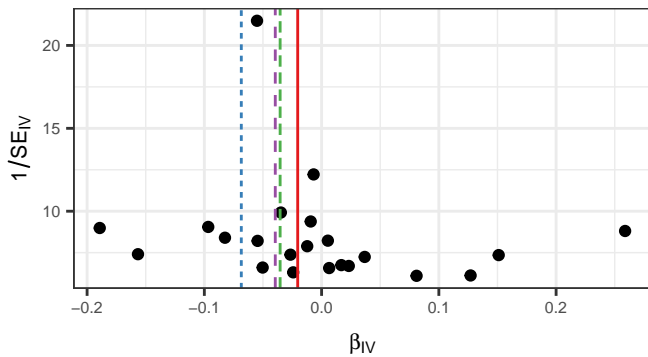

method / IVW - - - Egger - - - WME - - - WMBE - - - MRPRESSO

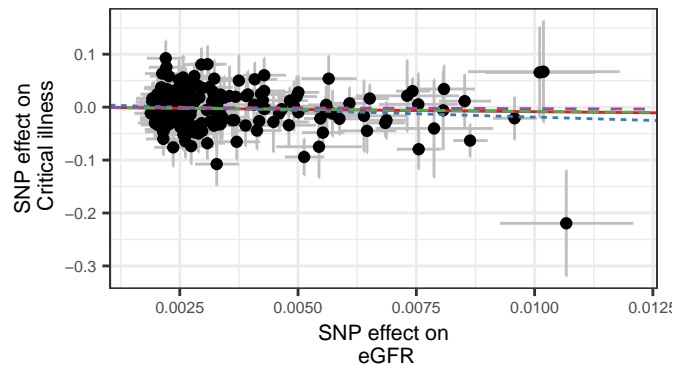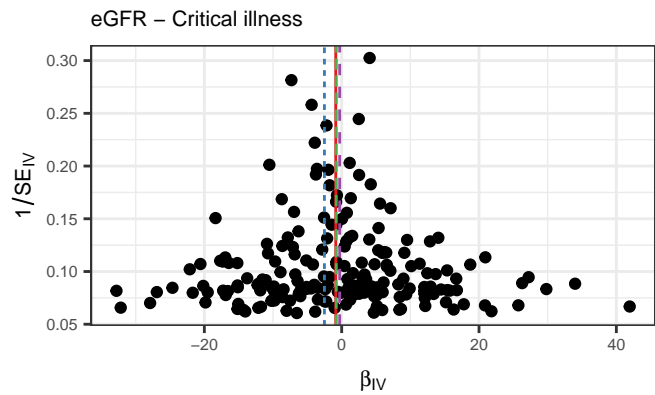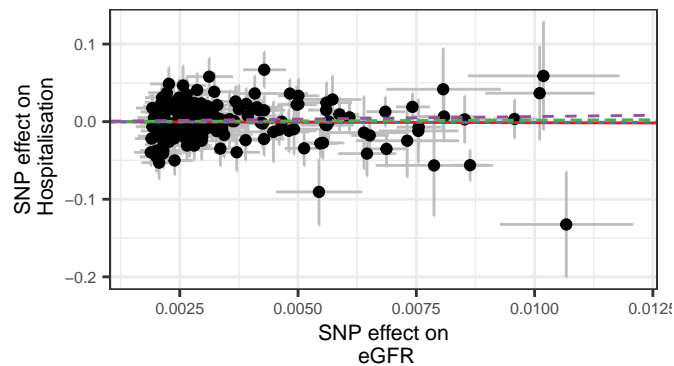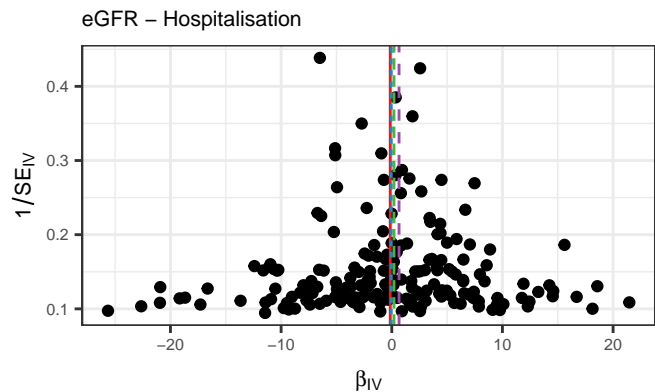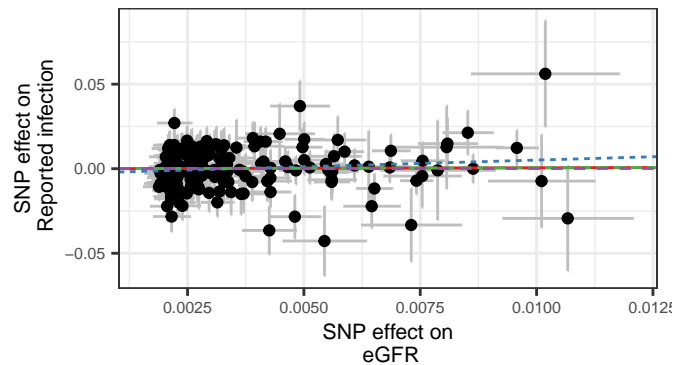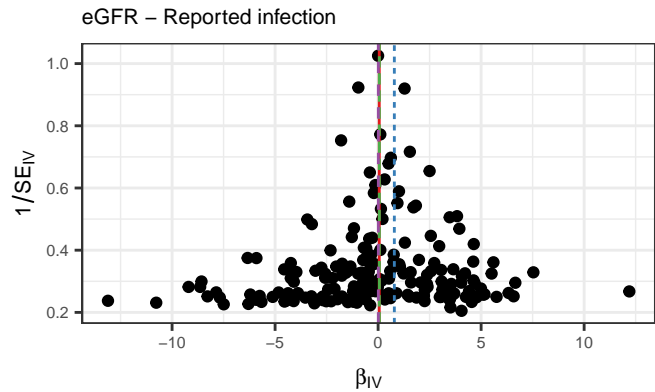

method / IWV - - - Egger - - - WME - - - WMBE - - - MRPRESSO

BMI – Critical illness

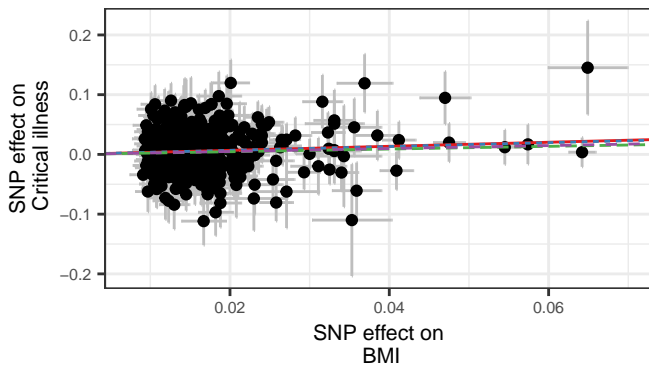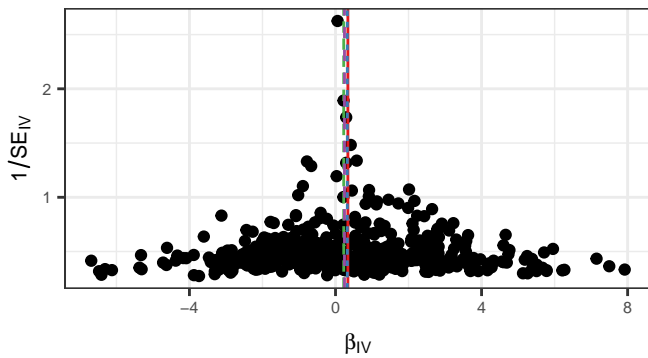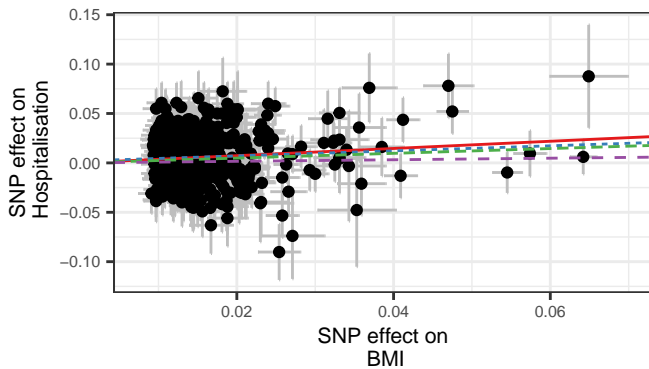

BMI – Hospitalisation

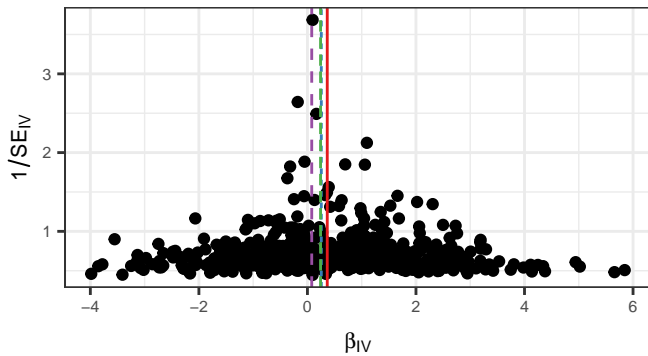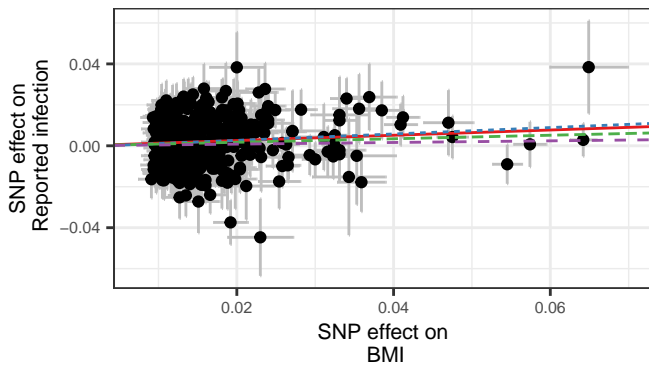

BMI – Reported infection

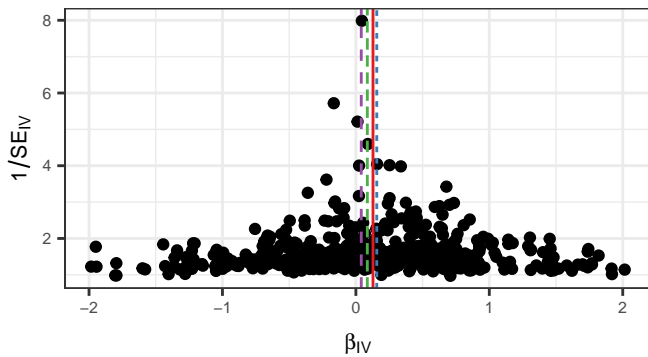

method — IVW - - - Egger - - - WME - - - WMBE - - - MRPRESSO
